# Supplementary material for: A comparative study on the performance of subphthalocyanines and corannulene derivatives as receptors for fullerenes
Source: Royal Society of Chemistry journal article supplement (doi:10.1039/c4nj00865k), 2014-01-01
Supplement: c4nj00865k1.pdf [file c4nj00865k1.pdf]

## Supplementary Information for A comparative study on the performance of suphthalocyanines and corannulene derivatives as receptors for fullerenes

**Pablo A. Denis\***

*Computational Nanotechnology, DETEMA, Facultad de Química, UDELAR, CC 1157,  
11800 Montevideo, Uruguay,*

\* e-mail: pablod@fq.edu.uy

### Cartesian coordinates of the supramolecular complexes determined at the M06-2X/6-31G level:

#### **C60@subphthalocyanine**

C, 0, 3.2268847447, -1.7477943944, 2.5623894823  
C, 0, 3.1561148496, -0.4829146994, 3.2184698644  
C, 0, 2.5542127062, -0.361792961, 4.4710271748  
C, 0, 2.0403303511, -1.5101121907, 5.0647957814  
C, 0, 2.1011796191, -2.7579357775, 4.4131117097  
C, 0, 2.6856562923, -2.8882518671, 3.1571012258  
C, 0, 3.7481267476, -1.5128475681, 1.2243595429  
C, 0, 3.625190171, 0.5213461314, 2.2752165819  
H, 0, 2.4787448448, 0.6068231542, 4.9506631258  
H, 0, 1.5702377861, -1.4444990095, 6.0389544249  
H, 0, 1.6752547439, -3.6285424505, 4.8977519288  
H, 0, 2.7098705215, -3.8401029735, 2.6400347428  
C, 0, 3.0630856434, -0.8004364103, -3.1482160223  
C, 0, 3.1634320378, -1.9948426393, -2.3748516489  
C, 0, 2.6247198059, -3.1941030823, -2.8426606614  
C, 0, 2.0061638937, -3.1923507639, -4.0886453483  
C, 0, 1.9103329164, -2.013350746, -4.853831885  
C, 0, 2.4286972437, -0.8078132556, -4.390167672  
C, 0, 3.5589298925, 0.292302978, -2.3240349947  
C, 0, 3.7230478885, -1.6279000342, -1.0825407102  
H, 0, 2.6756063426, -4.0914263818, -2.2375306116  
H, 0, 1.5819288455, -4.1106810201, -4.4771413916  
H, 0, 1.4135681764, -2.0477779403, -5.8163740229  
H, 0, 2.3323369297, 0.1082177904, -4.9608052439  
C, 0, 2.7391198705, 3.6497193811, 0.544422667  
C, 0, 2.7077973815, 3.5729891745, -0.8818017058  
C, 0, 2.020270577, 4.5274690138, -1.6305221444  
C, 0, 1.3875865916, 5.5643949597, -0.9498411472  
C, 0, 1.4185761063, 5.6394948829, 0.4554403188  
C, 0, 2.0829836846, 4.6809855618, 1.2154344241  
C, 0, 3.4139907932, 2.4503382451, 1.0260348679  
C, 0, 3.3732937078, 2.3337197713, -1.263852695  
H, 0, 1.979231038, 4.4510737325, -2.7105674393  
H, 0, 0.8528836918, 6.3236060574, -1.5082441367  
H, 0, 0.9072680609, 6.4552134474, 0.9528488244  
H, 0, 2.0885279465, 4.7213244549, 2.2981232556

N,0,3.8446596438,1.7986216707,-0.0970507258  
N,0,4.076905827,-0.1802283158,1.1817792268  
N,0,4.0524306222,-0.2979071746,-1.1838513267  
N,0,3.3670528403,1.8404751126,2.2244552289  
N,0,3.6336840698,-2.2543158765,0.1056515599  
N,0,3.2941233766,1.6087644664,-2.394778163  
B,0,4.6212687932,0.5143558323,-0.0442002002  
C,0,8.187892003,-2.1686148648,0.0608365056  
C,0,9.4430918401,-1.5650553519,0.0229941759  
C,0,9.5302371553,-0.1715327061,-0.0459730119  
C,0,8.3767465853,0.6054974149,-0.0764329811  
C,0,7.1201032025,-0.006521966,-0.0382621535  
C,0,7.0232518007,-1.3979764172,0.0306908806  
H,0,8.1050524098,-3.2483833637,0.1142768039  
H,0,10.3418193662,-2.1695787369,0.0456937714  
H,0,10.5004688374,0.3112769133,-0.0771758901  
H,0,8.4171687257,1.6861912068,-0.1300041786  
H,0,6.0596709738,-1.8889479184,0.0616402999  
O,0,6.0278653772,0.8365691309,-0.0736454031  
C,0,0.3188423944,-1.3837462521,-1.3153751809  
C,0,-0.2564550698,-2.5802046771,-0.7176643948  
C,0,-1.3871727689,-3.1596132734,-1.2800094935  
C,0,-1.9941951402,-2.5707928831,-2.4669520906  
C,0,-1.4419264259,-1.4298520909,-3.0356450225  
C,0,-0.2579802718,-0.8224838871,-2.4457766562  
C,0,0.7957738779,-0.5244586726,-0.2388035866  
C,0,0.5048797544,-1.1887698515,1.0240366126  
C,0,-0.1401059437,-2.4605695816,0.7300381984  
C,0,-1.1610340781,-2.9245516891,1.5502935587  
C,0,-2.4578594794,-3.6446671937,-0.419718244  
C,0,-3.4405781116,-2.6924917653,-2.339840634  
C,0,-4.2668485199,-1.6703239776,-2.789899734  
C,0,-3.68713198,-0.4756660113,-3.3882289475  
C,0,-2.3082786622,-0.3578948069,-3.5076794565  
C,0,-1.6561780235,0.9111801738,-3.2125557898  
C,0,-0.3868218846,0.6248747599,-2.5569928495  
C,0,0.0652437354,1.4445271069,-1.5313616924  
C,0,0.671818088,0.8555144762,-0.3435471048  
C,0,0.1050968003,-0.4427101369,2.1238481326  
C,0,-0.0228984944,1.0032565531,2.0169741033  
C,0,0.2494093395,1.636720574,0.8114745215  
C,0,-0.6146619381,2.709713184,0.3383252595  
C,0,-0.7290096681,2.5905764682,-1.1094962857  
C,0,-1.9395799234,2.8642708995,-1.7348248131  
C,0,-2.4138612367,2.0044667548,-2.8119129186  
C,0,-3.860073052,1.8799835122,-2.685461122  
C,0,-4.4819176634,0.67013459,-2.9675079364  
C,0,-3.7265684803,-3.3567874766,-1.0750746388  
C,0,-6.2388787309,0.2646883724,0.2578652169  
C,0,-6.1117859302,-1.1145936344,0.3619675054  
C,0,-5.504988468,-1.7031977251,1.5480638616  
C,0,-5.0536435423,-0.8847808559,2.5754542901  
C,0,-5.1869332782,0.5622007101,2.4663137775  
C,0,-5.1850629677,2.3184300013,0.7364386366  
C,0,-5.3004885775,2.1982596673,-0.7109477149  
C,0,-5.9522207776,0.9292723672,-1.0061365327

C, 0, -5.5529589982, 0.1834015647, -2.1078208416  
C, 0, -5.4197606484, -1.2634441894, -1.9982776756  
C, 0, -5.693226967, -1.897286451, -0.7928892488  
C, 0, -4.7104629593, -2.8489621362, 1.1268807265  
C, 0, -3.5006389716, -3.1229225587, 1.7522645615  
C, 0, -3.0269715794, -2.2645449185, 2.830615385  
C, 0, -3.7852711112, -1.1715919609, 3.231947872  
C, 0, -3.1343386459, 0.0974827773, 3.5280345137  
C, 0, -4.0006108559, 1.1689496086, 3.0549134418  
C, 0, -3.4469190033, 2.3082456361, 2.4842647273  
C, 0, -4.0533430619, 2.8964600626, 1.2974110116  
C, 0, -4.2788281798, 2.661696603, -1.5300055114  
C, 0, -3.0924576134, 3.2689531567, -0.9421671679  
C, 0, -2.9824440323, 3.3837676921, 0.4381613687  
C, 0, -1.7140141204, 3.097567527, 1.0938773192  
C, 0, -2.0006590249, 2.4321633179, 2.3585977686  
C, 0, -1.1752548662, 1.4100690373, 2.809278507  
C, 0, -1.7554041284, 0.2151498134, 3.4080231518  
C, 0, -0.9606248431, -0.931160789, 2.9873607841  
C, 0, -1.5804969341, -2.1422863125, 2.706217632  
C, 0, -4.8265393012, -2.9691743556, -0.3203311957  
C, 0, -2.3474768244, -3.5297373463, 0.9608213899  
C, 0, -5.765085148, 1.1235159487, 1.3348801172

### **C60@2subphthalocyanine**

C, 0, 5.4034296012, 3.7536385692, -1.1654223773  
C, 0, 5.4053272005, 3.1900808568, -2.4764341565  
C, 0, 4.6903780562, 3.7890938289, -3.5131858878  
C, 0, 3.98445885, 4.9542995985, -3.2337608789  
C, 0, 3.9675194274, 5.5026100064, -1.9359543735  
C, 0, 4.6670747073, 4.9066039893, -0.8909908984  
C, 0, 6.0954556003, 2.8179274865, -0.2907527804  
C, 0, 6.0785379825, 1.902725432, -2.3935708984  
H, 0, 4.6774936452, 3.3402272355, -4.4991956651  
H, 0, 3.4227335537, 5.4425437968, -4.0213337  
H, 0, 3.3887375131, 6.399389405, -1.7486353058  
H, 0, 4.6335070676, 5.3092369235, 0.1143329588  
C, 0, 5.9976743792, -0.5631220131, 2.6531010294  
C, 0, 5.8907800314, 0.8507283994, 2.813531509  
C, 0, 5.3109162766, 1.3958520341, 3.9593281645  
C, 0, 4.8584305288, 0.5223000184, 4.9433178073  
C, 0, 4.9623548275, -0.8731446241, 4.7838845528  
C, 0, 5.5227178307, -1.4290188996, 3.6374515375  
C, 0, 6.5031873688, -0.8106603572, 1.3106531228  
C, 0, 6.3249580046, 1.4610420039, 1.5654642536  
H, 0, 5.2061191417, 2.4692669517, 4.0629431476  
H, 0, 4.4073136784, 0.9187457424, 5.8453538513  
H, 0, 4.5885144363, -1.5232882381, 5.5660817844  
H, 0, 5.5802587417, -2.5017378737, 3.4968367817  
C, 0, 5.6928524573, -1.7067917248, -3.0144680798  
C, 0, 5.8145747916, -2.5444192671, -1.8632578992  
C, 0, 5.290614032, -3.8364773055, -1.864807638  
C, 0, 4.6708886969, -4.2913344533, -3.0257256903  
C, 0, 4.553573247, -3.4671764174, -4.160391052  
C, 0, 5.0513208325, -2.1667573491, -4.1635049807

C,0,6.1929421804,-0.3890529161,-2.643008752  
C,0,6.3977784664,-1.7375247906,-0.7991363176  
H,0,5.3593568373,-4.4569195112,-0.9790959121  
H,0,4.260644271,-5.293897738,-3.054760264  
H,0,4.054723964,-3.8508292202,-5.042573758  
H,0,4.9366420671,-1.518691713,-5.0241817103  
N,0,6.6783638131,-0.5276893213,-1.371492449  
N,0,6.5693507385,1.8233241862,-1.1112832625  
N,0,6.797547016,0.428447253,0.7914456054  
N,0,5.9603134543,0.8206818401,-3.18418123  
N,0,6.0349129363,2.6689024211,1.0469216043  
N,0,6.3801969497,-1.9031159658,0.5364336566  
B,0,7.3133537768,0.6049234331,-0.6175152036  
C,0,10.5441739023,3.310986032,0.8510770747  
C,0,11.8403543661,3.0571647531,0.4070915032  
C,0,12.0723504008,1.9720244292,-0.4431558432  
C,0,11.0209676944,1.1536346772,-0.8429767055  
C,0,9.7224613361,1.4138385979,-0.3938131226  
C,0,9.4811001132,2.4952501843,0.4563424082  
H,0,10.349688348,4.1492358663,1.5105465313  
H,0,12.659839769,3.693756545,0.718345584  
H,0,13.0759391566,1.7632362836,-0.7960627072  
H,0,11.1738611596,0.3067034737,-1.5000133797  
H,0,8.4837765451,2.7098121861,0.8169325037  
O,0,8.7393691614,0.5515210414,-0.8358809739  
C,0,2.979161306,0.5284411547,1.814694435  
C,0,2.289307185,1.792506533,2.0287983676  
C,0,1.1363941196,1.8286383054,2.8031269169  
C,0,0.6226172638,0.6029025826,3.4012984509  
C,0,1.286186021,-0.6012786348,3.1979523907  
C,0,2.494928411,-0.6389686683,2.3866762863  
C,0,3.482498788,0.5156499522,0.4475686917  
C,0,3.0969266964,1.7687596196,-0.1833077168  
C,0,2.3621114751,2.5607666857,0.7934435966  
C,0,1.2789529884,3.3297331621,0.3871761143  
C,0,-0.0008130196,2.6335307714,2.3767914027  
C,0,-0.8316253572,0.6508981407,3.3453925805  
C,0,-1.5537460298,-0.507623937,3.0878422921  
C,0,-0.8588552798,-1.7707074071,2.8753180051  
C,0,0.5282714538,-1.8164603427,2.928752768  
C,0,1.2698252481,-2.6050450905,1.952511144  
C,0,2.4870653629,-1.8775688134,1.6171268426  
C,0,2.9667659226,-1.8914766393,0.313694005  
C,0,3.4750070257,-0.6637188817,-0.2854223248  
C,0,2.7208160187,1.785906301,-1.519219618  
C,0,2.7122111146,0.5515797212,-2.2896936905  
C,0,3.0766298104,-0.6450207824,-1.6859441616  
C,0,2.3229071241,-1.860784718,-1.9550662285  
C,0,2.2521096338,-2.6297682005,-0.7191095004  
C,0,1.0913294424,-3.3232974985,-0.3996980279  
C,0,0.5882031102,-3.3101816858,0.9678284145  
C,0,-0.8672586492,-3.2609397173,0.9112752955  
C,0,-1.5734966161,-2.5102379127,1.8423921341  
C,0,-1.2177732504,1.9064365194,2.7128546899  
C,0,-3.4753503133,-0.4344750899,-0.5533123909  
C,0,-3.4623487628,0.7454139027,0.1816535845

C, 0, -2.9448650946, 1.9706226846, -0.4155708505  
C, 0, -2.465488293, 1.9578788052, -1.7179138755  
C, 0, -2.4815710787, 0.7225733664, -2.4896338511  
C, 0, -2.2782124927, -1.7094881885, -2.1338926232  
C, 0, -2.3487714324, -2.4768773745, -0.8975511159  
C, 0, -3.0866797694, -1.6882235621, 0.0797784665  
C, 0, -2.7099270408, -1.7048114982, 1.416171659  
C, 0, -2.6928816291, -0.4674576769, 2.1828776347  
C, 0, -3.061465441, 0.7279343813, 1.5825608532  
C, 0, -2.23521406, 2.7121489836, 0.6167939872  
C, 0, -1.0756744206, 3.4076105452, 0.2968173774  
C, 0, -0.5720138034, 3.3960192466, -1.0716410687  
C, 0, -1.252771687, 2.6891869351, -2.0556794402  
C, 0, -0.5121910957, 1.900766073, -3.0321942851  
C, 0, -1.2708181309, 0.6853195255, -3.3000266557  
C, 0, -0.6074518725, -0.5184674561, -3.5020729679  
C, 0, -1.1225884845, -1.7442182965, -2.9051800422  
C, 0, -1.2635873153, -3.2436631156, -0.4910283916  
C, 0, -0.0538277484, -3.2817000328, -1.3003299054  
C, 0, 0.014829806, -2.5487275369, -2.4791220648  
C, 0, 1.2326683875, -1.821908047, -2.8145007772  
C, 0, 0.8472254834, -0.5664862282, -3.446905945  
C, 0, 1.5702865293, 0.592138281, -3.1921175998  
C, 0, 0.8752278991, 1.8560129347, -2.9800521145  
C, 0, 1.5890349723, 2.5961278344, -1.9471513846  
C, 0, 0.8834023909, 3.3482898364, -1.0158637553  
C, 0, -2.3080338565, 1.9440382931, 1.8526121351  
C, 0, 0.0686851325, 3.3663300778, 1.1971767069  
C, 0, -2.9722203787, -0.4456885225, -1.9214874129  
C, 0, -5.8689125515, -2.906140904, -1.2338992229  
C, 0, -5.8384764056, -2.1559330734, -2.447127321  
C, 0, -5.2463581489, -2.6824439984, -3.5954023348  
C, 0, -4.7113110787, -3.9647829722, -3.5274989693  
C, 0, -4.7418094738, -4.7059142383, -2.3299391014  
C, 0, -5.307697284, -4.1819264499, -1.1719224096  
C, 0, -6.4217935165, -2.0384004845, -0.2045221231  
C, 0, -6.3731510028, -0.8340330508, -2.153768583  
H, 0, -5.2015821106, -2.0963845893, -4.5055204689  
H, 0, -4.2515075012, -4.399835066, -4.4069980212  
H, 0, -4.3047381297, -5.6972995948, -2.31063573  
H, 0, -5.308777322, -4.7364750689, -0.2411621321  
C, 0, -5.7926875494, 0.8508097315, 3.1602320583  
C, 0, -5.8416095079, -0.5741350178, 3.1177924141  
C, 0, -5.2513878388, -1.3376183024, 4.1252065022  
C, 0, -4.6239702203, -0.6686765462, 5.1711383142  
C, 0, -4.5643686967, 0.7388531006, 5.2066232301  
C, 0, -5.1398286349, 1.5101445215, 4.202199227  
C, 0, -6.3370585465, 1.3422715722, 1.9030933024  
C, 0, -6.4059366825, -0.9481402696, 1.8303380019  
H, 0, -5.2678823787, -2.419826013, 4.0736783248  
H, 0, -4.1567339729, -1.2366665513, 5.9669951797  
H, 0, -4.0516569037, 1.2247587516, 6.0283912451  
H, 0, -5.0722387897, 2.5914798757, 4.2083443556  
C, 0, -5.647646078, 2.7732835956, -2.2946581017  
C, 0, -5.6340828285, 3.445876341, -1.0358264608  
C, 0, -4.9639573444, 4.6596361631, -0.8847916588

C, 0, -4.3298969589, 5.2016329795, -1.9988875135  
C, 0, -4.3503630518, 4.5420167608, -3.2429407972  
C, 0, -4.9994748351, 3.3206125222, -3.4010306765  
C, 0, -6.2598588983, 1.46861181, -2.0796104371  
C, 0, -6.245506966, 2.5529414724, -0.0604649825  
H, 0, -4.9297532799, 5.1495076424, 0.0810031462  
H, 0, -3.8032491155, 6.1443544761, -1.9086448959  
H, 0, -3.8389803428, 4.9896587932, -4.087007613  
H, 0, -4.9900990304, 2.7931538543, -4.347349488  
N, 0, -6.6802281977, 1.4716466703, -0.7776585922  
N, 0, -6.8142667296, -0.8916796235, -0.852058924  
N, 0, -6.7917119919, 0.2291754367, 1.2366873218  
N, 0, -6.1696977058, 0.331388477, -2.7927462865  
N, 0, -6.2876618128, -2.0935505022, 1.1334879185  
N, 0, -6.1321842674, 2.5171036674, 1.2800065773  
B, 0, -7.394927489, 0.3132567667, -0.1439903788  
C, 0, -10.7940956006, -2.0014385482, 1.5853246323  
C, 0, -12.0306105423, -1.36041855, 1.632276812  
C, 0, -12.1690711796, -0.0961844253, 1.0518454263  
C, 0, -11.0830203643, 0.5196125895, 0.4381119793  
C, 0, -9.8444555754, -0.1275066745, 0.3974172906  
C, 0, -9.6984639781, -1.3935610615, 0.9685941374  
H, 0, -10.6743397727, -2.983979113, 2.0277057659  
H, 0, -12.8764720441, -1.8377240207, 2.112324861  
H, 0, -13.1263385657, 0.4120099703, 1.0802585915  
H, 0, -11.1636729042, 1.4991054189, -0.0161404414  
H, 0, -8.7501629514, -1.9136153167, 0.928237102  
O, 0, -8.8176623305, 0.5461037436, -0.2344817732

### **C70@subphthalocyanine-1**

C, 0, -6.6175181997, -2.1154384822, 1.1289126469  
C, 0, -5.7601089795, -1.0018118731, 0.8791223435  
C, 0, -6.2469608816, 0.140633843, 0.2442205809  
C, 0, -7.5923215805, 0.1704368597, -0.110386719  
C, 0, -8.4397881703, -0.9263888397, 0.1438760207  
C, 0, -7.9609649217, -2.0803592506, 0.7552105029  
C, 0, -5.7832046984, -3.1986555274, 1.624231569  
C, 0, -4.4076826301, -1.4068186823, 1.234773902  
H, 0, -5.5847909874, 0.9697660257, 0.0252897085  
H, 0, -7.9963184892, 1.0477368858, -0.6018539948  
H, 0, -9.479776073, -0.8713701282, -0.1556051057  
H, 0, -8.5994346796, -2.9394497704, 0.9235647909  
C, 0, -3.4083219384, -6.9007386303, 0.8000688473  
C, 0, -4.7926166265, -6.6943737453, 1.0799164462  
C, 0, -5.7448283825, -7.6444748371, 0.7118531993  
C, 0, -5.3034628633, -8.7998166427, 0.0750525391  
C, 0, -3.9384469825, -9.0010065613, -0.2087481008  
C, 0, -2.980959407, -8.0535521447, 0.1411973428  
C, 0, -2.7021499708, -5.6838953879, 1.1740944278  
C, 0, -4.9286477958, -5.3441759147, 1.6029407867  
H, 0, -6.7970040595, -7.4704086223, 0.9032996766  
H, 0, -6.0214038802, -9.5559756618, -0.2201882853  
H, 0, -3.6329029734, -9.9076477624, -0.7177618237  
H, 0, -1.9331051397, -8.1915973975, -0.0972824599  
C, 0, -0.9864553355, -1.7343848011, -0.074848299

C, 0, -0.4558582864, -3.0595144408, -0.0911412361  
C, 0, 0.6162319408, -3.3861292487, -0.9210157378  
C, 0, 1.1617230392, -2.3808955706, -1.7151904503  
C, 0, 0.6372160037, -1.0748357803, -1.7002145206  
C, 0, -0.4444515215, -0.7410243584, -0.8897640304  
C, 0, -2.1772011795, -1.7549690073, 0.7654499062  
C, 0, -1.3261480422, -3.8844586651, 0.737494673  
H, 0, 0.9985102128, -4.399626606, -0.9493292604  
H, 0, 1.9985028306, -2.6076208719, -2.3653177324  
H, 0, 1.0797157681, -0.3192472208, -2.3386903821  
H, 0, -0.8684516817, 0.2561738756, -0.894198011  
N, 0, -2.2404256293, -3.0217797597, 1.2781582459  
N, 0, -4.5268314743, -2.6645203468, 1.778853336  
N, 0, -3.648013447, -4.8686282571, 1.7506261645  
N, 0, -3.2300915696, -0.9200208332, 0.8048694733  
N, 0, -5.9982496713, -4.5274420301, 1.607403639  
N, 0, -1.5165074297, -5.2156342497, 0.7452064693  
B, 0, -3.3224736658, -3.4684740633, 2.2189012972  
C, 0, -5.2729290884, -4.5211992924, 6.0911094735  
C, 0, -4.5047154154, -4.3939337609, 7.2466283436  
C, 0, -3.199179037, -3.9033127456, 7.1500252128  
C, 0, -2.6701204528, -3.54804252, 5.9134113501  
C, 0, -3.4458249724, -3.6797949948, 4.7575135222  
C, 0, -4.752380996, -4.1654316141, 4.8448687797  
H, 0, -6.2877701275, -4.8980565808, 6.1515100432  
H, 0, -4.9158330138, -4.6706597621, 8.2100302258  
H, 0, -2.5913443409, -3.7984966225, 8.0415560221  
H, 0, -1.6616617557, -3.1672982916, 5.8114351401  
H, 0, -5.3697268573, -4.2650065829, 3.9620006759  
O, 0, -2.847840103, -3.303048147, 3.5714475765  
C, 0, -6.4566369067, -2.0830807808, -2.4814958057  
C, 0, -5.7268615231, -1.0744641033, -3.2254523243  
C, 0, -5.771421583, -3.0044087507, -1.6976006934  
C, 0, -4.3492341887, -1.0175468477, -3.1488034629  
C, 0, -3.566960488, -0.7618782951, -4.3514332809  
C, 0, -4.1893083028, -0.4718133137, -5.5914297574  
C, 0, -3.4339081404, -0.7692259826, -6.7533520484  
C, 0, -7.2239970051, -4.8131581873, -2.5169924146  
C, 0, -7.9291236355, -3.8481147153, -3.3408874051  
C, 0, -6.1659626464, -4.4049655094, -1.7126614906  
C, 0, -7.5550712122, -2.5188780601, -3.3229998284  
C, 0, -7.5108341741, -1.7625032902, -4.5674285412  
C, 0, -7.9361279046, -2.3307826018, -5.7940950634  
C, 0, -7.377479672, -1.7680127327, -6.9688378844  
C, 0, -5.6598460271, -0.5307099396, -5.6722365803  
C, 0, -6.3895386268, -0.876117519, -4.5072970099  
C, 0, -6.2568685136, -0.8817923175, -6.9091219329  
C, 0, -4.868109688, -6.385993078, -2.3864623933  
C, 0, -5.9739411001, -6.8020284089, -3.2271209582  
C, 0, -4.9569234921, -5.2118137314, -1.6477894248  
C, 0, -7.1213212446, -6.0359595874, -3.2918044642  
C, 0, -7.781395314, -5.8275022554, -4.5731430645  
C, 0, -7.3300594074, -6.4734225219, -5.7512953734  
C, 0, -7.647969904, -5.8330956571, -6.9747711374  
C, 0, -8.3357466679, -3.7492756699, -5.8131248398  
C, 0, -8.2766848811, -4.4858184084, -4.6033180848

C, 0, -8.1425724256, -4.4916293001, -7.0052179935  
C, 0, -2.6475167829, -4.6299424485, -2.2666298547  
C, 0, -2.5635095788, -5.8550961854, -3.0385549879  
C, 0, -3.8153932505, -4.3107571486, -1.5811275904  
C, 0, -3.6474441252, -6.7092361186, -3.0983807004  
C, 0, -4.0038856087, -7.3421578984, -4.3609267218  
C, 0, -3.2076325434, -7.1762603534, -5.5214577401  
C, 0, -3.8711913232, -7.347429516, -6.7623646924  
C, 0, -6.1060052322, -7.2925603804, -5.6816389135  
C, 0, -5.4314322415, -7.3990608089, -4.4397871513  
C, 0, -5.2982296958, -7.4036556971, -6.8408671245  
C, 0, -3.6282449182, -1.9708672197, -2.3268122018  
C, 0, -2.4140187496, -2.3141684421, -3.042141518  
C, 0, -4.3197956291, -2.9455814333, -1.6152249671  
C, 0, -1.9370500916, -3.6091824474, -3.0130160581  
C, 0, -1.3997071544, -4.2114536976, -4.2241221157  
C, 0, -1.2659863101, -3.4666014479, -5.4226066247  
C, 0, -1.2666460883, -4.2164507845, -6.6252341349  
C, 0, -2.0525037832, -6.2626893743, -5.4595563713  
C, 0, -1.7858342503, -5.5886963793, -4.2414411317  
C, 0, -1.6535972538, -5.5933562306, -6.6434028837  
C, 0, -1.7757124859, -2.0830231658, -5.4541847468  
C, 0, -2.3787987753, -1.5557718135, -4.2845490116  
C, 0, -2.2458855373, -1.5622325606, -6.6860012963  
C, 0, -2.2913671712, -4.6444665227, -8.7073782883  
C, 0, -1.6650849236, -3.6199310592, -7.8928404997  
C, 0, -2.1426131065, -2.3251102925, -7.9227982879  
C, 0, -3.3763625886, -4.3289120001, -9.5182518177  
C, 0, -4.5124040704, -6.3996999846, -8.82657343  
C, 0, -3.3777620661, -6.7201675916, -7.9804627247  
C, 0, -2.2959783587, -5.8644889681, -7.9223783902  
C, 0, -4.5172617315, -5.2306264307, -9.5796770042  
C, 0, -6.8651578129, -4.827078392, -8.961142378  
C, 0, -6.8502638646, -6.0465364308, -8.1745344183  
C, 0, -5.7038008821, -6.8125413762, -8.1090337712  
C, 0, -5.7257631499, -4.4224852233, -9.6487702246  
C, 0, -6.0987510913, -2.099545081, -8.9247095774  
C, 0, -7.2831608238, -2.5306012166, -8.2059101392  
C, 0, -7.6562014565, -3.8595624041, -8.2234856253  
C, 0, -5.3325506898, -3.0212982407, -9.6300974628  
C, 0, -3.2719510952, -1.9865138801, -8.7692562258  
C, 0, -4.0788800832, -1.0316973271, -8.032692394  
C, 0, -5.4559692045, -1.0865917185, -8.1086826095  
C, 0, -3.8802471961, -2.9634601454, -9.5499102562

## **C70@subphthalocyanine-2**

C, 0, -6.7369763122, -1.7992367992, 0.9566640459  
C, 0, -5.754324504, -0.7737395469, 0.8087436023  
C, 0, -6.1030754787, 0.4734654981, 0.2909337861  
C, 0, -7.4367669981, 0.6970555931, -0.0402761555  
C, 0, -8.407146396, -0.3109376966, 0.116646745  
C, 0, -8.0664159585, -1.5694748529, 0.6028940515  
C, 0, -6.0404123887, -3.0053630719, 1.3811915558  
C, 0, -4.4644560049, -1.3521423381, 1.1653155961



H, 0, -5.3495149896, 1.239560434, 0.1528578295  
H, 0, -7.7349475355, 1.6614920564, -0.4342232015  
H, 0, -9.4344308818, -0.1038443073, -0.1589195738  
H, 0, -8.802410332, -2.3593072727, 0.6945890895  
C, 0, -3.9803179457, -6.9216537652, 0.576000892  
C, 0, -5.3563311473, -6.5712387464, 0.7299774777  
C, 0, -6.3615308463, -7.410380727, 0.2476908044  
C, 0, -5.9839832534, -8.6023047577, -0.361797884  
C, 0, -4.6264617944, -8.9545257003, -0.5008380931  
C, 0, -3.6141713368, -8.1171658488, -0.0433966864  
C, 0, -3.1906461061, -5.785095786, 1.0254972966  
C, 0, -5.4017767542, -5.2258305709, 1.2834054759  
H, 0, -7.4029487357, -7.1242566487, 0.335081629  
H, 0, -6.74546544, -9.2721904566, -0.7436832338  
H, 0, -4.3702762554, -9.8895913569, -0.9851100128  
H, 0, -2.5681196817, -8.3669742487, -0.1750447494  
C, 0, -0.987705248, -1.987127818, 0.0871475709  
C, 0, -0.5842412257, -3.358383715, 0.065692736  
C, 0, 0.5348802835, -3.7589046197, -0.6622169922  
C, 0, 1.2549427724, -2.7834972395, -1.3478676065  
C, 0, 0.85692815, -1.4338344699, -1.3281886483  
C, 0, -0.2700196719, -1.0242721578, -0.6201321522  
C, 0, -2.2550777847, -1.9188429925, 0.8055762453  
C, 0, -1.6095705425, -4.1212134491, 0.767624307  
H, 0, 0.8218793238, -4.8033556734, -0.697770131  
H, 0, 2.1316924306, -3.0680273551, -1.9176593303  
H, 0, 1.4357476174, -0.7034863881, -1.8811161872  
H, 0, -0.5947970363, 0.0094830383, -0.62241729  
N, 0, -2.4831721824, -3.1887413641, 1.2550966595  
N, 0, -4.7452636622, -2.6157643561, 1.6263504651  
N, 0, -4.0967239901, -4.8925728897, 1.54756615  
N, 0, -3.2193723605, -0.9779809201, 0.8187345844  
N, 0, -6.383210951, -4.301486586, 1.2604459947  
N, 0, -1.931092149, -5.4268472656, 0.7110975637  
B, 0, -3.6655288974, -3.5581713982, 2.0988681998  
C, 0, -5.9486625795, -4.6757263848, 5.7635383382  
C, 0, -5.2252035466, -4.7919604252, 6.9488256686  
C, 0, -3.8637110307, -4.4748413628, 6.9538831224  
C, 0, -3.2347758963, -4.0517060368, 5.7872402297  
C, 0, -3.9658040323, -3.9395988711, 4.6006062415  
C, 0, -5.327684759, -4.2491991424, 4.5874848514  
H, 0, -7.005835638, -4.9155232021, 5.7452318112  
H, 0, -5.7130908664, -5.1243383529, 7.8572450626  
H, 0, -3.2899578455, -4.5600995526, 7.8697930001  
H, 0, -2.1810943153, -3.8032346164, 5.7648172972  
H, 0, -5.9105194395, -4.1552019574, 3.6806979226  
O, 0, -3.2703901299, -3.5094053981, 3.4877442132  
C, 0, -1.2861464845, -4.9552726322, -3.5382170349  
C, 0, -1.2561822945, -3.5036778342, -3.565953051  
C, 0, -1.0583538966, -5.6813220553, -4.7025782614  
C, 0, -0.9925875655, -2.837967088, -4.7462344144  
C, 0, -1.7450605923, -1.6378925811, -5.0860038673  
C, 0, -2.6832585126, -1.0736359712, -4.1852758909  
C, 0, -3.7128380076, -0.2911711583, -4.7658645632  
C, 0, -2.9175577075, -7.1943529439, -4.139111188  
C, 0, -3.1525071527, -6.4263332591, -2.9305710102

C, 0, -1.8963236348, -6.8316988871, -5.0111881942  
C, 0, -2.3566984076, -5.3378040657, -2.6355806736  
C, 0, -2.9622754889, -4.1263078557, -2.0994866752  
C, 0, -4.3387010472, -4.0700020893, -1.7651623206  
C, 0, -4.927574551, -2.7804775421, -1.7786676158  
C, 0, -2.9659117794, -1.7848862128, -2.9264148196  
C, 0, -2.2893735295, -3.0033528694, -2.6716089199  
C, 0, -4.251096857, -1.6545573868, -2.3447621623  
C, 0, -3.3863018486, -7.2129381923, -6.9337052041  
C, 0, -4.4475657899, -7.5872152579, -6.0174556873  
C, 0, -2.137651441, -6.8407907596, -6.4464861395  
C, 0, -4.2193195453, -7.5766640856, -4.6559865464  
C, 0, -5.2434666439, -7.0673708748, -3.7544623259  
C, 0, -6.5169493483, -6.6662054135, -4.2299467216  
C, 0, -7.2118680571, -5.7227479723, -3.4320062942  
C, 0, -5.1870673285, -5.2332686936, -2.0851324177  
C, 0, -4.5889593764, -6.3578608403, -2.7014707994  
C, 0, -6.5564857961, -5.0167387156, -2.3755431375  
C, 0, -2.0463227018, -4.9858743617, -8.061071943  
C, 0, -3.3512138514, -5.3775010821, -8.5601477658  
C, 0, -1.4487862553, -5.6970104463, -7.0254991289  
C, 0, -4.0041502688, -6.4623962284, -8.0105599606  
C, 0, -5.4384911427, -6.3977245222, -7.766298785  
C, 0, -6.2074038923, -5.2767622523, -8.1683237187  
C, 0, -7.4062351499, -5.0516536014, -7.4466092745  
C, 0, -6.7598190989, -6.675483645, -5.6832683026  
C, 0, -5.7104668126, -7.0866983807, -6.5429284087  
C, 0, -7.6777485114, -5.7401118757, -6.2228471482  
C, 0, -0.7504211463, -3.5893039325, -5.9640302971  
C, 0, -1.3792464426, -2.8551753088, -7.0458379694  
C, 0, -0.7826287294, -4.9794039232, -5.9486557009  
C, 0, -2.0109817694, -3.5356914552, -8.067479162  
C, 0, -3.2779918023, -3.0437830908, -8.5903231965  
C, 0, -3.8392693303, -1.8223118731, -8.1407742304  
C, 0, -5.245387141, -1.6976605623, -8.2697234676  
C, 0, -5.5098959748, -4.1180247181, -8.7548722163  
C, 0, -4.1004899693, -4.1737574594, -8.8923485052  
C, 0, -6.0674629686, -2.8279026671, -8.5718815764  
C, 0, -3.1645952332, -1.0957491253, -7.0501032945  
C, 0, -1.9826675095, -1.6487526414, -6.4964409133  
C, 0, -3.9497273422, -0.302160958, -6.1763141904  
C, 0, -7.3252454857, -1.3746178329, -7.2023155371  
C, 0, -6.0101763932, -0.7992981581, -7.4161367112  
C, 0, -5.3783312185, -0.1193911772, -6.394376218  
C, 0, -7.952671165, -1.2484197815, -5.9671882834  
C, 0, -8.6651581653, -3.602159353, -6.0738815613  
C, 0, -8.0036411381, -3.7263658419, -7.3593511961  
C, 0, -7.3511405075, -2.6412099488, -7.9093210496  
C, 0, -8.6407559386, -2.3923717076, -5.3874869752  
C, 0, -8.1970970719, -3.5826353484, -3.2790940093  
C, 0, -8.2194099801, -4.8401740696, -4.004029878  
C, 0, -8.4480978764, -4.8495876044, -5.3655342042  
C, 0, -8.4016669983, -2.3818180127, -3.951591524  
C, 0, -6.5665799234, -1.343657409, -2.6821133668  
C, 0, -6.3566970271, -2.6020771475, -1.993326666  
C, 0, -7.1529758906, -3.6923506391, -2.2781445866

C, 0, -7.5640584155, -1.2313590852, -3.6441703787  
C, 0, -6.0275924075, 0.0207809859, -5.1049247536  
C, 0, -4.9924541509, -0.1020641782, -4.0950761113  
C, 0, -5.2554409789, -0.7661201735, -2.9138483706  
C, 0, -7.2856249894, -0.5310986691, -4.8902424814

### **C70@2subphthalocyanine-1**

C, 0, -6.2962507457, 0.8197401798, 3.2612212584  
C, 0, -6.1471655099, -0.5833799193, 3.4756139287  
C, 0, -5.399116595, -1.062563722, 4.5507523981  
C, 0, -4.8263085729, -0.1343591269, 5.4152618972  
C, 0, -4.9792847918, 1.2505882387, 5.206332459  
C, 0, -5.7050974003, 1.7408511668, 4.1259713379  
C, 0, -6.963072531, 0.9906802524, 1.9802225362  
C, 0, -6.735254733, -1.263027178, 2.3303986684  
H, 0, -5.2615940764, -2.1279582793, 4.6916699252  
H, 0, -4.2421804594, -0.4791898023, 6.2604560319  
H, 0, -4.511132044, 1.9438149629, 5.8953182561  
H, 0, -5.7991131845, 2.8044349213, 3.9416447265  
C, 0, -6.677689776, 1.6788693593, -2.4340054321  
C, 0, -6.7074525806, 2.5748915551, -1.3233255774  
C, 0, -6.1998608305, 3.8691486262, -1.4362332135  
C, 0, -5.677191848, 4.2616081171, -2.6640906304  
C, 0, -5.6428262538, 3.3763356666, -3.7595975768  
C, 0, -6.1328666659, 2.078211431, -3.6544569606  
C, 0, -7.1224723262, 0.3782697845, -1.9551106223  
C, 0, -7.1568115148, 1.8144727847, -0.1681599186  
H, 0, -6.1993779061, 4.5342417785, -0.580929649  
H, 0, -5.2758630725, 5.2614483296, -2.7805574266  
H, 0, -5.2163977691, 3.7128749982, -4.6973516035  
H, 0, -6.0827023395, 1.3847979029, -4.4853425505  
C, 0, -6.0197130761, -3.6647576329, -0.3618437658  
C, 0, -6.1415660381, -3.155892647, -1.6898026602  
C, 0, -5.5173591142, -3.7986436074, -2.7585429918  
C, 0, -4.7938892416, -4.9585163005, -2.4944757212  
C, 0, -4.6743424686, -5.4608368433, -1.1849734947  
C, 0, -5.2746425495, -4.8157246368, -0.1070370884  
C, 0, -6.6524338771, -2.7013609604, 0.5303723881  
C, 0, -6.8485803454, -1.8847214481, -1.6034340297  
H, 0, -5.5910770584, -3.3925616465, -3.7604394641  
H, 0, -4.3043200633, -5.4804596681, -3.3082438888  
H, 0, -4.0956496792, -6.360971971, -1.0138190552  
H, 0, -5.1631954494, -5.1837364785, 0.9059636369  
N, 0, -7.1985020471, -1.7498858199, -0.2873896809  
N, 0, -7.3017745084, -0.2735374146, 1.5608833873  
N, 0, -7.5009355643, 0.5736761783, -0.6472278373  
N, 0, -6.4856391007, -2.4931297893, 1.8479579422  
N, 0, -6.9564885675, 2.0440571186, 1.1424998951  
N, 0, -6.8783606737, -0.8458592507, -2.456192919

B, 0, -7.9637987157, -0.5660016876, 0.230690602  
C, 0, -11.504904753, 1.9792580366, 1.1802840287  
C, 0, -12.7552528103, 1.4813206749, 0.8189031013  
C, 0, -12.8485305398, 0.2004782448, 0.2666282814  
C, 0, -11.7053127826, -0.5684354346, 0.0754360073  
C, 0, -10.4536088706, -0.0618231639, 0.4375563069  
C, 0, -10.3510284812, 1.2146014485, 0.9949417713  
H, 0, -11.4178743061, 2.9695292959, 1.6130841708  
H, 0, -13.6460988417, 2.0800541901, 0.9662212831  
H, 0, -13.815300864, -0.1993104414, -0.0178164894  
H, 0, -11.7508044253, -1.5624835595, -0.3513955867  
H, 0, -9.3910695293, 1.614886663, 1.294340036  
O, 0, -9.3703036971, -0.8898136244, 0.2204387303  
C, 0, 3.488475307, -0.4554316062, 1.6838044768  
C, 0, 2.9384237193, 0.7846176615, 2.197636114  
C, 0, 4.0612158198, -0.4992322649, 0.4181243969  
C, 0, 2.9789824266, 1.9291754529, 1.4278166683  
C, 0, 1.8291424944, 2.8213950902, 1.3924549897  
C, 0, 0.6917546876, 2.5905376445, 2.2061882635  
C, 0, -0.5303333165, 3.1364631944, 1.7380925118  
C, 0, 2.9482182787, -2.6489672255, -0.0264359072  
C, 0, 2.3529765922, -2.5924668049, 1.2953867934  
C, 0, 3.780443865, -1.6232092601, -0.4612687382  
C, 0, 2.6195243658, -1.5257308389, 2.1314293729  
C, 0, 1.5491137101, -0.9443643524, 2.9306243013  
C, 0, 0.2487937631, -1.508276701, 2.9447590008  
C, 0, -0.8102594023, -0.6259515933, 3.2759050943  
C, 0, 0.6485472605, 1.3678952766, 3.0293806923  
C, 0, 1.7459659719, 0.4723784073, 2.9726245355  
C, 0, -0.6132997185, 0.7901896835, 3.3175270642  
C, 0, 2.6934837854, -1.648819508, -2.6700695833  
C, 0, 1.82129178, -2.7121820061, -2.2068598256  
C, 0, 3.647925041, -1.1093303618, -1.8158084025  
C, 0, 1.9447007993, -3.1976190653, -0.9195416062  
C, 0, 0.7514488256, -3.5008847295, -0.1420377232  
C, 0, -0.5448083433, -3.4030455648, -0.7069633046  
C, 0, -1.6073137443, -3.1845115922, 0.2056696052  
C, 0, -0.0368103052, -2.6472859596, 2.0524703182  
C, 0, 1.0013690534, -3.1294098069, 1.216589988  
C, 0, -1.3574889156, -2.8120150984, 1.5642736693  
C, 0, 3.0851653486, 1.1596646237, -2.588303649  
C, 0, 2.0811902854, 0.5896432942, -3.4679562395  
C, 0, 3.8500361505, 0.3303867893, -1.7753312128  
C, 0, 1.8910307997, -0.7776985879, -3.508857465  
C, 0, 0.540235829, -1.3198093128, -3.5779908284  
C, 0, -0.5906206799, -0.4745149417, -3.701710758  
C, 0, -1.8189636206, -1.0016610386, -3.2292328195  
C, 0, -0.6768201406, -2.884162332, -2.0811439486  
C, 0, 0.4979435466, -2.5068907488, -2.7796095849  
C, 0, -1.8608603506, -2.1879086411, -2.4309882114  
C, 0, 3.5719535259, 1.8912125911, 0.1045007374  
C, 0, 2.7707598631, 2.7495859516, -0.7452384192  
C, 0, 4.1064757231, 0.7079546762, -0.3939826657  
C, 0, 2.5309222685, 2.390380273, -2.0566077479  
C, 0, 1.2063833313, 2.5866081536, -2.6291281591  
C, 0, 0.1737584508, 3.2306243916, -1.9013851827

C,0,-1.1523249817,2.9051453975,-2.2816387543  
C,0,-0.3874831323,0.9851301998,-3.6580223858  
C,0,0.9299963974,1.4813699374,-3.494019592  
C,0,-1.4285030605,1.7999140376,-3.1473316373  
C,0,0.4313294625,3.614274678,-0.5008205157  
C,0,1.7008021868,3.324507623,0.0587714501  
C,0,-0.6584425051,3.6404182121,0.4059401782  
C,0,-3.2422315432,2.0106244096,-1.6544868239  
C,0,-2.2646427312,3.0372367678,-1.3501782546  
C,0,-2.024360985,3.3975795476,-0.0387423  
C,0,-3.9363447504,1.3814269284,-0.6273269112  
C,0,-3.632330237,-0.7944564914,-1.7358701626  
C,0,-2.9062067879,-0.1313489883,-2.8020244762  
C,0,-2.7147721281,1.2357257764,-2.7605191108  
C,0,-4.1399789765,-0.0590179945,-0.6696634691  
C,0,-3.3804685314,-1.7929532385,0.9050958498  
C,0,-2.8497661596,-2.5505723941,-0.2128502608  
C,0,-2.972206863,-2.0636885487,-1.4988514142  
C,0,-4.0102368051,-0.5715843615,0.6865504208  
C,0,-2.8310224564,0.3966405794,2.6190914226  
C,0,-2.1759246447,-0.8781890857,2.8358903833  
C,0,-2.4444904144,-1.9465109838,2.0024415283  
C,0,-3.7248546734,0.5528263472,1.5659062066  
C,0,-2.7505652555,2.7496450232,1.0382010726  
C,0,-1.8148804373,2.5763520712,2.1340418232  
C,0,-1.8550753342,1.4305441596,2.9040987207  
C,0,-3.6858467332,1.7605802832,0.7553369432  
C,0,6.2617320978,-1.8122820126,2.6839031859  
C,0,6.129182262,-0.5336417354,3.3048337179  
C,0,5.3951756439,-0.387373536,4.481755064  
C,0,4.8169236308,-1.5238054871,5.0391320776  
C,0,4.9511596015,-2.7858274283,4.4280098691  
C,0,5.66329992,-2.9411556328,3.2427203935  
C,0,6.9241973429,-1.6044671319,1.4050624831  
C,0,6.7085542298,0.449451728,2.4010938256  
H,0,5.2710549578,0.5903843184,4.931854675  
H,0,4.2438496077,-1.4390090696,5.9549776974  
H,0,4.4782784149,-3.6470324681,4.8850839596  
H,0,5.7425966371,-3.9037421271,2.7518633646  
C,0,6.6917074414,-0.9491049859,-3.0268154375  
C,0,6.6859428627,-2.1320270673,-2.2274901402  
C,0,6.1818319616,-3.3314843055,-2.7315704895  
C,0,5.701088122,-3.3421783374,-4.0364337816  
C,0,5.700285264,-2.1732370482,-4.8238963206  
C,0,6.1842742637,-0.9674644508,-4.3264266702  
C,0,7.1306630511,0.1478816912,-2.1753069395  
C,0,7.1179035537,-1.7534373777,-0.8907899492  
H,0,6.1570388605,-4.2191399105,-2.110887404  
H,0,5.3078307482,-4.2613157214,-4.4544910157  
H,0,5.3065261301,-2.2165016279,-5.8325191614  
H,0,6.1629039867,-0.0605288392,-4.9185909566  
C,0,6.0864940528,3.5684666215,0.533693325  
C,0,6.2278493271,3.4776412889,-0.8854844226  
C,0,5.6437613426,4.4285619906,-1.7202069909  
C,0,4.9323182114,5.4704010843,-1.1310188087  
C,0,4.7844378338,5.554483978,0.2663605145

C, 0, 5.3517018826, 4.603455232, 1.1103571623  
C, 0, 6.6708979956, 2.3617940899, 1.1046767949  
C, 0, 6.8937523425, 2.2133828153, -1.1729206769  
H, 0, 5.7330990862, 4.3423694482, -2.7965651223  
H, 0, 4.4711968527, 6.2244836277, -1.7579712572  
H, 0, 4.2105651131, 6.3705211801, 0.6896373795  
H, 0, 5.2191019555, 4.6486065566, 2.1848101426  
N, 0, 7.2146178846, 1.6853740315, 0.0478096733  
N, 0, 7.2732291881, -0.2761676588, 1.3776823978  
N, 0, 7.4784517418, -0.4310418499, -0.9769545768  
N, 0, 6.4695593262, 1.769346419, 2.2969248883  
N, 0, 6.9127066303, -2.362270921, 0.2923282206  
N, 0, 6.9164509476, 1.4703058955, -2.2949928689  
B, 0, 7.9515352565, 0.3872965722, 0.2018946996  
C, 0, 11.4427290798, -2.3579527595, 0.6997134727  
C, 0, 12.7055561135, -1.7750043749, 0.7842819902  
C, 0, 12.8237158226, -0.3841794163, 0.7073803709  
C, 0, 11.6934544814, 0.4105242229, 0.547825644  
C, 0, 10.4290031786, -0.180941617, 0.4635113657  
C, 0, 10.3012244801, -1.5693678563, 0.5392054606  
H, 0, 11.3361399757, -3.4353905626, 0.7577575876  
H, 0, 13.5865195328, -2.3933296201, 0.9084366516  
H, 0, 13.8002559594, 0.0821914517, 0.77289249  
H, 0, 11.7577038405, 1.4896035453, 0.485637769  
H, 0, 9.3309331983, -2.0433159044, 0.4742447093  
O, 0, 9.361471289, 0.6793180845, 0.3049782569

### **C70@2subphthalocyanine-2**

C, 0, -4.780971, 3.610438, -0.828416  
C, 0, -4.682595, 3.784513, 0.58453  
C, 0, -3.724811, 4.641327, 1.130262  
C, 0, -2.887633, 5.329047, 0.258457  
C, 0, -2.982669, 5.153913, -1.13713  
C, 0, -3.920347, 4.289759, -1.692239  
C, 0, -5.723907, 2.529596, -1.067866  
C, 0, -5.56333, 2.80595, 1.205307  
H, 0, -3.631885, 4.743798, 2.205019  
H, 0, -2.137057, 6.001777, 0.656538  
H, 0, -2.30277, 5.694143, -1.78547  
H, 0, -3.9755, 4.124494, -2.761717  
C, 0, -6.481964, -1.816031, -1.849434  
C, 0, -6.219814, -0.721206, -2.727636  
C, 0, -5.761106, -0.944226, -4.025922  
C, 0, -5.585395, -2.260655, -4.441836  
C, 0, -5.841167, -3.340079, -3.574754  
C, 0, -6.280927, -3.129912, -2.270401  
C, 0, -6.824435, -1.257765, -0.548335  
C, 0, -6.386577, 0.501806, -1.953934  
H, 0, -5.536679, -0.109444, -4.679143  
H, 0, -5.234806, -2.461967, -5.447311  
H, 0, -5.683069, -4.35172, -3.929644

H, 0, -6.45568, -3.955388, -1.590766  
C, 0, -5.704562, 0.019991, 3.62137  
C, 0, -6.066067, -1.246122, 3.064862  
C, 0, -5.789933, -2.428431, 3.748393  
C, 0, -5.178333, -2.337502, 4.997097  
C, 0, -4.827915, -1.091434, 5.547692  
C, 0, -5.073961, 0.09587, 4.862289  
C, 0, -6.007361, 1.034243, 2.61697  
C, 0, -6.60839, -0.996503, 1.734387  
H, 0, -6.042419, -3.386736, 3.310271  
H, 0, -4.959937, -3.241734, 5.552913  
H, 0, -4.347442, -1.057753, 6.518503  
H, 0, -4.778451, 1.055571, 5.269353  
N, 0, -6.638406, 0.363155, 1.605405  
N, 0, -6.223997, 2.192558, 0.166163  
N, 0, -6.878486, 0.102343, -0.734903  
N, 0, -5.523191, 2.277031, 2.443055  
N, 0, -5.868084, 1.728876, -2.142445  
N, 0, -6.766368, -1.812898, 0.675741  
B, 0, -7.18965, 1.053244, 0.393325  
C, 0, -10.248942, 2.974169, -2.240506  
C, 0, -11.561647, 3.000181, -1.77343  
C, 0, -11.848449, 2.480903, -0.507659  
C, 0, -10.834947, 1.941467, 0.277376  
C, 0, -9.519991, 1.917035, -0.197891  
C, 0, -9.223308, 2.436273, -1.4597  
H, 0, -10.0125, 3.375531, -3.219589  
H, 0, -12.35131, 3.41967, -2.385105  
H, 0, -12.865268, 2.496046, -0.131956  
H, 0, -11.029601, 1.531488, 1.260483  
H, 0, -8.209668, 2.43331, -1.838459  
O, 0, -8.576381, 1.366585, 0.645477  
C, 0, 0.075822, 0.994324, -3.379874  
C, 0, -0.935576, 1.628873, -2.554511  
C, 0, -0.184487, -0.227482, -3.993525  
C, 0, -2.163039, 1.02029, -2.378249  
C, 0, -2.782512, 1.019073, -1.060935  
C, 0, -2.208736, 1.718058, 0.028202  
C, 0, -2.554994, 1.24758, 1.317845  
C, 0, 2.058473, -1.030744, -3.37475  
C, 0, 2.319631, 0.244686, -2.733515  
C, 0, 0.834928, -1.267796, -3.992052  
C, 0, 1.355209, 1.231276, -2.736235  
C, 0, 1.128499, 2.027463, -1.536388  
C, 0, 1.941806, 1.876975, -0.385909  
C, 0, 1.358142, 2.254771, 0.84783  
C, 0, -0.905441, 2.376287, -0.160169  
C, 0, -0.275525, 2.273899, -1.426315  
C, 0, -0.045647, 2.501339, 0.960101  
C, 0, 0.766593, -3.526272, -3.013008  
C, 0, 2.042276, -3.270087, -2.371382  
C, 0, 0.170345, -2.549211, -3.804271  
C, 0, 2.670247, -2.053672, -2.547333  
C, 0, 3.319408, -1.405515, -1.416598  
C, 0, 3.413715, -2.038357, -0.153303  
C, 0, 3.549103, -1.177244, 0.963506

C, 0, 2.973183, 0.824131, -0.384285  
C, 0, 3.104744, 0.003161, -1.53093  
C, 0, 3.337003, 0.232042, 0.850439  
C, 0, -2.016538, -3.045167, -2.790545  
C, 0, -1.386355, -4.058368, -1.965136  
C, 0, -1.259284, -2.303295, -3.692073  
C, 0, -0.030077, -4.293405, -2.074154  
C, 0, 0.763083, -4.525789, -0.874064  
C, 0, 0.159488, -4.611007, 0.405832  
C, 0, 0.992107, -4.296791, 1.509427  
C, 0, 2.744231, -3.337782, 0.035655  
C, 0, 2.265092, -3.670983, 1.327481  
C, 0, -2.441844, -0.251922, -3.017181  
C, 0, -3.21965, -1.035103, -2.075841  
C, 0, -1.478158, -0.867652, -3.808245  
C, 0, -3.01802, -2.394816, -1.967467  
C, 0, -3.021033, -3.025365, -0.653785  
C, 0, -3.329533, -2.292035, 0.519388  
C, 0, -2.79292, -2.798066, 1.729941  
C, 0, -1.289088, -4.361434, 0.521286  
C, 0, -2.018173, -4.045507, -0.652519  
C, 0, -1.789688, -3.818083, 1.731037  
C, 0, -3.54506, -0.837687, 0.400961  
C, 0, -3.440107, -0.237019, -0.87842  
C, 0, -3.208649, -0.009943, 1.500959  
C, 0, -1.402498, -2.433875, 3.603964  
C, 0, -2.553456, -1.932129, 2.877436  
C, 0, -2.754133, -0.572729, 2.763546  
C, 0, -0.501628, -1.549558, 4.190432  
C, 0, 1.380817, -2.914527, 3.382727  
C, 0, 0.435374, -3.829324, 2.772169  
C, 0, -0.92116, -3.594689, 2.879292  
C, 0, 0.927366, -1.795941, 4.075079  
C, 0, 2.673176, -0.418815, 3.018872  
C, 0, 3.13242, -1.589847, 2.295787  
C, 0, 2.508262, -2.806196, 2.474952  
C, 0, 1.592374, -0.513576, 3.889082  
C, 0, 0.691814, 1.606017, 3.017388  
C, 0, 1.822357, 1.695326, 2.111441  
C, 0, 2.788068, 0.709103, 2.113181  
C, 0, 0.573637, 0.526368, 3.887911  
C, 0, -1.82699, 0.358753, 3.377206  
C, 0, -1.696115, 1.483543, 2.469339  
C, 0, -0.469043, 2.092147, 2.29336  
C, 0, -0.720451, -0.114036, 4.073932  
C, 0, 4.786536, 3.593886, 0.565539  
C, 0, 4.660022, 3.672301, -0.855824  
C, 0, 3.738086, 4.539496, -1.441086  
C, 0, 2.966502, 5.339417, -0.603114  
C, 0, 3.090933, 5.262752, 0.797149  
C, 0, 3.990602, 4.384643, 1.39484  
C, 0, 5.727753, 2.5229, 0.858927  
C, 0, 5.511015, 2.63663, -1.425063  
H, 0, 3.625503, 4.573137, -2.518193  
H, 0, 2.248432, 6.027952, -1.03285  
H, 0, 2.465901, 5.892531, 1.419348



H, 0, 4.070732, 4.301832, 2.472277  
C, 0, 6.558823, -1.754634, 1.925257  
C, 0, 6.297946, -0.602312, 2.729292  
C, 0, 5.884127, -0.738351, 4.054266  
C, 0, 5.746799, -2.02419, 4.569794  
C, 0, 5.990144, -3.158824, 3.773421  
C, 0, 6.386587, -3.036923, 2.44424  
C, 0, 6.860343, -1.28696, 0.57828  
C, 0, 6.426679, 0.563909, 1.866702  
H, 0, 5.665792, 0.13755, 4.653634  
H, 0, 5.433334, -2.15721, 5.598536  
H, 0, 5.858547, -4.144576, 4.203842  
H, 0, 6.556439, -3.90723, 1.821586  
C, 0, 5.641765, -0.317657, -3.647876  
C, 0, 6.060616, -1.536346, -3.026241  
C, 0, 5.828811, -2.764052, -3.643172  
C, 0, 5.201804, -2.766492, -4.886971  
C, 0, 4.790043, -1.568818, -5.498443  
C, 0, 4.993401, -0.336315, -4.88104  
C, 0, 5.929388, 0.766761, -2.714824  
C, 0, 6.597243, -1.189941, -1.714138  
H, 0, 6.1266, -3.686156, -3.158472  
H, 0, 5.019049, -3.708222, -5.390927  
H, 0, 4.295551, -1.609219, -6.461847  
H, 0, 4.654705, 0.587036, -5.335889  
N, 0, 6.585174, 0.175439, -1.671915  
N, 0, 6.195867, 2.100232, -0.359746  
N, 0, 6.891615, 0.08377, 0.667693  
N, 0, 5.441834, 2.018429, -2.619016  
N, 0, 5.90632, 1.800866, 1.982599  
N, 0, 6.791733, -1.927113, -0.603744  
B, 0, 7.161965, 0.955791, -0.531491  
C, 0, 10.223462, 3.251373, 1.781191  
C, 0, 11.480254, 3.403159, 1.198534  
C, 0, 11.726119, 2.836739, -0.055706  
C, 0, 10.727139, 2.129612, -0.716313  
C, 0, 9.467591, 1.981401, -0.12634  
C, 0, 9.212998, 2.542759, 1.126713  
H, 0, 10.019859, 3.685367, 2.753681  
H, 0, 12.258668, 3.954121, 1.712533  
H, 0, 12.699393, 2.947957, -0.520245  
H, 0, 10.890753, 1.682043, -1.688538  
H, 0, 8.245087, 2.436443, 1.598685  
O, 0, 8.53577, 1.266968, -0.85136

### **C60@2subphthalocyanine-SC2H5**

C, 0, -6.6739903215, -2.3662870477, 1.4986489574  
C, 0, -6.0538082809, -1.0953471797, 1.3325036201  
C, 0, -6.815668901, 0.0216494193, 0.9999249107  
C, 0, -8.1898666162, -0.1254552558, 0.8090852548  
C, 0, -8.8050061625, -1.3947325367, 0.9604525814  
C, 0, -8.0443480165, -2.5138457001, 1.3025939463  
C, 0, -5.6174158758, -3.3401442288, 1.7355577021  
C, 0, -4.6154834125, -1.2953799617, 1.4359107773

H, 0, -6.352074963, 0.9965528454, 0.9158789536  
H, 0, -8.5172670788, -3.4841043828, 1.3960249511  
C, 0, -2.8504040961, -6.4507492175, 0.1366651253  
C, 0, -4.1712971766, -6.5416896567, 0.6588996765  
C, 0, -4.9692746773, -7.6430440878, 0.3447527051  
C, 0, -4.4750700037, -8.6056124313, -0.5287097143  
C, 0, -3.197687343, -8.4542666631, -1.1333782704  
C, 0, -2.372775445, -7.390148963, -0.7752658434  
C, 0, -2.2970310357, -5.1726590875, 0.5590198124  
C, 0, -4.4467455891, -5.2939931762, 1.3526567124  
H, 0, -5.9567750173, -7.7575715681, 0.7756035957  
H, 0, -1.3860347072, -7.2536629184, -1.1980390734  
C, 0, -1.3929715113, -0.8569542397, -0.3045480065  
C, 0, -0.6820656884, -2.0609671518, -0.5822496088  
C, 0, 0.336439369, -2.0793582776, -1.5316180182  
C, 0, 0.6511862229, -0.9041998986, -2.2119567656  
C, 0, -0.0194499195, 0.3062760292, -1.8984602586  
C, 0, -1.0539330134, 0.3242005014, -0.9626664604  
C, 0, -2.4533272605, -1.189148585, 0.6390075398  
C, 0, -1.3002512894, -3.123549716, 0.1981534967  
H, 0, 0.8968713114, -2.9875316124, -1.710995843  
H, 0, -1.5716780602, 1.2507151979, -0.7457904187  
N, 0, -2.2509317997, -2.5028017963, 0.9602496076  
N, 0, -4.4552438182, -2.6127804246, 1.8021650974  
N, 0, -3.256241622, -4.6080218764, 1.3665064788  
N, 0, -3.6093750325, -0.5621608948, 0.9300253821  
N, 0, -5.620562809, -4.6786209504, 1.5930592516  
N, 0, -1.2833566571, -4.4597437115, 0.0386608286  
B, 0, -3.0871170384, -3.2338769622, 1.9714522831  
C, 0, -4.2504537177, -4.9575291758, 5.9202231133  
C, 0, -3.3339130298, -4.8319681076, 6.9621543187  
C, 0, -2.1380467285, -4.1415933553, 6.7435286873  
C, 0, -1.8631553512, -3.5868501221, 5.4977995073  
C, 0, -2.7868043788, -3.7179579463, 4.4571312827  
C, 0, -3.9848693969, -4.4033300022, 4.6659290658  
H, 0, -5.1829960161, -5.4876550391, 6.0767086135  
H, 0, -3.5468159351, -5.2641538552, 7.9323240042  
H, 0, -1.4171277739, -4.0357512487, 7.5461704669  
H, 0, -0.94452348, -3.0479835594, 5.3029606092  
H, 0, -4.7137919795, -4.5064459406, 3.8729800201  
O, 0, -2.4394000166, -3.1342235539, 3.2526643224  
C, 0, -5.5896997519, -3.7916320724, -1.4900597886  
C, 0, -7.009922865, -3.7731396411, -1.8138113354  
C, 0, -7.5667881053, -4.8185184963, -2.539437174  
C, 0, -6.73201119, -5.9317237633, -2.9718316479  
C, 0, -5.3800773126, -5.9564434821, -2.6565502511  
C, 0, -4.7967159304, -4.8533966337, -1.9056784439  
C, 0, -5.0862598306, -2.4280269206, -1.5890330738  
C, 0, -6.1951471465, -1.5652706788, -1.9760904945  
C, 0, -7.3829803321, -2.3967814663, -2.1159678142  
C, 0, -8.2966269585, -2.1325306456, -3.1300303354  
C, 0, -8.5258200136, -4.5396117984, -3.6001574357  
C, 0, -7.1794498342, -6.3462478421, -4.294370078  
C, 0, -6.2542715407, -6.764397965, -5.2439450319  
C, 0, -4.8332354895, -6.7870049489, -4.915019215  
C, 0, -4.4073955144, -6.3914351836, -3.6518799966

C, 0, -3.2210399399, -5.5557173924, -3.5115975865  
C, 0, -3.4652875079, -4.6046994828, -2.4354428899  
C, 0, -2.9853616892, -3.3071004577, -2.5262587795  
C, 0, -3.8145344167, -2.1912020556, -2.0936883384  
C, 0, -5.9764045005, -0.5093230938, -2.8517992295  
C, 0, -4.6399113628, -0.2583106985, -3.3784197595  
C, 0, -3.5824460023, -1.0782269557, -3.0057839858  
C, 0, -2.6074206259, -1.5084243741, -4.0011400913  
C, 0, -2.2380725456, -2.8863498372, -3.7025516137  
C, 0, -2.0132912573, -3.7889171143, -4.7353622656  
C, 0, -2.5122755057, -5.1556747933, -4.6380483747  
C, 0, -2.9601796331, -5.5670540769, -5.9618656929  
C, 0, -4.0933421817, -6.3612909146, -6.0973620449  
C, 0, -8.2852050513, -5.48076166, -4.6840579011  
C, 0, -5.949122374, -4.1618063234, -8.4281679998  
C, 0, -7.2225615081, -4.397260761, -7.9212120692  
C, 0, -8.0564009807, -3.2791957388, -7.493312766  
C, 0, -7.5774387394, -1.9773182085, -7.5887991722  
C, 0, -6.2389424509, -1.7306453687, -8.1142658866  
C, 0, -4.0273132389, -2.8134267027, -8.1848642089  
C, 0, -3.6539003676, -4.1885899985, -7.8839983362  
C, 0, -4.8406996322, -5.0200421805, -8.027483311  
C, 0, -5.0570185998, -6.074905814, -7.1515920483  
C, 0, -6.3916782634, -6.3273982714, -6.6268578694  
C, 0, -7.448094936, -5.5062132784, -7.0013680034  
C, 0, -8.7925977952, -3.6986368184, -6.3079231516  
C, 0, -9.017946917, -2.7992368913, -5.2727071685  
C, 0, -8.5159466544, -1.4357591955, -5.3718065438  
C, 0, -7.8123922309, -1.0343689943, -6.5014814352  
C, 0, -6.6214177349, -0.2067099003, -6.3568084383  
C, 0, -5.6503150419, -0.636184719, -7.3527891442  
C, 0, -4.2969682642, -0.6521960254, -7.038000749  
C, 0, -3.4642739616, -1.7669791722, -7.466246362  
C, 0, -2.7359944477, -4.4555964918, -6.8772329671  
C, 0, -2.1464830765, -3.3588942947, -6.1195452518  
C, 0, -2.5037231813, -2.0453922522, -6.4061502561  
C, 0, -2.737848523, -1.0977077551, -5.3244165073  
C, 0, -3.8501924198, -0.2397226249, -5.7147503666  
C, 0, -4.7770003691, 0.1706333443, -4.7647318707  
C, 0, -6.1953316227, 0.1875253423, -5.0941234428  
C, 0, -6.9351954601, -0.2333349066, -3.9124874789  
C, 0, -8.0695362653, -1.0241804395, -4.0481328966  
C, 0, -8.4176064067, -5.0721164454, -6.0051441662  
C, 0, -8.8837173964, -3.228908069, -3.8884209363  
C, 0, -5.4449548497, -2.7946849425, -8.5216453577  
C, 0, -2.827951046, -4.7313986873, -10.9422290808  
C, 0, -3.3856079611, -3.4730911941, -11.3092792163  
C, 0, -2.659869917, -2.2994709884, -11.126542149  
C, 0, -1.3672333179, -2.3760409425, -10.6092320282  
C, 0, -0.7884927442, -3.6341600686, -10.2962898098  
C, 0, -1.5227969602, -4.8086332588, -10.4616705555  
C, 0, -3.8807286912, -5.7266080485, -11.0722861839  
C, 0, -4.7704270034, -3.702849444, -11.6888077792  
H, 0, -3.0998148848, -1.3360839782, -11.3545492066  
H, 0, -1.0724054584, -5.7704142107, -10.2510639033  
C, 0, -7.2549374828, -8.1578869011, -9.3581870994

C,0,-5.8411511045,-8.3114917395,-9.3285478339  
C,0,-5.227984931,-9.0812044083,-8.3385256114  
C,0,-6.0301864453,-9.7489714533,-7.4143636316  
C,0,-7.4467042752,-9.6970250806,-7.5299275848  
C,0,-8.0560525197,-8.8793530973,-8.4728647427  
C,0,-7.5608637856,-7.1056173659,-10.3107700693  
C,0,-5.2847170473,-7.3993349749,-10.3187244428  
H,0,-4.1471405165,-9.1186318696,-8.294391711  
H,0,-9.1366620501,-8.8170617934,-8.521915319  
C,0,-8.28860651,-2.7477083397,-11.1055278916  
C,0,-9.1587488413,-3.8018967479,-10.7001658636  
C,0,-10.4164944286,-3.516933765,-10.1774785127  
C,0,-10.8329175175,-2.1856177884,-10.0957230466  
C,0,-9.9601432462,-1.1373634056,-10.4794563487  
C,0,-8.6878927858,-1.4197072105,-10.981243714  
C,0,-7.0464295305,-3.3590056985,-11.5620997677  
C,0,-8.4416498951,-5.0565103907,-10.9006924123  
H,0,-11.0806997023,-4.3129677082,-9.8633794355  
H,0,-8.0422272864,-0.615508331,-11.3134243916  
N,0,-7.2711978836,-4.7068403966,-11.5126650868  
N,0,-4.9383144733,-5.0659936659,-11.6496275191  
N,0,-6.3669340704,-6.8099534726,-10.9258765848  
N,0,-5.8116664989,-2.8509477171,-11.7150947533  
N,0,-4.0372909956,-6.9110986455,-10.4511356246  
N,0,-8.6196544366,-6.2749208949,-10.3598878624  
B,0,-6.2610644304,-5.7205036747,-11.9672681719  
C,0,-4.2028597945,-8.5723757481,-14.7190675746  
C,0,-4.6882633092,-8.6605395759,-16.0223256143  
C,0,-5.7828884329,-7.8776376343,-16.4004470071  
C,0,-6.382262498,-7.0181514381,-15.4858996862  
C,0,-5.8894708281,-6.934486021,-14.1805071049  
C,0,-4.7975557681,-7.712816796,-13.7922198839  
H,0,-3.355080884,-9.1747823767,-14.4129842545  
H,0,-4.2220243627,-9.3301767021,-16.7348511016  
H,0,-6.1703058862,-7.9372618936,-17.4111029729  
H,0,-7.230989649,-6.4011846809,-15.7529812243  
H,0,-4.4068116725,-7.6622471965,-12.7840726756  
O,0,-6.5434140662,-6.0559536271,-13.3374686472  
S,0,-10.6102066907,-1.6609093124,0.8094130938  
S,0,-9.1707773431,1.372946126,0.409561716  
S,0,0.5086548302,1.9147001968,-2.6024170809  
S,0,1.9815340036,-0.9511306339,-3.4777095476  
S,0,-2.7326929051,-9.6669406558,-2.4149075156  
S,0,-5.4754293619,-10.1044292517,-0.8608255966  
S,0,-8.5100152961,-10.7572869291,-6.4779685533  
S,0,-5.3497816223,-10.6656668976,-5.9889308267  
S,0,0.9727986389,-3.7747168806,-9.7937154413  
S,0,-0.4757702325,-0.7877288583,-10.428211607  
S,0,-10.4914455335,0.6192030172,-10.4358852656  
S,0,-12.5910194706,-1.9360461003,-9.6359794499  
C,0,-12.4784468343,-0.9244643201,-8.0514711175  
H,0,-12.1945218008,0.0924843805,-8.3236833505  
H,0,-13.5093666104,-0.9149289324,-7.690398071  
C,0,-11.5324453234,-1.5427714567,-7.0371865296  
H,0,-10.524273669,-1.638069834,-7.4566580997  
H,0,-11.4667854613,-0.9189711952,-6.138460227

H, 0, -11.863855932, -2.5429670699, -6.7444001255  
C, 0, -9.6109645891, 1.1974193189, -8.8625050405  
H, 0, -10.1224430704, 2.1306564881, -8.6147901713  
H, 0, -9.8236480687, 0.4679830652, -8.0757701486  
C, 0, -8.1177607079, 1.4113253831, -9.0439125142  
H, 0, -7.6818777641, 1.8225957681, -8.1266476909  
H, 0, -7.6067105981, 0.4681884455, -9.2605592359  
H, 0, -7.9183966664, 2.1064269091, -9.8635300542  
C, 0, -8.7519747404, -9.6022666359, -5.0047322532  
H, 0, -9.1178281205, -10.2550341049, -4.2080725317  
H, 0, -7.7619522599, -9.2327679727, -4.7249927933  
C, 0, -9.7229449448, -8.476097428, -5.3119081396  
H, 0, -9.3370053445, -7.8380788105, -6.1143772142  
H, 0, -10.693584097, -8.8705325689, -5.6233321199  
H, 0, -9.8744346584, -7.8447371274, -4.4287905555  
C, 0, -3.5121820593, -10.308498161, -6.1225016347  
H, 0, -3.1619219766, -10.4911640954, -5.1042935135  
H, 0, -3.3809332196, -9.2414578657, -6.3255194877  
C, 0, -2.7989573279, -11.2047679595, -7.1267892695  
H, 0, -1.7310504998, -10.9647686547, -7.1581496256  
H, 0, -2.9079429519, -12.2539596846, -6.8434111683  
H, 0, -3.2035937066, -11.0927051279, -8.1360995654  
C, 0, 0.8235924262, -4.2614807056, -7.9739728722  
H, 0, 1.8435651485, -4.1245946156, -7.6034296297  
H, 0, 0.1818543496, -3.5265231307, -7.4806752822  
C, 0, 0.334576205, -5.6807423477, -7.7347009071  
H, 0, 0.339181509, -5.9053975126, -6.6607486071  
H, 0, -0.6905188801, -5.8136376128, -8.08893428  
H, 0, 0.9759213612, -6.4062744813, -8.2419146389  
C, 0, -0.0810128767, -0.8070869428, -8.5787775362  
H, 0, 1.0001333168, -0.9156200202, -8.4815305865  
H, 0, -0.5619229281, -1.7006600718, -8.1772142704  
C, 0, -0.6043212271, 0.4476993707, -7.8965162327  
H, 0, -1.6904043708, 0.5269452287, -8.0040357139  
H, 0, -0.3617326129, 0.4154815111, -6.8278408957  
H, 0, -0.1552464855, 1.3503570506, -8.3197842972  
C, 0, -0.2163055087, 1.7457906639, -4.3345850134  
H, 0, 0.388339531, 2.4050221206, -4.9609455377  
H, 0, -0.0295254167, 0.7146750079, -4.6447178368  
C, 0, -1.6914276911, 2.1037852427, -4.3758733092  
H, 0, -2.0877372589, 1.9761126894, -5.3896463461  
H, 0, -2.2652576943, 1.4597153761, -3.6999906462  
H, 0, -1.8516135753, 3.1405761189, -4.0697630589  
C, 0, -10.9182192965, -1.1656013002, -0.9900471654  
H, 0, -11.5059530558, -0.2473999255, -0.9730932953  
H, 0, -9.939277862, -0.9473753491, -1.4189440584  
C, 0, -11.6093445992, -2.2923757876, -1.7434248428  
H, 0, -11.7951082395, -1.992834655, -2.781244803  
H, 0, -10.9888594356, -3.1927389072, -1.7498831162  
H, 0, -12.5695157472, -2.545975905, -1.2860593022  
C, 0, -8.6375604708, 1.6570502171, -1.3856941579  
H, 0, -9.4533270011, 2.2531285128, -1.8014436876  
H, 0, -8.6386108297, 0.6836678086, -1.8818726721  
C, 0, -7.3002458218, 2.3629983693, -1.5406361824  
H, 0, -6.4764442399, 1.7472290116, -1.1700189061  
H, 0, -7.108061321, 2.5644865318, -2.6011107602

H, 0, -7.2935078495, 3.3137756254, -1.0018068629  
C, 0, -6.5734263178, -9.4676464813, -2.2647167901  
H, 0, -6.8409534245, -10.3654100001, -2.8264704038  
H, 0, -5.9433063151, -8.8480831033, -2.9111636538  
C, 0, -7.793121577, -8.7324740427, -1.7329622392  
H, 0, -7.4986300361, -7.8721081667, -1.1243012974  
H, 0, -8.4085745464, -8.3565705121, -2.5592012396  
H, 0, -8.406347218, -9.39430728, -1.1158489092  
C, 0, -1.1496672389, -8.9267222582, -3.1062976093  
H, 0, -1.0923953705, -9.3506488193, -4.1122631368  
H, 0, -1.2933994811, -7.8481192219, -3.2142504347  
C, 0, 0.0873864875, -9.2865704965, -2.2926376029  
H, 0, 0.981224247, -8.8457846259, -2.7453102965  
H, 0, 0.0164424741, -8.9308747971, -1.2615191361  
H, 0, 0.2173590584, -10.370501208, -2.257186346  
C, 0, 1.1751468878, -2.0704691665, -4.7794126209  
H, 0, 1.7043008929, -1.8058112705, -5.6995332469  
H, 0, 0.132066852, -1.7537393628, -4.8826470143  
C, 0, 1.2985275469, -3.5566286842, -4.4813906995  
H, 0, 0.7096710191, -3.8418375678, -3.6071207718  
H, 0, 0.9194469475, -4.1407398113, -5.3268449241  
H, 0, 2.3418516276, -3.8331128596, -4.3076869776

### **C60@2subphthalocyanine-SC4H9**

C, 0, -5.5605888295, -3.1798503519, -1.803260801  
C, 0, -5.5563404472, -2.0984961257, -2.7342707674  
C, 0, -4.9343405327, -2.2331577713, -3.9740852291  
C, 0, -4.3905862768, -3.4702032197, -4.324236623  
C, 0, -4.5092940908, -4.5789146599, -3.4491981609  
C, 0, -5.0523476724, -4.4236932633, -2.1759799152  
C, 0, -6.0774428422, -2.6651868944, -0.542973801  
C, 0, -6.1442426468, -0.9408480794, -2.0667682718  
H, 0, -4.8899342214, -1.384594501, -4.645822713  
H, 0, -5.092333386, -5.2694566972, -1.4986835201  
C, 0, -5.4980142089, -0.7870592985, 3.4983625839  
C, 0, -5.4717308468, -2.1471582748, 3.0700985187  
C, 0, -4.9176620581, -3.1286527753, 3.8919734105  
C, 0, -4.3914621182, -2.7608245673, 5.1347689643  
C, 0, -4.3267982765, -1.3944092262, 5.505289559  
C, 0, -4.8915528628, -0.4116351059, 4.6949311953  
C, 0, -6.0976770884, -0.0011229254, 2.4312431358  
C, 0, -6.0332227702, -2.1859607447, 1.7222483626  
H, 0, -4.9177501651, -4.170557778, 3.5939535641  
H, 0, -4.8602916252, 0.6294296226, 4.9970359064  
C, 0, -5.8209858077, 2.6546569291, -1.2012890094  
C, 0, -5.777200853, 2.9235730584, 0.2010447188  
C, 0, -5.2894855597, 4.1331711818, 0.6768208077  
C, 0, -4.8849903882, 5.1074357617, -0.2349267531  
C, 0, -4.9759773097, 4.8704736094, -1.6253316736  
C, 0, -5.4164267269, 3.6323505015, -2.1083690939  
C, 0, -6.2377326442, 1.2601479296, -1.3545710913  
C, 0, -6.1999181422, 1.7184596023, 0.8972855642  
H, 0, -5.2505670918, 4.3248929011, 1.7436279106  
H, 0, -5.4427392699, 3.4486559102, -3.1763271255  
N, 0, -6.5553089908, 0.845012713, -0.0889196466

N, 0, -6.5237400916, -1.3976838983, -0.8278890825  
N, 0, -6.4968858655, -0.9152871638, 1.4860769606  
N, 0, -6.0755183001, 0.3734997099, -2.3575138108  
N, 0, -5.8874231468, -3.0829301162, 0.7253978453  
N, 0, -6.0176099048, 1.3156505828, 2.1688551693  
B, 0, -7.1620949287, -0.4961030337, 0.1946541583  
C, 0, -10.3564311598, -3.6059605486, 0.4877338867  
C, 0, -11.6233499532, -3.2390993082, 0.0384927117  
C, 0, -11.8552871548, -1.918228915, -0.356366104  
C, 0, -10.8303914863, -0.97831912, -0.3081149479  
C, 0, -9.5617088892, -1.3546807594, 0.1401106133  
C, 0, -9.3220060257, -2.6694069505, 0.5434381477  
H, 0, -10.1651604011, -4.6254875497, 0.8024809478  
H, 0, -12.4218618102, -3.9700300135, -0.0016595708  
H, 0, -12.837712074, -1.6204316244, -0.7045229578  
H, 0, -10.9843288757, 0.0497538597, -0.6106833617  
H, 0, -8.3493730635, -2.9680898931, 0.9118160159  
O, 0, -8.5959767721, -0.3635691459, 0.1673883306  
C, 0, -3.0757069112, -1.4836361505, 0.6740279083  
C, 0, -2.1706249116, -2.5653560123, 1.0382719421  
C, 0, -1.3468110717, -2.4312642924, 2.1464661832  
C, 0, -1.3943122119, -1.2157532898, 2.9490001518  
C, 0, -2.260923962, -0.1883456251, 2.6060010176  
C, 0, -3.1185633344, -0.3254355812, 1.4375875213  
C, 0, -3.1078269325, -1.3951796417, -0.7762317027  
C, 0, -2.2275528745, -2.4211409228, -1.3145399704  
C, 0, -1.6410254741, -3.1379732668, -0.1910447657  
C, 0, -0.3191270082, -3.5575515017, -0.2510270965  
C, 0, 0.0391184792, -2.8761347367, 2.0876584887  
C, 0, -0.0391783331, -0.9113196915, 3.3888232841  
C, 0, 0.3852208469, 0.4115883121, 3.4606306687  
C, 0, -0.5255506495, 1.4920416142, 3.0985214116  
C, 0, -1.8189537228, 1.1981455326, 2.6820206224  
C, 0, -2.404371157, 1.9173217961, 1.5579532224  
C, 0, -3.2027423522, 0.9718171711, 0.7894774653  
C, 0, -3.2331748867, 1.0527224944, -0.5945085991  
C, 0, -3.186827286, -0.1568735039, -1.3954072337  
C, 0, -1.4700093585, -2.1629254581, -2.4499200851  
C, 0, -1.5548760949, -0.8593316533, -3.0997744751  
C, 0, -2.3981240328, 0.1189987017, -2.5873887759  
C, 0, -1.9505510939, 1.5018867371, -2.5137614432  
C, 0, -2.4743069864, 2.0842127455, -1.2862462748  
C, 0, -1.7124776863, 2.9886505463, -0.5577711249  
C, 0, -1.6706401694, 2.8941442208, 0.8981578247  
C, 0, -0.3161242014, 3.2053485445, 1.3326084885  
C, 0, 0.2438080556, 2.5178196457, 2.4054143966  
C, 0, 0.8468271266, -1.9344293271, 2.8500188027  
C, 0, 3.275151879, 1.3122598327, 0.6715830492  
C, 0, 3.3595100265, 0.0719627837, 1.2914427654  
C, 0, 3.4102518677, -1.1420955202, 0.4907428593  
C, 0, 3.3681265933, -1.0567148406, -0.8939949605  
C, 0, 3.2836104838, 0.2414072363, -1.5449831406  
C, 0, 2.32870878, 2.4793489476, -1.1440598473  
C, 0, 1.8064315116, 3.0614516103, 0.0857213248  
C, 0, 2.3910026087, 2.3377948361, 1.2065113205  
C, 0, 1.6265029803, 2.0702457812, 2.3348172535

C,0,1.7157192863,0.7706014788,2.9868736853  
C,0,2.5629838613,-0.2060604494,2.478365517  
C,0,2.6482584846,-2.1747737471,1.1811840031  
C,0,1.8775660197,-3.0718798917,0.4510065835  
C,0,1.8386554717,-2.9865161348,-1.0058383347  
C,0,2.5647451142,-1.9995729784,-1.659977709  
C,0,1.9793264103,-1.2788367012,-2.781582669  
C,0,2.4284093305,0.1049547517,-2.7163496105  
C,0,1.5622882117,1.1342282754,-3.0646634394  
C,0,1.5116625582,2.3506172173,-2.2588897691  
C,0,0.4827246182,3.4830883595,0.1464871163  
C,0,-0.3788314116,3.3492005348,-1.0228880553  
C,0,0.1240597248,2.7936630173,-2.1963718155  
C,0,-0.6806711817,1.8480183305,-2.958268072  
C,0,0.2052690157,0.8262004448,-3.4973729664  
C,0,-0.2223200205,-0.4971615915,-3.5658837645  
C,0,0.685797943,-1.5728996227,-3.1958380476  
C,0,-0.0831348309,-2.604128041,-2.5109316405  
C,0,0.4793736212,-3.2888373948,-1.4384364849  
C,0,2.1192287032,-1.591606635,2.4069086239  
C,0,0.5419406726,-3.4254338291,0.9144998942  
C,0,3.2346934342,1.3980342112,-0.7792769948  
C,0,5.642690901,3.2852352998,-1.4884212225  
C,0,5.5447819897,2.5785704755,-2.7237557181  
C,0,4.8460021954,3.1253108818,-3.7965425228  
C,0,4.2585896961,4.3826621775,-3.6488551114  
C,0,4.345699313,5.0783630149,-2.4192428344  
C,0,5.0294521593,4.5250593412,-1.3355303471  
C,0,6.3131925715,2.4095204648,-0.5391383356  
C,0,6.1633657414,1.2744906303,-2.5293275788  
H,0,4.7863165029,2.5942982693,-4.7401347791  
H,0,5.0676521271,5.0532145095,-0.3899834594  
C,0,6.1400052285,-0.6309590958,2.747458227  
C,0,6.1268900481,0.7944539283,2.7609247502  
C,0,5.6543005296,1.4909690335,3.86981989  
C,0,5.1754139197,0.7794164569,4.9698558399  
C,0,5.1793854945,-0.6394231262,4.9562791825  
C,0,5.6536712431,-1.3408443745,3.8440316898  
C,0,6.5889646389,-1.0506066598,1.4236029288  
C,0,6.5428183479,1.2476802138,1.443626879  
H,0,5.669868492,2.5730715952,3.88356946  
H,0,5.6437536372,-2.4244701091,3.8436475499  
C,0,5.6853096089,-2.377267535,-2.7736721785  
C,0,5.8437042698,-3.1084547077,-1.5573421864  
C,0,5.4042062387,-4.4267763806,-1.4697654902  
C,0,4.7965188142,-5.0144087648,-2.5826804786  
C,0,4.5794430927,-4.2647478003,-3.7650711691  
C,0,5.0326816992,-2.9484593967,-3.8629118838  
C,0,6.1960302928,-1.0321716113,-2.543072384  
C,0,6.4298342077,-2.1981710368,-0.5774313996  
H,0,5.5577149583,-5.0052419103,-0.5665517794  
H,0,4.8795408551,-2.3855650897,-4.7766587301  
N,0,6.7064182901,-1.0546206956,-1.2760256095  
N,0,6.6987833712,1.3083020138,-1.2633110011  
N,0,6.9169753579,0.1134810986,0.7682586393  
N,0,5.9773991465,0.1232416276,-3.1984736508



N,0,6.300679874,2.4094620879,0.8071553044  
N,0,6.4213296136,-2.2154426657,0.7688693443  
B,0,7.4092125465,0.118167233,-0.6586224307  
C,0,10.8551587435,2.5889541587,0.7668505198  
C,0,12.1274658669,2.045599716,0.5999393719  
C,0,12.2692200259,0.8219136318,-0.0609619479  
C,0,11.1514035839,0.1498155441,-0.5442522136  
C,0,9.8784233702,0.6999465606,-0.3709265373  
C,0,9.7261615478,1.9235918577,0.2831471769  
H,0,10.7318101173,3.5390100234,1.2741232807  
H,0,12.9983405314,2.5674940693,0.9776580705  
H,0,13.2535366265,0.3893852002,-0.1986703663  
H,0,11.2335275291,-0.7996159838,-1.058083366  
H,0,8.7480524017,2.3689127596,0.4117317759  
O,0,8.821659732,-0.0283240659,-0.8860354366  
S,0,-4.0341015383,-6.2668549873,-3.9900841458  
S,0,-3.5152265609,-3.7237038605,-5.9097120238  
S,0,-4.6533009216,6.1721682981,-2.8693230405  
S,0,-4.2621387884,6.6940925341,0.4529579723  
S,0,-3.4801293189,-0.8278776625,7.0364749198  
S,0,-4.0000363921,-4.1393831578,6.2817296817  
S,0,4.6201181497,-1.651648687,6.3798811686  
S,0,4.6204007223,1.7436331693,6.4384777427  
S,0,3.5968884172,6.728982788,-2.1640713064  
S,0,3.4558453977,5.1498845169,-5.1092280585  
S,0,3.6891898456,-4.959170353,-5.215007084  
S,0,4.3900679574,-6.7995111255,-2.4963688042  
C,0,2.6658821748,-6.7260860317,-1.7368732273  
H,0,2.1384260648,-5.8747296612,-2.1803778596  
H,0,2.1791180709,-7.6460882923,-2.0732182588  
C,0,2.6905835575,-6.6394169919,-0.2183651459  
H,0,3.1312929642,-5.680825736,0.0901527385  
H,0,3.3365858986,-7.429665496,0.1831523253  
C,0,1.9217300924,-4.4861076384,-4.6970731675  
H,0,1.4081590152,-5.4062314403,-4.4079118614  
H,0,2.0419580436,-3.8528955317,-3.8139663266  
C,0,1.1616171401,-3.7423764062,-5.7918114556  
H,0,0.183683358,-3.4569940912,-5.3694526159  
H,0,0.9456366215,-4.4179089089,-6.6293560231  
C,0,2.7527600845,-1.4409495365,6.1810258299  
H,0,2.4880110409,-0.4589511822,6.5751355932  
C,0,2.8026234818,2.0758470646,5.9896904465  
H,0,2.2339846757,1.8282704913,6.8907311787  
H,0,2.5571602803,1.3477598067,5.2142994249  
C,0,2.4886350568,3.4946482752,5.5241943285  
H,0,1.4405635391,3.4844754782,5.181426378  
H,0,2.5294614144,4.1901874924,6.3714189681  
C,0,1.7674943835,6.2672189914,-2.2850116846  
H,0,1.551295374,6.1405629329,-3.3475376365  
H,0,1.6392302402,5.3086246585,-1.7720080796  
C,0,0.8954215246,7.3556669007,-1.6539986651  
H,0,-0.0630394062,7.3672637978,-2.1868865321  
H,0,1.351363657,8.3408035674,-1.8206915866  
C,0,2.066618746,3.9232183383,-5.4695114162  
H,0,1.2943513401,4.0341752506,-4.6993103297  
H,0,2.4772419517,2.911596916,-5.4207901695

C, 0, 1.5229500529, 4.2528958317, -6.8580172052  
H, 0, 2.3207713127, 4.1050262103, -7.5964795964  
C, 0, -2.8328947394, 6.6237126746, -2.5828727057  
H, 0, -2.831231475, 7.5492747885, -2.0079008945  
H, 0, -2.3936655196, 5.8309364219, -1.964958226  
C, 0, -2.1054296136, 6.7600433602, -3.9261768645  
H, 0, -1.3734554514, 7.5732021879, -3.8523207874  
H, 0, -2.8156595901, 7.0619229342, -4.7067125297  
C, 0, -2.177687028, -6.2429304307, -3.6154717834  
H, 0, -1.8383865079, -7.2323590575, -3.9349376934  
H, 0, -1.7322130488, -5.4849213558, -4.2645427289  
C, 0, -1.8832453943, -5.9800210091, -2.1457880913  
H, 0, -0.7986940796, -5.833480882, -2.0290269527  
H, 0, -2.3533795924, -5.0296240123, -1.8666978476  
C, 0, -2.88911563, -1.9890875286, -6.2740413605  
H, 0, -1.919746507, -2.1543868466, -6.7536546088  
H, 0, -2.7071144658, -1.5030759945, -5.3122489349  
C, 0, -3.7905701336, -1.1590323685, -7.1800803115  
H, 0, -3.9986056249, -1.7245901029, -8.094988584  
H, 0, -4.7609370026, -0.9816510308, -6.6997030555  
C, 0, -2.1293027454, -4.0320639058, 6.5120248001  
H, 0, -1.8962513265, -4.942576561, 7.0727581599  
H, 0, -1.9439283879, -3.1725769278, 7.1589940731  
C, 0, -1.3266000099, -3.9574468363, 5.2163734632  
H, 0, -1.8302006906, -3.2731756627, 4.5210837121  
H, 0, -0.359113131, -3.4934979675, 5.4574561186  
C, 0, -1.80336422, -0.470925569, 6.2298416626  
H, 0, -1.4195299261, -1.4187754524, 5.8462132321  
H, 0, -1.988492813, 0.194984641, 5.3829814062  
C, 0, -0.8300182532, 0.1515892814, 7.2227453705  
H, 0, 0.1416430727, 0.2224062196, 6.7078456854  
H, 0, -0.6882225948, -0.5227005136, 8.0769024226  
C, 0, -2.7564227845, 5.9763928205, 1.3381011489  
H, 0, -2.0180753273, 5.7123229374, 0.5736846875  
H, 0, -3.0862684038, 5.0601648083, 1.8311385454  
C, 0, -2.1688347146, 6.9569721775, 2.3431000731  
H, 0, -1.8494857363, 7.8691994043, 1.8261558605  
H, 0, -2.9377986456, 7.2505938637, 3.0685083594  
C, 0, 1.8737313679, -2.4902055711, -6.3185338779  
H, 0, 2.2996132131, -1.9298553028, -5.4752119138  
H, 0, 2.7207552026, -2.7946007957, -6.9417807531  
C, 0, 0.9296097389, -1.585143076, -7.1133254205  
H, 0, 1.4705728253, -0.7641928957, -7.590732936  
H, 0, 0.4152464516, -2.1503454848, -7.8997065939  
H, 0, 0.1668999967, -1.1458660189, -6.456547044  
C, 0, 1.2826633093, -6.7720388718, 0.3709560978  
H, 0, 0.8489794184, -7.7336969511, 0.0638500788  
H, 0, 0.6387383216, -5.9953689088, -0.0628961496  
C, 0, 1.2742864528, -6.6650887729, 1.8963993625  
H, 0, 0.2589699533, -6.7550216091, 2.2953480893  
H, 0, 1.8846916085, -7.4562549832, 2.3446901383  
H, 0, 1.6837179736, -5.7015477327, 2.2228487015  
C, 0, 1.9967110839, -2.5403090231, 6.922699575  
H, 0, 2.1268729871, -2.4109673227, 8.0036618022  
H, 0, 0.9278062855, -2.3754169215, 6.7176314317  
C, 0, 2.3849822318, -3.9758519433, 6.5308675647

H, 0, 3.3583804802, -4.2172206411, 6.9728344695  
H, 0, 1.6585432767, -4.6632285678, 6.9829539228  
C, 0, -1.0556996442, -5.2904288877, 4.5074141619  
H, 0, -0.6598112207, -6.0123833262, 5.2353888755  
H, 0, -0.2529772552, -5.1236055298, 3.7775493887  
C, 0, -2.2626230118, -5.8838299471, 3.7747717291  
H, 0, -3.0733460311, -6.1364043929, 4.4620243342  
H, 0, -2.6517979368, -5.1644625327, 3.0424039909  
H, 0, -1.9792609907, -6.7917491062, 3.2327251808  
C, 0, 3.3726071124, 4.0217503071, 4.3899442255  
H, 0, 4.3516384003, 4.2991842484, 4.797799632  
H, 0, 3.553311279, 3.2198303545, 3.6649709159  
C, 0, 2.7377237793, 5.2136355869, 3.6710825454  
H, 0, 3.4132614853, 5.6344313103, 2.9209907309  
H, 0, 1.8153064363, 4.9088663214, 3.1579474285  
H, 0, 2.4766859946, 6.0103981483, 4.3776197066  
C, 0, 0.6093850623, 7.156715691, -0.1600021398  
H, 0, 0.0513977471, 6.2162726774, -0.0370635891  
H, 0, -0.0612364306, 7.9599464708, 0.1717660115  
C, 0, 1.8539599888, 7.124223447, 0.7312994841  
H, 0, 1.5757618116, 7.1320094519, 1.7896339927  
H, 0, 2.4509486101, 6.2248690297, 0.5451794918  
H, 0, 2.497744607, 7.9887847393, 0.5401810166  
C, 0, -3.1388497351, 0.1873523032, -7.5331122956  
H, 0, -2.2221915322, 0.0016309735, -8.1101594905  
H, 0, -3.8156797778, 0.7397807196, -8.1943166034  
C, 0, -2.8063908581, 1.0497511656, -6.3078938892  
H, 0, -2.5229127334, 2.0617122377, -6.6129675539  
H, 0, -3.6685506395, 1.1312505674, -5.6332275976  
H, 0, -1.9675683691, 0.6351113092, -5.733424162  
C, 0, -2.3605316381, -7.0768365234, -1.1864005402  
H, 0, -3.3548494881, -7.4185815298, -1.4987872648  
H, 0, -1.693429387, -7.9452412801, -1.2636375313  
C, 0, -2.4290525229, -6.5895602786, 0.2646406378  
H, 0, -1.4598551535, -6.2104043806, 0.610730704  
H, 0, -3.1527197839, -5.7703524409, 0.3652181957  
H, 0, -2.7366021928, -7.3935172286, 0.9395070768  
C, 0, -1.2340283123, 1.5502020349, 7.7101080495  
H, 0, -0.4583238917, 1.916188449, 8.3930221378  
H, 0, -2.160001877, 1.4850785047, 8.2934153884  
C, 0, -1.4176301329, 2.5448818277, 6.5593565945  
H, 0, -2.305451125, 2.3119246371, 5.9610166494  
H, 0, -1.5318838983, 3.5662345509, 6.9332304873  
H, 0, -0.549689684, 2.5250022796, 5.8867116114  
C, 0, -0.9716731906, 6.3273713045, 3.0791145189  
H, 0, -0.4342877439, 7.1126424615, 3.6244073162  
H, 0, -0.2666983109, 5.9283322381, 2.3360284401  
C, 0, -1.3669369875, 5.2154344097, 4.0571196106  
H, 0, -0.4829665672, 4.8124401229, 4.5634335149  
H, 0, -2.0511902412, 5.5952585637, 4.8234594564  
H, 0, -1.8616199068, 4.378396117, 3.5499330824  
C, 0, -1.3876496375, 5.472013304, -4.3486917657  
H, 0, -0.6349518723, 5.2248230388, -3.583756749  
H, 0, -0.837436343, 5.6564350282, -5.2815055916  
C, 0, -2.3312839159, 4.2808761984, -4.5305071626  
H, 0, -3.1100640324, 4.504681381, -5.2678984129

H, 0, -1.7845707145, 3.3931881709, -4.8605207749  
H, 0, -2.8328912879, 4.0233109747, -3.590164008  
H, 0, 2.5438074404, -1.4724528916, 5.1077608187  
C, 0, 2.4533712773, -4.217424346, 5.0204356633  
H, 0, 2.6325918331, -5.2751951917, 4.8049082093  
H, 0, 1.520625602, -3.9282169671, 4.5235734721  
H, 0, 3.2664363924, -3.640026021, 4.5652380623  
H, 0, 1.2503527269, 5.3151679775, -6.8946200941  
C, 0, 0.3047507733, 3.4015971632, -7.2438753272  
H, 0, -0.5235068899, 3.6178319888, -6.5576368987  
H, 0, -0.0290980511, 3.7118008202, -8.2408084292  
C, 0, 0.5959205768, 1.8987517419, -7.2466524879  
H, 0, -0.2400650348, 1.3325519794, -7.6689472343  
H, 0, 1.4875072103, 1.6803655774, -7.8458454944  
H, 0, 0.7687219167, 1.5167631653, -6.2335687055

### **C60@subphthalocyanine-dithiino:**

C, 0, -1.1541653907, 2.8969611961, 0.8322858675  
C, 0, 0.2191305776, 3.1318179926, 1.1320316088  
C, 0, 0.8931628505, 4.2156662213, 0.5739618911  
C, 0, 0.177962624, 5.0791454546, -0.2488509251  
C, 0, -1.184616907, 4.8561642635, -0.5328940946  
C, 0, -1.8556101453, 3.7547707935, -0.0134352373  
C, 0, -1.4963257136, 1.5939147697, 1.3778296097  
C, 0, 0.7069306908, 1.9790875267, 1.8713090403  
H, 0, 1.952874633, 4.360887165, 0.7481320847  
H, 0, -2.8849908199, 3.5519665897, -0.2840743871  
C, 0, -1.9118146673, -2.7930860767, 0.6723319855  
C, 0, -2.809849117, -1.7035474272, 0.4815562532  
C, 0, -3.8548544659, -1.7908462837, -0.4360037598  
C, 0, -4.0031724778, -2.9745874394, -1.1486787626  
C, 0, -3.0901146212, -4.0373348721, -0.9919401301  
C, 0, -2.037061216, -3.9554022017, -0.0872021331  
C, 0, -0.842618813, -2.3275700604, 1.5421701458  
C, 0, -2.2754285528, -0.5695828527, 1.2150800225  
H, 0, -4.5133502863, -0.9487389075, -0.6123186669  
H, 0, -1.3090742113, -4.7540098189, -0.0046573999  
C, 0, 3.2842878136, -0.6310159983, 1.8544651235  
C, 0, 2.8028409526, -1.970228469, 1.7552053221  
C, 0, 3.6132006121, -2.9801136329, 1.2446376332  
C, 0, 4.9110138082, -2.6518948146, 0.8639107033  
C, 0, 5.387192618, -1.3302802061, 0.9642092665  
C, 0, 4.5752403698, -0.3078062091, 1.4454854715  
C, 0, 2.148159347, 0.2123625529, 2.1965707779  
C, 0, 1.3746638025, -1.9382017484, 2.0361816364  
H, 0, 3.2308286398, -3.9846359677, 1.1072150245  
H, 0, 4.9234182241, 0.7182451927, 1.4615983409  
N, 0, 1.0979903889, -0.6440647347, 2.3861765  
N, 0, -0.3910252226, 1.1771959226, 2.0799344163  
N, 0, -1.1927157536, -1.049227098, 1.9118334902  
N, 0, 1.9655636676, 1.5301934383, 2.0073104725  
N, 0, -2.4714838319, 0.744881404, 1.0087691106  
N, 0, 0.4076710295, -2.8000541158, 1.679458402

B, 0, -0.2844593954, -0.1772819527, 2.7551515347  
C, 0, -3.8018821979, 0.7144919317, 5.3532555993  
C, 0, -3.6775237221, 0.4295865705, 6.7115717395  
C, 0, -2.4666302019, -0.0710783417, 7.1985361844  
C, 0, -1.3962069292, -0.2868768508, 6.3365231034  
C, 0, -1.5290378773, -0.0007946616, 4.9746702124  
C, 0, -2.7328437778, 0.5033551719, 4.4794615344  
H, 0, -4.7346966669, 1.1052146604, 4.9626630064  
H, 0, -4.5112252588, 0.5945748194, 7.3833101644  
H, 0, -2.3569979562, -0.2955971043, 8.2533461381  
H, 0, -0.4487461984, -0.6758292507, 6.687653058  
H, 0, -2.8490459963, 0.7370340556, 3.4296326287  
O, 0, -0.4201829097, -0.2442165628, 4.186471466  
S, 0, -3.2540016854, -5.5542430255, -1.9999718558  
S, 0, -5.4149384034, -3.1263358883, -2.3011596743  
S, 0, -2.1082120186, 6.0129998699, -1.6074302421  
S, 0, 1.0539832464, 6.5096733199, -0.974875519  
S, 0, 7.0906273613, -0.9126053333, 0.4476859713  
S, 0, 5.9847610237, -3.9789103267, 0.2105550211  
C, 0, -0.8976661742, 6.1807117811, -2.9703239957  
C, 0, 0.4543638154, 6.3801151189, -2.6990248629  
C, 0, 1.3694610945, 6.4992808927, -3.747076023  
C, 0, 0.9217000654, 6.4569299472, -5.0665493219  
C, 0, -0.4359267068, 6.2704325032, -5.3380835147  
C, 0, -1.3440167162, 6.1148063873, -4.291063646  
H, 0, 2.4231616974, 6.6190931555, -3.5234471847  
H, 0, 1.6326349992, 6.5520303542, -5.8786957611  
H, 0, -0.7849577904, 6.2214273238, -6.362833737  
H, 0, -2.3937620867, 5.9349800209, -4.4919306299  
C, 0, -4.137627654, -3.7198194563, -6.1457157697  
C, 0, -3.1886289792, -4.7361826643, -6.0111733717  
C, 0, -2.9053504951, -5.2655729156, -4.753015943  
C, 0, -3.5918129357, -4.7949341476, -3.6309772263  
C, 0, -4.5257420363, -3.7704473554, -3.764198372  
C, 0, -4.793200208, -3.2231517865, -5.0201577477  
H, 0, -4.348299087, -3.2977550975, -7.1212325104  
H, 0, -2.6559253891, -5.1033726876, -6.8804255065  
H, 0, -2.1516964165, -6.0354271833, -4.6340646684  
H, 0, -5.5052937056, -2.410670748, -5.1069605693  
C, 0, 6.7524960019, -3.79504529, -2.4649709141  
C, 0, 7.3311622806, -3.1743081828, -3.5726455651  
C, 0, 7.808528194, -1.8669422283, -3.4704703751  
C, 0, 7.7058552853, -1.178261438, -2.2611535903  
C, 0, 7.1543478763, -1.810561729, -1.1458737397  
C, 0, 6.6797491887, -3.1168738199, -1.2473874603  
H, 0, 6.3535667114, -4.8001952253, -2.5405062014  
H, 0, 7.3897993489, -3.704659047, -4.5157206378  
H, 0, 8.2418029722, -1.3744009428, -4.3328147631  
H, 0, 8.0453611754, -0.1520877717, -2.1787854382  
C, 0, 2.5560474642, -1.5550380876, -1.450036787  
C, 0, 1.1183376243, -1.5086653129, -1.2202367637  
C, 0, 0.2777151606, -2.3542541885, -1.9323719074  
C, 0, 0.8314204705, -3.2938642145, -2.8976992526  
C, 0, 2.2033888162, -3.3393690787, -3.1116824893  
C, 0, 3.0874405653, -2.4503494336, -2.3695581495  
C, 0, 3.0689144055, -0.1942923587, -1.3766632668

C, 0, 1.9491354757, 0.6952503926, -1.1015498244  
C, 0, 0.740239862, -0.1165895928, -0.9975207954  
C, 0, -0.4597995657, 0.3622817628, -1.5148629355  
C, 0, -0.9795905484, -1.8508006656, -2.4661635912  
C, 0, -0.0849704701, -3.3716423998, -4.0275238413  
C, 0, 0.4122851025, -3.492443038, -5.3191858468  
C, 0, 1.8514925922, -3.5375791477, -5.5436804755  
C, 0, 2.7256539297, -3.4643784571, -4.4660212003  
C, 0, 3.9309303838, -2.6514045799, -4.5596093999  
C, 0, 4.153438386, -2.0244164603, -3.2634139686  
C, 0, 4.6412610421, -0.7260460245, -3.1944719787  
C, 0, 4.0902944461, 0.2103113879, -2.2269345061  
C, 0, 1.8976067267, 1.9463308745, -1.7021181926  
C, 0, 2.9657015104, 2.3732522608, -2.5959937024  
C, 0, 4.0362965277, 1.5254663076, -2.8524378381  
C, 0, 4.5578613521, 1.4014698596, -4.2071558425  
C, 0, 4.932352239, 0.0094266803, -4.4178250882  
C, 0, 4.723035901, -0.5885795943, -5.6537753708  
C, 0, 4.2101867264, -1.9516715325, -5.7265019076  
C, 0, 3.2921014521, -2.0270840946, -6.8552731107  
C, 0, 2.1416152934, -2.8015525993, -6.7665138054  
C, 0, -1.2073586778, -2.4815192384, -3.7585198828  
C, 0, -0.2907442199, -0.155890522, -7.6259012399  
C, 0, -1.3090718241, -0.5608524615, -6.7719193848  
C, 0, -1.8646125235, 0.3757647623, -5.8038143182  
C, 0, -1.3762992331, 1.6744601466, -5.7348542995  
C, 0, -0.3076261071, 2.0988779609, -6.6300787732  
C, 0, 1.659994441, 1.1583880585, -7.7785493133  
C, 0, 2.036424083, -0.2332698383, -7.9876872225  
C, 0, 0.8305429918, -1.0448123577, -7.8947043958  
C, 0, 0.8816791997, -2.2984083054, -7.2977708306  
C, 0, -0.1865739706, -2.7250060415, -6.4042115601  
C, 0, -1.2547430947, -1.8751169963, -6.1463665949  
C, 0, -2.1557594665, -0.3603472261, -4.5807901894  
C, 0, -1.9441621487, 0.2383244701, -3.344576726  
C, 0, -1.431685057, 1.6010238726, -3.271662156  
C, 0, -1.1537550754, 2.3021832904, -4.438916274  
C, 0, 0.0537017539, 3.1106357942, -4.5331564762  
C, 0, 0.5760948812, 2.9869473073, -5.887508306  
C, 0, 1.9477099709, 2.9438839781, -6.102881846  
C, 0, 2.5023500159, 2.005844181, -7.0694048169  
C, 0, 3.2375585333, -0.7124856726, -7.4805885911  
C, 0, 4.1209910667, 0.176128614, -6.7378299994  
C, 0, 3.7625849364, 1.5035851735, -6.5378246404  
C, 0, 3.9860720615, 2.1316465304, -5.2421673889  
C, 0, 2.8649602742, 3.0223411905, -4.9727832222  
C, 0, 2.3661016024, 3.1378214756, -3.681540419  
C, 0, 0.9268188603, 3.1848110456, -3.4564195407  
C, 0, 0.6381918546, 2.4467544553, -2.2358964678  
C, 0, -0.5133618753, 1.6759135856, -2.1432964095  
C, 0, -1.7777813194, -1.7510667065, -4.7923843326  
C, 0, -1.3413395565, -0.5260292052, -2.2610877301  
C, 0, 0.2216413529, 1.2063016168, -7.554144442

**C60@2subphthalocyanine-dithiino**

C,0,5.2831442979,1.6398383754,-9.4008435172  
C,0,4.3690365645,2.7237572139,-9.5418959043  
C,0,4.5139172637,3.8771101579,-8.7736761994  
C,0,5.5926054103,3.9528338121,-7.8981982259  
C,0,6.5049670797,2.8864594904,-7.7713966598  
C,0,6.3466920214,1.7155799678,-8.5040014767  
C,0,4.7441624339,0.5206312692,-10.1548084799  
C,0,3.2817976961,2.2671303482,-10.3940338882  
H,0,3.7853014907,4.6771831456,-8.8308032318  
H,0,7.0117119192,0.87285596,-8.3570517228  
C,0,2.2964062482,-3.2085933641,-10.0936709028  
C,0,3.6756926417,-2.9643927253,-9.8346041602  
C,0,4.4169755734,-3.8287927919,-9.0316668892  
C,0,3.775076552,-4.9395878389,-8.4985593692  
C,0,2.3976492077,-5.1545344115,-8.710040667  
C,0,1.6480494408,-4.2939753677,-9.505147425  
C,0,1.7748641336,-2.0479636518,-10.7995615951  
C,0,3.9873051813,-1.6464064885,-10.3584905161  
H,0,5.4563685916,-3.6240349341,-8.8046789905  
H,0,0.5809707467,-4.43653767,-9.6290545265  
C,0,-0.3642330763,1.8701533801,-10.527710269  
C,0,-0.8346965558,0.5303256569,-10.6634765739  
C,0,-2.1144005229,0.1820369609,-10.2402625255  
C,0,-2.9244568486,1.1787558216,-9.7049409527  
C,0,-2.4571869373,2.4995751879,-9.5631555188  
C,0,-1.1716470589,2.8531806252,-9.962346612  
C,0,1.0578387114,1.8633383989,-10.8400379527  
C,0,0.3043273727,-0.2903302152,-11.0511759779  
H,0,-2.4548225535,-0.8455938964,-10.2858914144  
H,0,-0.7940849286,3.8554192247,-9.797336976  
N,0,1.3406041561,0.5851371888,-11.236441055  
N,0,3.6379276598,1.0050312576,-10.8098487481  
N,0,2.8578261045,-1.2273102401,-11.0184196533  
N,0,2.0228633618,2.7273320096,-10.4823957598  
N,0,4.9617063256,-0.7958703244,-9.991487906  
N,0,0.5084420062,-1.6094688109,-10.8966275554  
B,0,2.7173760197,0.1417385679,-11.6529447254  
C,0,6.0364180379,-1.0125927476,-14.4061100705  
C,0,5.7709924224,-0.9662226849,-15.7731531567  
C,0,4.5227957899,-0.5169186196,-16.2142163553  
C,0,3.5525626897,-0.1226697288,-15.2984483072  
C,0,3.8253492755,-0.1739046567,-13.9286360777  
C,0,5.0702943491,-0.6169340551,-13.4782698373  
H,0,7.0012886505,-1.3562495917,-14.0507996777  
H,0,6.5254549793,-1.2735312886,-16.4872099039  
H,0,4.3048159577,-0.4751529621,-17.2752334846  
H,0,2.5778231669,0.2275959517,-15.6138263408  
H,0,5.3000178323,-0.6520913689,-12.4215202458  
O,0,2.8100428111,0.2372111954,-13.0852877749  
S,0,1.5501599183,-6.5682467794,-7.9174607662  
S,0,4.7602533287,-6.1250057792,-7.515775072  
S,0,7.9214221505,3.0072366575,-6.6217219318  
S,0,5.7873123329,5.4682586385,-6.8932681638  
S,0,-3.5235310176,3.7909779221,-8.8273953183  
S,0,-4.6143214758,0.7280756628,-9.1723021935  
C,0,7.0551655082,3.663602587,-5.1486900911

C, 0, 6.1438712686, 4.7102950281, -5.2657900568  
C, 0, 5.5026517224, 5.2095965896, -4.1299434521  
C, 0, 5.7996084034, 4.6811101014, -2.8745929507  
C, 0, 6.7186105453, 3.6353394377, -2.7571523092  
C, 0, 7.3344606972, 3.1159724688, -3.8955142576  
H, 0, 4.7734229196, 6.0042024603, -4.2381922746  
H, 0, 5.3012886426, 5.071780442, -1.9951149751  
H, 0, 6.9382983382, 3.2093043605, -1.7850088972  
H, 0, 8.0291640785, 2.2873214673, -3.8205478637  
C, 0, 3.3705128449, -6.3776950093, -3.6735237583  
C, 0, 1.9923175053, -6.5324385365, -3.8444746089  
C, 0, 1.446030593, -6.5616076382, -5.1267459979  
C, 0, 2.2815117884, -6.4592941083, -6.241724656  
C, 0, 3.6526498988, -6.289251788, -6.069736884  
C, 0, 4.1985658146, -6.2398683738, -4.7861022187  
H, 0, 3.7939805617, -6.3396271626, -2.6760917244  
H, 0, 1.3409758633, -6.610228395, -2.9820088262  
H, 0, 0.3755729611, -6.6543161579, -5.2690198818  
H, 0, 5.2664223962, -6.0930842397, -4.6701358905  
C, 0, -5.1569934597, 0.8684742395, -6.4405907226  
C, 0, -5.2319227476, 1.4964660277, -5.1970223637  
C, 0, -4.7696336362, 2.8052526006, -5.0497103456  
C, 0, -4.2318500968, 3.4832206114, -6.1445767828  
C, 0, -4.1823957937, 2.862839265, -7.3936568269  
C, 0, -4.6454335473, 1.5570677232, -7.5409492919  
H, 0, -5.4906512427, -0.1553418042, -6.5654037782  
H, 0, -5.628890752, 0.9574258043, -4.3443865273  
H, 0, -4.8028760238, 3.2907903206, -4.0814430428  
H, 0, -3.8394860008, 4.4877761224, -6.0333676297  
C, 0, 2.4485240707, -1.5157769594, -1.4094939559  
C, 0, 1.0093028157, -1.56909434, -1.1967433828  
C, 0, 0.2258721904, -2.4013291567, -1.9861547547  
C, 0, 0.8424390886, -3.2304350567, -3.0131409551  
C, 0, 2.2167646398, -3.1792407336, -3.2107989281  
C, 0, 3.0399297741, -2.3041705409, -2.3883538037  
C, 0, 2.8834476698, -0.1388161402, -1.224099576  
C, 0, 1.7132260758, 0.6620287608, -0.8959168613  
C, 0, 0.5510424633, -0.221385835, -0.872510618  
C, 0, -0.6682389434, 0.2306218064, -1.3690375743  
C, 0, -1.0523422525, -1.9268618732, -2.4964044156  
C, 0, -0.0577952204, -3.2704233412, -4.1593448136  
C, 0, 0.458866727, -3.2599512868, -5.4493076  
C, 0, 1.9011776645, -3.2062015598, -5.6547469268  
C, 0, 2.7586093715, -3.1677154852, -4.5627521155  
C, 0, 3.9168319278, -2.2857866716, -4.5757548809  
C, 0, 4.0879703738, -1.7502325263, -3.231824557  
C, 0, 4.5039100636, -0.4376214231, -3.0539833958  
C, 0, 3.8888611632, 0.3879525383, -2.0250625841  
C, 0, 1.5973821145, 1.9518186735, -1.3987674503  
C, 0, 2.6502460232, 2.5094858804, -2.2372278467  
C, 0, 3.7671298108, 1.7428307873, -2.5459811043  
C, 0, 4.3080075292, 1.752953467, -3.8983599208  
C, 0, 4.7675748912, 0.4069297468, -4.2115433745  
C, 0, 4.6070756621, -0.102768647, -5.4941853746  
C, 0, 4.1716044437, -1.4825760111, -5.6809043924  
C, 0, 3.2684076783, -1.5177084989, -6.823196619



C, 0, 2.1610913874, -2.3566646132, -6.8071468948  
C, 0, -1.2290797542, -2.4641538498, -3.8368333849  
C, 0, -0.4038602338, 0.2053534354, -7.4915950937  
C, 0, -1.4088624845, -0.3216051987, -6.690964319  
C, 0, -2.0241594469, 0.5039246584, -5.6624341329  
C, 0, -1.609752614, 1.8172153029, -5.485326975  
C, 0, -0.561827706, 2.3719114808, -6.3293237487  
C, 0, 1.4692002224, 1.6361270296, -7.5204126963  
C, 0, 1.9275875918, 0.2879471948, -7.8434981787  
C, 0, 0.7661110548, -0.5956537134, -7.8199640794  
C, 0, 0.8819001249, -1.8861955883, -7.3183911483  
C, 0, -0.1710077226, -2.4440647377, -6.4798648881  
C, 0, -1.2871639995, -1.6765681791, -6.1704350643  
C, 0, -2.2871695507, -0.3401682607, -4.505040784  
C, 0, -2.1279772857, 0.1694661536, -3.2223723313  
C, 0, -1.6925005251, 1.5493603495, -3.0357441436  
C, 0, -1.438550276, 2.3531662566, -4.1409369038  
C, 0, -0.2795081314, 3.2343248604, -4.1538865536  
C, 0, 0.2617053437, 3.2469871968, -5.5064746047  
C, 0, 1.6363174397, 3.2966321502, -5.7037107511  
C, 0, 2.25287113, 2.4679314367, -6.7308091047  
C, 0, 3.1468551275, -0.1638942973, -7.3469860446  
C, 0, 3.9705228959, 0.7104779637, -6.5217716134  
C, 0, 3.5317526554, 1.9936557651, -6.2205927066  
C, 0, 3.7082935561, 2.5304390874, -4.8800553967  
C, 0, 2.5366650979, 3.3353653275, -4.5574673267  
C, 0, 2.0201316677, 3.3244211245, -3.2679911389  
C, 0, 0.5780780917, 3.2720795002, -3.0619301502  
C, 0, 0.3178920978, 2.423239421, -1.9091724468  
C, 0, -0.7897201787, 1.584630529, -1.8930351416  
C, 0, -1.8276071581, -1.6859298526, -4.818214992  
C, 0, -1.4910850018, -0.6436852539, -2.1949348774  
C, 0, 0.0298497825, 1.5830700573, -7.3081572196  
C, 0, -1.1440072763, 2.9162389087, 1.1854829314  
C, 0, 0.2407700675, 3.116684368, 1.4540658215  
C, 0, 0.9151836642, 4.2075490795, 0.9069843446  
C, 0, 0.1872350896, 5.1148311605, 0.1439971167  
C, 0, -1.1943966436, 4.9404185615, -0.0775711786  
C, 0, -1.8633976767, 3.8269157375, 0.4149523224  
C, 0, -1.4906501603, 1.5906989621, 1.6663828251  
C, 0, 0.7305046794, 1.9207608937, 2.1235301173  
H, 0, 1.9847456328, 4.3213555448, 1.0391152866  
H, 0, -2.9069472839, 3.6547690917, 0.1801834314  
C, 0, -1.9798238542, -2.7439729471, 0.72576602  
C, 0, -2.8627834614, -1.6321550669, 0.6082923872  
C, 0, -3.9196384793, -1.6528413123, -0.2992982794  
C, 0, -4.1026911043, -2.7971768762, -1.066963581  
C, 0, -3.2183759117, -3.8896608056, -0.9673338695  
C, 0, -2.1469919081, -3.8691192068, -0.0796401615  
C, 0, -0.8883188084, -2.3409920636, 1.5998322064  
C, 0, -2.3007824505, -0.549249051, 1.3971609666  
H, 0, -4.5610691385, -0.7888989968, -0.426705423  
H, 0, -1.4390828873, -4.6886835801, -0.042422267  
C, 0, 3.2684058238, -0.7262564617, 1.9247779254  
C, 0, 2.7643066126, -2.0512153761, 1.7676607939  
C, 0, 3.5471294813, -3.0458329323, 1.1886143529

C,0,4.8404394322,-2.7182530844,0.7935367479  
C,0,5.3398039837,-1.4108254839,0.9500244374  
C,0,4.5554144399,-0.4030069425,1.5029292716  
C,0,2.1513843338,0.116342401,2.3293680419  
C,0,1.3418702724,-2.0123198498,2.0752748712  
H,0,3.1448500558,-4.0358793407,1.009297035  
H,0,4.9212520721,0.6150662375,1.56399112  
N,0,1.0920524796,-0.7348886711,2.4963598326  
N,0,-0.3742472957,1.1230153201,2.3154020474  
N,0,-1.2126940562,-1.0806980531,2.045671214  
N,0,1.984161664,1.4442836036,2.2084108069  
N,0,-2.4841852817,0.7764326742,1.2704902944  
N,0,0.3559528574,-2.8395217139,1.6893638049  
B,0,-0.2744174299,-0.2639825874,2.9159831883  
C,0,-3.5678265998,0.9370193964,5.6803344255  
C,0,-3.2999657036,0.878247075,7.0464388645  
C,0,-2.0629792818,0.3942151389,7.4822503155  
C,0,-1.1057457176,-0.021411258,6.5622893115  
C,0,-1.3806629643,0.0429228216,5.1934843692  
C,0,-2.6148889969,0.5197913394,4.7483693318  
H,0,-4.5243817271,1.3070434774,5.3291095654  
H,0,-4.043976493,1.2025104457,7.7639608799  
H,0,-1.8434575142,0.342259402,8.5425102443  
H,0,-0.1397340441,-0.3984265416,6.8736024118  
H,0,-2.8465461631,0.5634777631,3.6923367158  
O,0,-0.3789734004,-0.3910651431,4.3451625575  
S,0,-3.4413926539,-5.3674939801,-2.0213316519  
S,0,-5.5173567662,-2.8495075944,-2.2229961696  
S,0,-2.1471728533,6.1791663084,-1.0263732018  
S,0,1.0687173868,6.5366199254,-0.5959690278  
S,0,7.0381498466,-0.9927677089,0.4164671357  
S,0,5.8747051941,-4.0255407708,0.041565256  
C,0,-1.0289514692,6.3588101388,-2.462644446  
C,0,0.3443830494,6.4963138992,-2.2778133691  
C,0,1.1886813753,6.6159870297,-3.383786142  
C,0,0.6513698804,6.6324430178,-4.6701486339  
C,0,-0.7280946961,6.5071922352,-4.8531993141  
C,0,-1.5671366039,6.3556589349,-3.7502981418  
H,0,2.2593141843,6.6849336935,-3.2299667731  
H,0,1.3098803363,6.7221912857,-5.5261111125  
H,0,-1.1458800618,6.5037169682,-5.8533222798  
H,0,-2.6358909196,6.229454815,-3.8793116166  
C,0,-4.3202002343,-3.3836279111,-6.1012536291  
C,0,-3.426943474,-4.4545732505,-6.0151720589  
C,0,-3.1438269962,-5.0297194791,-4.7770913475  
C,0,-3.7760631959,-4.5523157358,-3.6263469892  
C,0,-4.6621044425,-3.4816249088,-3.7120783503  
C,0,-4.9249779978,-2.88715031,-4.9473861156  
H,0,-4.5265041672,-2.9217858072,-7.0602766609  
H,0,-2.9364367031,-4.8287367812,-6.9059791049  
H,0,-2.4317284544,-5.8427912453,-4.6951252042  
H,0,-5.6027530372,-2.0424888326,-4.9938082342  
C,0,6.5794181558,-3.7056093466,-2.6385701252  
C,0,7.1332923409,-3.0325003367,-3.7280249009  
C,0,7.6308112711,-1.7380508247,-3.5683134778  
C,0,7.575287466,-1.1196235992,-2.3188829176

C, 0, 7.0478645086, -1.8050850259, -1.2236980798  
C, 0, 6.5505867738, -3.0966863043, -1.3833752193  
H, 0, 6.1605960431, -4.6984650876, -2.7566056986  
H, 0, 7.1506934686, -3.5088906299, -4.7015190408  
H, 0, 8.0416457498, -1.2017144916, -4.4157833415  
H, 0, 7.9329934926, -0.1046244875, -2.1883155857

### **C70@subphthalocyanine-dithiino-1**

C, 0, -1.3058347297, 3.0488032146, 0.9632786824  
C, 0, 0.0743550558, 3.2797245367, 1.2380219795  
C, 0, 0.7183750922, 4.4079255125, 0.734672119  
C, 0, -0.0332207157, 5.3201007626, 0.0003554196  
C, 0, -1.3996035256, 5.0951199699, -0.264166611  
C, 0, -2.0416131912, 3.9511847663, 0.1981116874  
C, 0, -1.611120328, 1.6948029566, 1.3954044313  
C, 0, 0.6049279594, 2.0690326998, 1.8454929379  
H, 0, 1.7819607251, 4.5539663433, 0.8825042555  
H, 0, -3.0733161642, 3.7475553321, -0.0634670483  
C, 0, -2.0136558051, -2.627327485, 0.3128826641  
C, 0, -2.9027943013, -1.5182299063, 0.2149484491  
C, 0, -3.915904814, -1.5011868684, -0.7408392809  
C, 0, -4.0676275813, -2.6180893931, -1.5562999545  
C, 0, -3.2016523114, -3.7238490955, -1.4455599169  
C, 0, -2.1552588709, -3.728413016, -0.5282349312  
C, 0, -0.9187818841, -2.2259095106, 1.1813512303  
C, 0, -2.3664080039, -0.4559869494, 1.0491066641  
H, 0, -4.5445258182, -0.6278658335, -0.8696466431  
H, 0, -1.4471908585, -4.5479337104, -0.496379135  
C, 0, 3.1966253698, -0.4929873792, 1.4206438773  
C, 0, 2.7276300138, -1.8272007932, 1.2314333196  
C, 0, 3.5194076886, -2.7759725088, 0.5907882701  
C, 0, 4.7924604325, -2.3960929651, 0.1749233552  
C, 0, 5.2545628607, -1.0794394607, 0.3598429141  
C, 0, 4.4563387435, -0.113483923, 0.9663808823  
C, 0, 2.0748085615, 0.2952057289, 1.9122588293  
C, 0, 1.3177205349, -1.8433472917, 1.5904440162  
H, 0, 3.1422766753, -3.7719375269, 0.3904894354  
H, 0, 4.7917751266, 0.9138559493, 1.0478363632  
N, 0, 1.0449762222, -0.5924083714, 2.0751796762  
N, 0, -0.474069056, 1.23071436, 2.0121094451  
N, 0, -1.2639404628, -0.9871321517, 1.6752684209  
N, 0, 1.871583913, 1.6229410005, 1.8733292247  
N, 0, -2.585461045, 0.8683853554, 0.9769085011  
N, 0, 0.343355867, -2.6852737532, 1.2058412977  
B, 0, -0.3230249955, -0.1789648869, 2.5517097651  
C, 0, -3.657240559, 0.6073808608, 5.4065056913  
C, 0, -3.4119044995, 0.3630187495, 6.7563155243  
C, 0, -2.1607463932, -0.1213406353, 7.1488113366  
C, 0, -1.1688289114, -0.3569800088, 6.2023839022  
C, 0, -1.4221557723, -0.1092039703, 4.8501646634  
C, 0, -2.6684728896, 0.3737494024, 4.4478424641  
H, 0, -4.6234967354, 0.9827225368, 5.0887467553  
H, 0, -4.1840003278, 0.5460485595, 7.4938194337  
H, 0, -1.9575266195, -0.3158039867, 8.1957263134

H, 0, -0.1913330207, -0.7317884523, 6.478843351  
H, 0, -2.8811219482, 0.567822814, 3.4046949759  
O, 0, -0.3843254981, -0.3707470329, 3.9759208161  
S, 0, -3.4261136374, -5.1966129447, -2.5039853045  
S, 0, -5.4188733009, -2.6049018627, -2.7841395207  
S, 0, -2.375722188, 6.3022045577, -1.2278814296  
S, 0, 0.8028536535, 6.8242476955, -0.6141331094  
S, 0, 6.916146094, -0.5820881398, -0.2141111638  
S, 0, 5.8528809766, -3.6563569932, -0.6173444149  
C, 0, -1.2018304519, 6.6673158702, -2.5834782675  
C, 0, 0.1483003018, 6.892261587, -2.3213334823  
C, 0, 1.0174293276, 7.2224393307, -3.362819165  
C, 0, 0.5256314617, 7.3620429558, -4.6607396126  
C, 0, -0.8257676976, 7.1352834571, -4.9237811851  
C, 0, -1.6872836632, 6.7700534302, -3.888583701  
H, 0, 2.0706736197, 7.3680446757, -3.1519890891  
H, 0, 1.2010395493, 7.6279658625, -5.4651950801  
H, 0, -1.2074244101, 7.2222972357, -5.9341000127  
H, 0, -2.7335327749, 6.5660465069, -4.0854303543  
C, 0, -4.207023109, -3.2865579597, -6.6319363903  
C, 0, -3.3676227041, -4.3958810593, -6.5132458279  
C, 0, -3.097669738, -4.935022011, -5.256265638  
C, 0, -3.7057347226, -4.3922762997, -4.1225248568  
C, 0, -4.5461433804, -3.2868576539, -4.2406597338  
C, 0, -4.7787677009, -2.7168205291, -5.4941913432  
H, 0, -4.4001482561, -2.8499490334, -7.604956104  
H, 0, -2.906668619, -4.8274156807, -7.3937150184  
H, 0, -2.425445041, -5.7783390825, -5.1483036258  
H, 0, -5.4095874995, -1.8387457313, -5.5725323631  
C, 0, 6.5875327323, -3.3042614657, -3.2822690084  
C, 0, 7.161795195, -2.6174261925, -4.351654518  
C, 0, 7.605357211, -1.3045663544, -4.1825828978  
C, 0, 7.478052019, -0.6783953596, -2.9425985584  
C, 0, 6.946246317, -1.3823195446, -1.8602118984  
C, 0, 6.5012118911, -2.6918677764, -2.0305398493  
H, 0, 6.2107114661, -4.3125344271, -3.4099270051  
H, 0, 7.2414922088, -3.0997973879, -5.3186799369  
H, 0, 8.0306105157, -0.7599300593, -5.0176183648  
H, 0, 7.7936401358, 0.3498577961, -2.8069691255  
C, 0, -1.9363329907, 1.0689641546, -2.8370928263  
C, 0, -1.8954105379, 2.2447042121, -3.6882663031  
C, 0, -1.0045080791, 0.9182894146, -1.8157090663  
C, 0, -0.9387439688, 3.218446785, -3.4793449541  
C, 0, -0.2727059733, 3.8384024344, -4.6162280617  
C, 0, -0.6502772903, 3.5373284211, -5.948583998  
C, 0, 0.3425744927, 3.741438136, -6.9388024476  
C, 0, -0.7106312833, -1.4509658051, -2.4080963888  
C, 0, -1.6768244533, -1.2867786009, -3.4762526366  
C, 0, -0.3775581026, -0.3745717221, -1.5946284991  
C, 0, -2.2740612181, -0.058041837, -3.6865730625  
C, 0, -2.4631559691, 0.4298990926, -5.0457440265  
C, 0, -2.1365765707, -0.3701004955, -6.169758069  
C, 0, -1.8413739282, 0.3270277771, -7.3675455534  
C, 0, -1.6691544254, 2.4958934364, -6.1727050911  
C, 0, -2.231040967, 1.8417758863, -5.0470989672  
C, 0, -1.6106171287, 1.7384676079, -7.3689549042

C, 0, 1.9977517378, -1.0066274478, -1.7080444747  
C, 0, 1.6426693087, -2.1287516997, -2.5566102715  
C, 0, 1.013452017, -0.1468514986, -1.2332811389  
C, 0, 0.3219173893, -2.344990556, -2.8978520777  
C, 0, -0.0205050875, -2.7415936796, -4.2562096651  
C, 0, 0.9829881617, -3.0033284682, -5.2228838253  
C, 0, 0.5986960176, -2.8411348975, -6.5783841616  
C, 0, -1.4998047519, -1.6788773899, -5.9418216594  
C, 0, -1.2445076814, -2.0898600429, -4.6112808993  
C, 0, -0.6237057107, -2.1896693535, -6.9312592623  
C, 0, 2.4588916002, 1.7904671981, -1.6994676155  
C, 0, 3.4768731041, 0.8863058804, -2.2003707435  
C, 0, 1.2485899752, 1.2873355863, -1.2342658274  
C, 0, 3.2531538641, -0.4771411797, -2.202128396  
C, 0, 3.675825528, -1.2835465838, -3.3383595564  
C, 0, 4.3911205066, -0.7113310931, -4.4173836502  
C, 0, 4.2860025472, -1.3827206709, -5.660738651  
C, 0, 2.3929673724, -2.7717853303, -4.858024527  
C, 0, 2.6890780213, -2.2987224029, -3.5551294251  
C, 0, 3.3037235984, -2.3973382665, -5.8787567071  
C, 0, 0.0290517652, 3.0720104906, -2.4090941531  
C, 0, 1.2932845901, 3.5845878281, -2.9019340622  
C, 0, 0.003069592, 1.9446137766, -1.5975210699  
C, 0, 2.4765814956, 2.963516819, -2.5554311102  
C, 0, 3.5182381226, 2.7863532052, -3.5586739571  
C, 0, 3.3895079656, 3.3271467562, -4.8631110808  
C, 0, 4.1341832563, 2.6816288888, -5.8817734259  
C, 0, 4.6335329821, 0.7410805621, -4.4170384206  
C, 0, 4.132117674, 1.5130038103, -3.3390950032  
C, 0, 4.7486930536, 1.408729456, -5.66161538  
C, 0, 2.1271960413, 3.9943565624, -5.2299232178  
C, 0, 1.093779793, 4.0625840519, -4.2627533762  
C, 0, 1.7110255534, 3.9668082931, -6.5847764736  
C, 0, 4.1117766787, 1.513389314, -7.9318735236  
C, 0, 3.7286627559, 2.7513578025, -7.2787483746  
C, 0, 2.5467401289, 3.3775544196, -7.6219497375  
C, 0, 3.2897918229, 0.9488049998, -8.9011455241  
C, 0, 3.6539083632, -1.2839418152, -7.9311851854  
C, 0, 4.5061587582, -0.6861987255, -6.9201431803  
C, 0, 4.7300761003, 0.6762460687, -6.920630733  
C, 0, 3.0547684297, -0.4881813061, -8.9015807823  
C, 0, 0.9457123205, -1.7286364598, -8.6320125597  
C, 0, 1.5778942696, -2.5528394551, -7.6181409801  
C, 0, 2.8977506282, -2.3360567022, -7.2766687443  
C, 0, -0.2714950015, 0.7933877274, -9.0670626518  
C, 0, -1.0106929985, -0.2661450903, -8.4068676691  
C, 0, -0.4173160858, -1.4942973612, -8.1941903655  
C, 0, 1.0378178131, 0.5787020668, -9.4848119103  
C, 0, 1.6852771928, 2.7963732107, -8.6349073804  
C, 0, 0.3177684564, 3.0112598242, -8.199222167  
C, 0, -0.6355760162, 2.0347141543, -8.4094571956  
C, 0, 2.0430987253, 1.6079277148, -9.262206479  
C, 0, 1.662742673, -0.7164867966, -9.2616901987

**C70@subphthalocyanine-dithiino-1**

C,0,4.2226433867,2.6206726441,-0.7668430714  
C,0,4.0877975513,2.231446144,-2.1330219035  
C,0,3.4443599928,3.0611352378,-3.0484554643  
C,0,2.9872634425,4.2988373806,-2.6054918698  
C,0,3.145398641,4.6950883258,-1.263190427  
C,0,3.7415836419,3.8525423,-0.3299452929  
C,0,4.7343205936,1.4706488276,-0.0370070317  
C,0,4.5268796464,0.8488385431,-2.2348297482  
H,0,3.27855912,2.740115079,-4.0700819795  
H,0,3.7998351097,4.1346778761,0.7147486786  
C,0,3.9486821911,-2.1725924734,2.4326350992  
C,0,4.1237982406,-0.8005339789,2.7814844293  
C,0,3.6028880748,-0.2986658919,3.9726559061  
C,0,2.9334122399,-1.176042322,4.8198017374  
C,0,2.7495091862,-2.5277548817,4.4680810937  
C,0,3.2432480262,-3.0333684309,3.2700368558  
C,0,4.4324894928,-2.3420998357,1.071170152  
C,0,4.6975831477,-0.1314451521,1.6245994116  
H,0,3.6857269299,0.7542390161,4.216423763  
H,0,3.0527080712,-4.0595048,2.9782156081  
C,0,3.5395693943,-2.5255759261,-3.3170838044  
C,0,3.5074740591,-3.5169351715,-2.2914952583  
C,0,2.7166311291,-4.6542019112,-2.4314713386  
C,0,1.9924004204,-4.812341501,-3.6101651637  
C,0,2.0319892083,-3.8369742009,-4.6248293423  
C,0,2.7886039821,-2.677490115,-4.4782983952  
C,0,4.2500564255,-1.3732862424,-2.7828916209  
C,0,4.2073127566,-2.9685971641,-1.1367022204  
H,0,2.6383968039,-5.3802025545,-1.6305346238  
H,0,2.7664905785,-1.8997899493,-5.2326105734  
N,0,4.699958812,-1.7615420645,-1.5505509136  
N,0,5.0085317058,0.5203004976,-0.9898420093  
N,0,4.9663874525,-1.1258958562,0.7153365378  
N,0,4.2201493091,-0.08200786,-3.1550660006  
N,0,4.6509691386,1.1664287274,1.2713246668  
N,0,4.127774119,-3.2894358072,0.1664341245  
B,0,5.5228518778,-0.8660827738,-0.6682924078  
C,0,9.1951410094,1.009310818,1.0574760973  
C,0,10.4230185242,0.568173869,0.5685550288  
C,0,10.4526360188,-0.4373363577,-0.4023755894  
C,0,9.2688644685,-0.9914572529,-0.8781889491  
C,0,8.0405112648,-0.5432583163,-0.3837312829  
C,0,8.0004809362,0.4588186911,0.5874899924  
H,0,9.1577374685,1.7871933551,1.8116149787  
H,0,11.345591427,0.9994421221,0.9377901153  
H,0,11.4015241102,-0.7899385891,-0.7902480256  
H,0,9.2644089769,-1.7700270418,-1.6305348561  
H,0,7.0584701817,0.8136941991,0.9837073764  
O,0,6.9141189286,-1.1467288213,-0.9099258983  
S,0,1.8510407792,-3.6682738777,5.5770666169  
S,0,2.2976755505,-0.5268951196,6.4062224306  
S,0,2.5750326679,6.3364429355,-0.698196032  
S,0,2.1905053502,5.4094334008,-3.8188524392  
S,0,1.1034391416,-4.0696306343,-6.1813217669  
S,0,1.0048788675,-6.3361255433,-3.8146748321  
C,0,0.9349086399,6.4023907264,-1.5052214753

C,0,0.7698646412,6.0042077444,-2.8296859402  
C,0,-0.4857916604,6.094416106,-3.4355826963  
C,0,-1.563962152,6.6154229915,-2.7220267739  
C,0,-1.3986370954,7.0115991821,-1.3924823749  
C,0,-0.1537665051,6.8896869019,-0.7781762518  
H,0,-0.609232883,5.7585743281,-4.4586808444  
H,0,-2.5347798568,6.6934738641,-3.1968069839  
H,0,-2.2400499179,7.3972748433,-0.8292016375  
H,0,-0.0192742149,7.1645807593,0.2616537337  
C,0,-1.7216069356,-1.0804175922,6.9368367094  
C,0,-1.9169146991,-2.4094674816,6.5531968177  
C,0,-0.8411091474,-3.1699185319,6.0977122579  
C,0,0.437647284,-2.6093985178,6.0562554998  
C,0,0.6299611053,-1.2799280897,6.4241742109  
C,0,-0.4526907679,-0.5090390745,6.8544401899  
H,0,-2.5580507631,-0.4819493218,7.2780718207  
H,0,-2.9064146739,-2.8489980215,6.5938922077  
H,0,-0.9842162065,-4.1951541863,5.7763205516  
H,0,-0.2961077913,0.5310757345,7.1167567178  
C,0,-1.7634335104,-6.0878405552,-4.0298433363  
C,0,-2.9474062535,-5.6060886612,-4.5863183203  
C,0,-2.9045138108,-4.6420321062,-5.5963156548  
C,0,-1.6777771431,-4.1592883376,-6.0488645858  
C,0,-0.4920408897,-4.6694740424,-5.5166443106  
C,0,-0.533990649,-5.6317625851,-4.510415822  
H,0,-1.78542268,-6.8138410184,-3.2251832979  
H,0,-3.8998699403,-5.9688217572,-4.2184270936  
H,0,-3.8237478947,-4.2512730998,-6.0161398499  
H,0,-1.6326146659,-3.3887269647,-6.8097048805  
C,0,-4.0625607968,2.6145880685,2.3447563203  
C,0,-4.7456540776,2.5371022902,1.0673689059  
C,0,-2.8750467086,3.3299682095,2.4622937387  
C,0,-4.220045527,3.1764124531,-0.037763366  
C,0,-4.2421880541,2.5156982001,-1.335967069  
C,0,-4.8778903304,1.2620362561,-1.5163836468  
C,0,-4.4052476491,0.4739036679,-2.5953192773  
C,0,-1.9111270913,1.5260714322,3.8344726096  
C,0,-3.1519410917,0.7848427802,3.7014245854  
C,0,-1.7694255677,2.7703230944,3.2266945697  
C,0,-4.2001816064,1.3156934061,2.976890859  
C,0,-4.9840485824,0.4555985267,2.1005416203  
C,0,-4.7592569667,-0.9429175543,2.0419198112  
C,0,-5.1465326378,-1.5869771623,0.8405396896  
C,0,-5.4389344753,0.5791628832,-0.3362925518  
C,0,-5.3184355079,1.204863064,0.929429975  
C,0,-5.4815506038,-0.8374537939,-0.3305788034  
C,0,0.497298537,2.1654090046,2.4837166364  
C,0,0.3391971661,0.8675617183,3.1134721716  
C,0,-0.5322482079,3.0994669366,2.5342756166  
C,0,-0.8340864309,0.5554985152,3.7688771025  
C,0,-1.4140232445,-0.771242722,3.6212877575  
C,0,-0.751725585,-1.7954652414,2.9028104998  
C,0,-1.5764242427,-2.8183955843,2.3706589843  
C,0,-3.6404970097,-1.5111863952,2.816096998  
C,0,-2.8351803861,-0.6325511986,3.5831269807  
C,0,-2.9990751563,-2.6776176465,2.3273232134

C, 0, -0.1687283114, 3.6469883059, 0.1625191528  
C, 0, 0.8991078687, 2.6673096514, 0.117796805  
C, 0, -0.8727991848, 3.8633855708, 1.3422948407  
C, 0, 1.226082323, 1.9473307495, 1.2483950878  
C, 0, 1.5317132058, 0.5296315043, 1.1339100339  
C, 0, 1.6179879219, -0.1152688156, -0.1262976756  
C, 0, 1.3742004772, -1.5132058591, -0.1233049357  
C, 0, 0.4987562562, -1.4610167277, 2.198664164  
C, 0, 0.9844169466, -0.1329542159, 2.2756664984  
C, 0, 0.8282736631, -2.1760306974, 1.0208446365  
C, 0, -2.9843321346, 3.9282319126, 0.0768164334  
C, 0, -2.2392819158, 3.7009820436, -1.1472028599  
C, 0, -2.3214373827, 4.0055536411, 1.2978528679  
C, 0, -0.8677992121, 3.5631088681, -1.1049313581  
C, 0, -0.2124841067, 2.5612618908, -1.9329901281  
C, 0, -0.9422601196, 1.7749772197, -2.8603988066  
C, 0, -0.37431515, 0.5201367529, -3.1964990817  
C, 0, 1.2644440304, 0.6565101247, -1.3337167339  
C, 0, 0.8695200037, 2.0085098585, -1.1801085458  
C, 0, 0.713027495, -0.0295677291, -2.4449999899  
C, 0, -2.4091422672, 1.9187420166, -2.9026903446  
C, 0, -3.0266872165, 2.8384543856, -2.0172360561  
C, 0, -3.1903218126, 0.7966093273, -3.2775681296  
C, 0, -0.6064974042, -1.8287981877, -3.2181839608  
C, 0, -1.1985383716, -0.584556031, -3.6706725746  
C, 0, -2.572504632, -0.4494852383, -3.7123272725  
C, 0, -1.4137999723, -2.8894545011, -2.8234828225  
C, 0, 0.0545943504, -3.312341218, -0.8955481678  
C, 0, 0.8867394868, -2.1991792671, -1.3106340864  
C, 0, 0.5669689581, -1.478023385, -2.4416810155  
C, 0, -1.0730328712, -3.6548127576, -1.6324760922  
C, 0, -2.3484945483, -3.956970756, 0.4513658868  
C, 0, -1.1648505631, -3.5994252102, 1.2113283453  
C, 0, 0.0083233913, -3.2853662661, 0.5533125481  
C, 0, -4.5004241563, -2.8643520207, -1.034752735  
C, 0, -4.5311711054, -2.8369203599, 0.4156503968  
C, 0, -3.4828292503, -3.3689141051, 1.1395786209  
C, 0, -3.4155513538, -3.4218690096, -1.7026291166  
C, 0, -3.4227191328, -1.551684625, -3.3053200651  
C, 0, -4.5515691761, -0.9747399377, -2.5983651925  
C, 0, -5.0779473325, -1.6145058916, -1.4941731807  
C, 0, -2.8603213274, -2.7462150898, -2.8669719339  
C, 0, -2.3099366355, -3.9842142774, -0.9401321734

### **C70@2subphthalocyanine-dithiino-1**

C, 0, 5.0211465281, 2.3260211588, -7.9335113543  
C, 0, 4.0016315461, 3.3112804864, -7.794436446  
C, 0, 3.9320945869, 4.0956298757, -6.645661936  
C, 0, 4.9154093555, 3.9319977536, -5.6753265927  
C, 0, 5.9537240244, 2.9935575806, -5.8401741682  
C, 0, 5.9948462909, 2.1600578588, -6.9531192549  
C, 0, 4.6745940118, 1.5055448684, -9.0796259189  
C, 0, 3.0522380459, 3.1095381743, -8.8785434324  
H, 0, 3.1177603232, 4.7959610729, -6.4989886255



H,0,6.7505825338,1.3891306659,-7.0443758958  
C,0,2.6882170644,-2.1535618399,-10.7131343131  
C,0,3.975988872,-1.9261767748,-10.147089758  
C,0,4.6802741488,-2.9655780102,-9.5425698477  
C,0,4.1149552008,-4.23588529,-9.5576970665  
C,0,2.8556426082,-4.4676302365,-10.1475980174  
C,0,2.1212640027,-3.42653932,-10.7047720174  
C,0,2.114857857,-0.8533125039,-11.0200069453  
C,0,4.1916267661,-0.4896621712,-10.126998802  
H,0,5.623279372,-2.7805780109,-9.041685326  
H,0,1.1229649876,-3.5937328491,-11.0912348178  
C,0,-0.4917026382,2.4969646582,-9.6231202307  
C,0,-0.7812937384,1.2734416047,-10.2950145301  
C,0,-2.0496422265,0.7035981256,-10.2201368453  
C,0,-3.0294021881,1.3747198015,-9.49586213  
C,0,-2.7417883529,2.5816768657,-8.8275676941  
C,0,-1.472759877,3.1472752645,-8.880209113  
C,0,0.9429460522,2.7185219625,-9.7233708965  
C,0,0.4780205297,0.7524588189,-10.8031723266  
H,0,-2.2586073737,-0.2523599389,-10.6851669143  
H,0,-1.2382384904,4.0518668531,-8.3321256196  
N,0,1.4143181936,1.7104784551,-10.5204143465  
N,0,3.5870415095,2.1125934207,-9.6600900875  
N,0,3.1069168445,0.0649624641,-10.7623520833  
N,0,1.758081348,3.4635785673,-8.9549356793  
N,0,5.019274255,0.2361619012,-9.354764285  
N,0,0.8213511484,-0.5066757925,-11.1222583733  
B,0,2.8698999155,1.5614795697,-10.8733256683  
C,0,6.6981399609,2.1670430432,-13.0559642223  
C,0,6.6910733355,3.0836151589,-14.1053072366  
C,0,5.4869086402,3.6864549305,-14.4801294574  
C,0,4.3060480136,3.3801780692,-13.8101605938  
C,0,4.3215044668,2.4625472927,-12.7562432911  
C,0,5.5183269283,1.8504237172,-12.3797236448  
H,0,7.6236911234,1.6880195353,-12.7575989128  
H,0,7.6094111837,3.3243586406,-14.6269254278  
H,0,5.4682662529,4.399653938,-15.2962469268  
H,0,3.3621076032,3.8361619166,-14.0809657126  
H,0,5.5440347972,1.1236586947,-11.579050412  
O,0,3.1100742235,2.2043598632,-12.1393341101  
S,0,2.143622631,-6.1491120481,-10.196267071  
S,0,5.04169009,-5.6037964198,-8.7773072339  
S,0,7.3080870102,2.8778587546,-4.6211799074  
S,0,4.8297231924,4.977948705,-4.1808247513  
S,0,-4.0339488792,3.4255859618,-7.8489940532  
S,0,-4.7078980697,0.6540973539,-9.4319593461  
C,0,6.3411640511,2.8834219252,-3.0695463761  
C,0,5.2668020667,3.7512201273,-2.8933623963  
C,0,4.5361473935,3.7339927193,-1.7027106482  
C,0,4.9251294902,2.888229994,-0.6634499242  
C,0,6.0234341696,2.040382741,-0.8322053811  
C,0,6.7156284105,2.0197430767,-2.0404799527  
H,0,3.6716038155,4.3836815564,-1.6057590148  
H,0,4.3565855631,2.8689552959,0.2623314519  
H,0,6.3393055094,1.3706988754,-0.042089995  
H,0,7.5492128855,1.3425524662,-2.1867549346

C,0,2.9144233148,-7.5267613082,-5.8574143218  
C,0,1.6846326863,-7.7773833745,-6.4685782674  
C,0,1.4467594845,-7.3294340203,-7.7676171688  
C,0,2.4533414364,-6.6633197753,-8.4676396531  
C,0,3.6840963797,-6.4193806225,-7.8603653898  
C,0,3.9087994002,-6.8325565728,-6.5462735984  
H,0,3.0942751298,-7.8530617061,-4.8399147138  
H,0,0.9040818156,-8.3007840156,-5.929437565  
H,0,0.4853772399,-7.4910011943,-8.2411509048  
H,0,4.8579220261,-6.6100773059,-6.0720716618  
C,0,-5.5925991935,-0.2730585525,-6.9534493638  
C,0,-5.8786714384,-0.1572376086,-5.5944427666  
C,0,-5.5591269204,1.0165375291,-4.9082909939  
C,0,-4.9654913702,2.0809180269,-5.5855714203  
C,0,-4.7231348375,1.9818996475,-6.9569635862  
C,0,-5.0256768667,0.8044419849,-7.6368653411  
H,0,-5.802003292,-1.1926518305,-7.4873331117  
H,0,-6.3247775607,-0.991878864,-5.0661820209  
H,0,-5.7518513452,1.0976019141,-3.8451021876  
H,0,-4.686941176,2.9851305048,-5.0567234613  
C,0,-0.7574396825,3.4011528351,1.4675650323  
C,0,0.6594620401,3.5476986886,1.4281546827  
C,0,1.2599616788,4.3356560413,0.4481088072  
C,0,0.4397293235,5.0057008243,-0.4551181131  
C,0,-0.9633572664,4.8871619985,-0.3896622416  
C,0,-1.5706812907,4.0662253932,0.5546451953  
C,0,-1.0552541909,2.3292142914,2.4007156983  
C,0,1.2207752274,2.5761609616,2.354770676  
H,0,2.339537394,4.3989767982,0.3731428487  
H,0,-2.644055182,3.9191429066,0.5559938708  
C,0,-1.8755949746,-2.0195884675,3.0470616579  
C,0,-2.7118095532,-0.923783793,2.6851326181  
C,0,-3.8851759638,-1.1321969925,1.9632454959  
C,0,-4.2354696736,-2.4392818062,1.6425734385  
C,0,-3.4096366244,-3.52337695,2.0033160166  
C,0,-2.2199037392,-3.3231492403,2.6941008043  
C,0,-0.6266113417,-1.4634852389,3.5439990558  
C,0,-1.9785898116,0.2968587379,2.9747965149  
H,0,-4.4887477666,-0.2959466623,1.6308589758  
H,0,-1.5541042687,-4.1508004027,2.9084366644  
C,0,3.5842859792,-0.2243337496,2.6323836886  
C,0,2.9970796885,-1.4809266835,2.9662190379  
C,0,3.6055610169,-2.672151896,2.5813543229  
C,0,4.8297335241,-2.6024125672,1.922611745  
C,0,5.4342409199,-1.362762928,1.6383630719  
C,0,4.8048509726,-0.1658763571,1.9676643057  
C,0,2.5908636834,0.8024895681,2.909133877  
C,0,1.664291456,-1.2121554213,3.4857081083  
H,0,3.1214489056,-3.6257706471,2.7573052082  
H,0,5.2392187029,0.7891769618,1.6992328502  
N,0,1.5485551648,0.1517670455,3.5129801204  
N,0,0.1440381809,1.9882153105,2.9782456326  
N,0,-0.8129119677,-0.0997420155,3.5835621908  
N,0,2.4502237318,2.0316777209,2.3789120226  
N,0,-2.1325650261,1.5270814089,2.4543653252  
N,0,0.5949896322,-2.0211000334,3.5732745143

B, 0, 0.2995587907, 0.8543835186, 3.9745923496  
C, 0, -2.5819601994, 2.7528352145, 6.8021498555  
C, 0, -2.2051162043, 2.8245379786, 8.1415243122  
C, 0, -0.9482833117, 2.348560374, 8.5262230563  
C, 0, -0.0820329342, 1.8048825871, 7.5827904569  
C, 0, -0.467731234, 1.7344825986, 6.2413131672  
C, 0, -1.7191088767, 2.2109835594, 5.8466216916  
H, 0, -3.5524144435, 3.1207958438, 6.4889764699  
H, 0, -2.8793511136, 3.2461428014, 8.8771352986  
H, 0, -0.6429575409, 2.3997726018, 9.5650496851  
H, 0, 0.8959979467, 1.4287831204, 7.8556239233  
H, 0, -2.0292733201, 2.1729837511, 4.8110086743  
O, 0, 0.4506884989, 1.1832067121, 5.3668546089  
S, 0, -3.869597784, -5.2325544387, 1.5535356255  
S, 0, -5.8130013531, -2.7146327275, 0.7634122633  
S, 0, -2.0351054521, 5.8166067711, -1.5375727728  
S, 0, 1.229654498, 6.0494065084, -1.7306313463  
S, 0, 7.0755516992, -1.293606508, 0.8354564394  
S, 0, 5.624582101, -4.1669004969, 1.418473777  
C, 0, -1.1608270626, 5.5039382449, -3.1134434574  
C, 0, 0.2269901214, 5.6002304516, -3.1979864519  
C, 0, 0.8721521657, 5.3958514668, -4.4191999023  
C, 0, 0.1192402175, 5.1394977786, -5.5669689235  
C, 0, -1.2713075414, 5.0453699395, -5.4815365612  
C, 0, -1.9096536965, 5.2068330018, -4.2523042833  
H, 0, 1.9561062023, 5.4367177513, -4.4574465543  
H, 0, 0.6186275651, 4.9749216412, -6.5177882683  
H, 0, -1.8707857833, 4.8233132819, -6.356624241  
H, 0, -2.9870371165, 5.1144732408, -4.1750192684  
C, 0, -5.3877661905, -4.7187370571, -2.7783597975  
C, 0, -4.5356331569, -5.7738731652, -2.448097403  
C, 0, -4.0406498466, -5.8927704962, -1.1496152855  
C, 0, -4.4298141638, -4.9761857338, -0.170878409  
C, 0, -5.2712819627, -3.9164249488, -0.5039719892  
C, 0, -5.7379529316, -3.7763476616, -1.8121944367  
H, 0, -5.7606327748, -4.6160690886, -3.7905805152  
H, 0, -4.2392728209, -6.4931510617, -3.2023538629  
H, 0, -3.3584085869, -6.6934604611, -0.8886604625  
H, 0, -6.3716810129, -2.9334606453, -2.0631508759  
C, 0, 6.0344473691, -4.6489159367, -1.2959447421  
C, 0, 6.5551972533, -4.3746684129, -2.5611599133  
C, 0, 7.1919616197, -3.1577661479, -2.807578589  
C, 0, 7.3060655368, -2.2119944758, -1.7887789672  
C, 0, 6.8203685517, -2.5027868518, -0.5140589291  
C, 0, 6.1876294811, -3.7201718736, -0.2652200828  
H, 0, 5.5141808072, -5.5797263502, -1.1016280701  
H, 0, 6.4434716014, -5.1024525192, -3.3564323464  
H, 0, 7.580915896, -2.9342139434, -3.7937193042  
H, 0, 7.7724846161, -1.2524305184, -1.978241121  
C, 0, -2.1276413693, -0.0420248522, -1.0644943573  
C, 0, -1.7943762393, 1.1172176854, -1.8716493449  
C, 0, -1.233286292, -0.5025355074, -0.1047698368  
C, 0, -0.5927220885, 1.773478238, -1.6803830804  
C, 0, 0.1710284175, 2.2428638999, -2.8273950193  
C, 0, -0.3331681755, 2.117082706, -4.1435348037  
C, 0, 0.6347699136, 2.079543154, -5.1771540138

C, 0, -1.6510736658, -2.8274205822, -0.7949088382  
C, 0, -2.5730415194, -2.3407709222, -1.804238954  
C, 0, -0.9884199209, -1.9296223017, 0.0327319671  
C, 0, -2.8067136941, -0.9849199159, -1.9354226832  
C, 0, -2.9088378726, -0.3941685679, -3.2624991472  
C, 0, -2.8708121748, -1.1936258052, -4.4325103287  
C, 0, -2.443350038, -0.5455930871, -5.6183350643  
C, 0, -1.6145576647, 1.4230292128, -4.3517632302  
C, 0, -2.2909626242, 0.8970615182, -3.2227687185  
C, 0, -1.826496964, 0.7437489301, -5.5790462146  
C, 0, 1.1051169411, -3.1986031724, -0.2274905748  
C, 0, 0.4100353652, -4.1249138569, -1.1024347825  
C, 0, 0.4229109346, -2.1217639539, 0.3283837991  
C, 0, -0.9318792843, -3.9454049706, -1.3776646306  
C, 0, -1.4256626316, -4.1526883062, -2.7320486038  
C, 0, -0.5819851627, -4.6360485637, -3.7626567656  
C, 0, -0.9639637302, -4.3056185962, -5.0878007556  
C, 0, -2.6251936263, -2.6393113712, -4.2922748719  
C, 0, -2.4302243959, -3.1690294331, -2.99250962  
C, 0, -1.9706787571, -3.3234026159, -5.348779008  
C, 0, 2.3262055815, -0.645059861, -0.1605668054  
C, 0, 3.0325657265, -1.7698407582, -0.7408371283  
C, 0, 1.0508608533, -0.8113421113, 0.3654779846  
C, 0, 2.4362266714, -3.0157448961, -0.7750350328  
C, 0, 2.5634623414, -3.843908629, -1.9655393416  
C, 0, 3.3688917554, -3.4416272705, -3.0611201032  
C, 0, 3.0282710125, -3.9929493898, -4.3212584709  
C, 0, 0.8496837145, -4.8294207096, -3.4685336208  
C, 0, 1.3214622066, -4.5246109419, -2.1664125835  
C, 0, 1.7845034926, -4.6716536394, -4.5217240584  
C, 0, 0.3381807896, 1.2997921886, -0.675196919  
C, 0, 1.6739565322, 1.4681703387, -1.2164640641  
C, 0, 0.0278589502, 0.190920133, 0.1048578494  
C, 0, 2.6436991651, 0.519335195, -0.9646327332  
C, 0, 3.5552754201, 0.113031863, -2.0250893155  
C, 0, 3.5329570435, 0.740071791, -3.2965218891  
C, 0, 4.0193416035, -0.0377957506, -4.3788362659  
C, 0, 4.0090677824, -2.1151691401, -3.0198902093  
C, 0, 3.7937867103, -1.2919398392, -1.8874958436  
C, 0, 4.255837757, -1.4423812313, -4.2431033151  
C, 0, 2.4934096002, 1.7533190193, -3.5651676475  
C, 0, 1.5641965736, 2.0650268574, -2.5406281177  
C, 0, 2.0236286086, 1.9025362386, -4.8945117628  
C, 0, 3.5763111654, -1.0472890722, -6.4691688555  
C, 0, 3.5861176413, 0.2108585184, -5.7475891185  
C, 0, 2.6114157807, 1.1546530854, -5.9961801804  
C, 0, 2.5836164714, -1.3082463555, -7.4088028925  
C, 0, 2.3476529159, -3.6006861618, -6.5462258752  
C, 0, 3.38066635, -3.3207314004, -5.5656409366  
C, 0, 3.9774583864, -2.07543721, -5.5261713132  
C, 0, 1.9518947796, -2.6174701805, -7.4458257132  
C, 0, -0.406808233, -3.2319082407, -7.1140298938  
C, 0, 0.0119747313, -4.2490267192, -6.1675275313  
C, 0, 1.352742737, -4.4264448437, -5.8900403299  
C, 0, 0.5399929561, -2.4294032337, -7.7426150823  
C, 0, -0.8797506913, -0.4510003258, -7.3836270781

C, 0, -1.8621318115, -1.2928613918, -6.726067847  
C, 0, -1.6295586039, -2.6479829766, -6.5932404449  
C, 0, 0.2960484243, -1.0015397408, -7.8846309093  
C, 0, 1.5799944154, 0.896820327, -6.9836117117  
C, 0, 0.3492258514, 1.4619634572, -6.4624137996  
C, 0, -0.8492942898, 0.8050202769, -6.6565543063  
C, 0, 1.5620070895, -0.3063647222, -7.6847142668

### **C<sub>60</sub>@dibenzo[a,g]corannulene**

C, 0, -2.9814015893, -0.2229104206, 3.8405663928  
C, 0, -2.9479768587, 1.1985507642, 3.5742647171  
C, 0, -3.3876765206, 1.7302559443, 2.2716703891  
C, 0, -4.002437067, 0.8174507643, 1.4472467061  
C, 0, -4.0430996987, -0.5890971127, 1.7176117753  
C, 0, -3.1977575561, -2.5833895131, 2.6848667197  
C, 0, -3.0324661239, 2.9670386415, 1.629215048  
C, 0, -3.1491637818, 3.1429599956, 0.2523468665  
C, 0, -3.6319564031, 2.0985120592, -0.6105520929  
C, 0, -4.1208597218, 0.9959832913, 0.0499181009  
C, 0, -4.2354794828, -0.2990580538, -0.5524595105  
C, 0, -4.1922464912, -1.2660033016, 0.4820484916  
C, 0, -3.7819523314, -2.5718697328, 0.2804305351  
C, 0, -3.3546591035, -3.2540287003, 1.479522471  
C, 0, -3.5736503822, -2.9238541789, -1.1046529905  
C, 0, -3.6043674974, -1.9703551837, -2.1131806314  
C, 0, -3.8596818965, -0.5729734686, -1.8433065899  
C, 0, -3.5325297201, 0.6079443229, -2.662302433  
C, 0, -3.4254097636, 1.9182855377, -2.0588813242  
C, 0, -3.4646060305, -1.1686036737, 2.8185454036  
H, 0, -3.0519629975, -4.2947631129, 1.4203287639  
H, 0, -3.2874130168, -3.9397625452, -1.3581391642  
H, 0, -3.3353556278, -2.2824991082, -3.1167880577  
H, 0, -2.76123066, 4.0614245107, -0.1756073031  
H, 0, -2.559661214, 3.7575642268, 2.2025726059  
H, 0, -2.772933236, -3.1304523699, 3.5198969334  
C, 0, -2.3950091853, 2.0482025626, 4.5495572093  
C, 0, -1.8923998735, 1.5567382618, 5.7443087908  
H, 0, -2.3685736227, 3.1155634271, 4.3579265023  
C, 0, -2.4576777955, -0.6870576072, 5.0611178494  
C, 0, -1.9235157081, 0.1797641411, 6.0017195931  
H, 0, -1.4756397209, 2.2373996988, 6.4772864026  
H, 0, -2.4796657182, -1.7515687941, 5.2682256618  
H, 0, -1.5306223181, -0.2080222002, 6.9341717336  
C, 0, -3.0237833346, 2.99603997, -2.8688302986  
C, 0, -2.7365168002, 2.8291819751, -4.2146465903  
H, 0, -2.943410166, 3.9820704425, -2.4238983852  
C, 0, -3.2281424818, 0.4744205883, -4.0294101995  
C, 0, -2.8389507008, 1.5597388352, -4.7988616458  
H, 0, -2.4326252236, 3.6799552953, -4.8130443056  
H, 0, -3.3066371185, -0.504892815, -4.4891329906  
H, 0, -2.6142251879, 1.4254427642, -5.8503716981  
C, 0, 0.8560754743, -2.519172601, 2.2251092135

C,0,0.1272919542,-1.2776424322,2.4460987201  
C,0,-0.6776939571,-0.7620832759,1.4394836212  
C,0,-0.7994112992,-1.4614350399,0.1695150369  
C,0,-0.1100599405,-2.6484280604,-0.0405594617  
C,0,0.7405001843,-3.1880204772,1.0116931951  
C,0,2.1583507825,-2.3939723979,2.8663577366  
C,0,2.2314305978,-1.076188766,3.4850056865  
C,0,0.9740877765,-0.386172931,3.2273769694  
C,0,0.9727553043,0.9794294101,2.967216303  
C,0,-0.677188419,0.6672313662,1.1665092105  
C,0,-0.8748613171,-0.4647293593,-0.8876581931  
C,0,-0.2587264192,-0.695476126,-2.1100376365  
C,0,0.4701600421,-1.937157665,-2.329842647  
C,0,0.542947055,-2.8900821332,-1.3200257653  
C,0,1.7999688084,-3.5789945064,-1.058555152  
C,0,1.9220282519,-3.7630779533,0.3821134652  
C,0,3.1632487859,-3.6445254407,0.9947202952  
C,0,3.284183672,-2.9438980564,2.2663082618  
C,0,3.42801735,-0.3700775411,3.4735609914  
C,0,4.6083185985,-0.9467923657,2.8433721611  
C,0,4.5384024307,-2.2027839235,2.2544355908  
C,0,5.1926154866,-2.4453898495,0.9756571429  
C,0,4.3427656903,-3.3364653435,0.1969525721  
C,0,4.2264309682,-3.161015462,-1.1761495065  
C,0,2.9248660576,-3.2850090861,-1.8189162241  
C,0,2.848405562,-2.2866805408,-2.8771853721  
C,0,1.6506550226,-1.6282932307,-3.1259772181  
C,0,-0.7989297861,0.8508371712,-0.2704268081  
C,0,2.918512433,1.8268226344,-2.7926229818  
C,0,1.7922285521,2.3768539592,-2.1933677512  
C,0,1.9138427887,3.0771257656,-0.9206431361  
C,0,3.1548510645,3.1952251612,-0.3075967892  
C,0,4.3353231467,2.6181017925,-0.9367079719  
C,0,4.9505866162,0.7093909035,-2.3692874694  
C,0,4.1006782315,-0.1811952926,-3.1483184774  
C,0,2.8448004523,0.5094997092,-3.4101585709  
C,0,1.648165784,-0.1965395277,-3.3992787925  
C,0,0.4657087723,0.3805380758,-2.7730355295  
C,0,0.5363559823,1.6375857272,-2.1836340684  
C,0,0.7334713338,2.7703947451,-0.1231239866  
C,0,0.8499395897,2.5947431886,1.2515553723  
C,0,2.1522777919,2.7175302896,1.8936118207  
C,0,3.2768832617,3.0111823138,1.1327528916  
C,0,4.5327421648,2.3203643681,1.3934349497  
C,0,5.1869245565,2.0776328503,0.1145380992  
C,0,5.8838659434,0.894570065,-0.0956772424  
C,0,5.7629297972,0.1942340514,-1.3672684961  
C,0,4.1026752638,-1.5456431225,-2.8884580119  
C,0,4.954290412,-2.0859603463,-1.8372987783  
C,0,5.7649562644,-1.2368714915,-1.0949076904  
C,0,5.8869643463,-1.4208778476,0.345157191  
C,0,5.9603313269,-0.1034770857,0.9626682946  
C,0,5.3361710893,0.1278715989,2.1817793663  
C,0,4.6054651074,1.3686271956,2.402543064  
C,0,3.4263247439,1.0609661006,3.2011000164  
C,0,2.2282634231,1.7192483758,2.9531675389

C, 0, -0.1133730885, 1.878835618, -0.9029055308  
C, 0, 0.1252116264, 1.5190146226, 1.9131136884  
C, 0, 4.2198284331, 1.9502253513, -2.1491409486

### **C<sub>60</sub>@2dibenzo[a,g]corannulene**

C, 0, 6.4274930168, -2.5155448114, 0.2165983076  
C, 0, 6.4129329341, -2.1101401143, -1.171856313  
C, 0, 6.4549864903, -0.6831597824, -1.5392551938  
C, 0, 6.7080176446, 0.179308475, -0.4985074978  
C, 0, 6.7299526017, -0.2260561985, 0.8758050818  
C, 0, 6.090896935, -1.6314405552, 2.6771981114  
C, 0, 6.0034043076, -0.0434390233, -2.7455782029  
C, 0, 5.6872833905, 1.3124589828, -2.7878912766  
C, 0, 5.7943382511, 2.1552971608, -1.6277060771  
C, 0, 6.3866648945, 1.5552931981, -0.5414792875  
C, 0, 6.2073282614, 2.0092206705, 0.80578884  
C, 0, 6.4262883652, 0.9077702591, 1.6692302161  
C, 0, 5.8774640598, 0.8197591862, 2.936309538  
C, 0, 5.805126383, -0.5231303482, 3.4625187635  
C, 0, 5.2124291351, 2.0211945799, 3.3828667932  
C, 0, 4.9896446823, 3.0929728427, 2.5292545137  
C, 0, 5.4200003617, 3.0792226119, 1.1491259234  
C, 0, 4.9401106606, 3.8900368267, 0.0156946025  
C, 0, 5.1289864317, 3.4399635828, -1.3458703004  
C, 0, 6.4913348781, -1.5111067699, 1.2930878505  
H, 0, 5.4212841575, -0.6815387394, 4.4654253791  
H, 0, 4.7851323016, 2.0530704449, 4.3801852944  
H, 0, 4.390993491, 3.9199737935, 2.8962829496  
H, 0, 5.2491451068, 1.7022512413, -3.7007355014  
H, 0, 5.7942810682, -0.6398483388, -3.6274910672  
H, 0, 5.9131523566, -2.6143670606, 3.1006454254  
C, 0, 6.2584085034, -3.1034266383, -2.1560848286  
C, 0, 6.1259421065, -4.4431438699, -1.8255411204  
H, 0, 6.2475798784, -2.8074403339, -3.1996009184  
C, 0, 6.2857521464, -3.8829945146, 0.5155912728  
C, 0, 6.1394400386, -4.8356301387, -0.4806254426  
H, 0, 6.0108529579, -5.1848753696, -2.6071152872  
H, 0, 6.2960560424, -4.194533321, 1.5545178116  
H, 0, 6.0348991348, -5.8818450305, -0.2184328362  
C, 0, 4.5792169711, 4.209907369, -2.386706647  
C, 0, 3.8736697208, 5.3764701869, -2.1360230848  
H, 0, 4.7188427896, 3.8795399802, -3.4104219994  
C, 0, 4.2135131925, 5.0748806587, 0.2334642767  
C, 0, 3.688992519, 5.8115708445, -0.8170462354  
H, 0, 3.4653922609, 5.9500209904, -2.9598295476

H,0,4.0682684572,5.4191739922,1.2517545967  
H,0,3.1370392012,6.7224439871,-0.6172234468  
C,0,2.1654893867,-2.4709046456,2.1946183908  
C,0,3.0087488063,-2.2765019419,1.0233686747  
C,0,3.4593345456,-1.0033331428,0.7017816078  
C,0,3.0971335356,0.1335733815,1.5338730546  
C,0,2.2975160127,-0.0511390196,2.6541072408  
C,0,1.8177402689,-1.3849324517,2.9901031461  
C,0,1.1686484275,-3.4814536781,1.8654391257  
C,0,1.3995827359,-3.9121981047,0.4923333973  
C,0,2.5398856786,-3.1688238048,-0.028142823  
C,0,2.5464734414,-2.7461760301,-1.352484396  
C,0,3.4646168204,-0.5612627288,-0.6842733185  
C,0,2.8799361391,1.2784078084,0.6622241305  
C,0,1.8719703699,2.1899759442,0.9463984674  
C,0,1.0281142866,1.9942064395,2.1176590584  
C,0,1.2358299467,0.9006703268,2.9513194989  
C,0,0.0972487849,0.1540824135,3.4707976665  
C,0,0.456567634,-1.2580000118,3.4945126845  
C,0,-0.4938556807,-2.2223607427,3.1814563812  
C,0,-0.1289933984,-3.3604217356,2.3474316853  
C,0,0.3205695551,-4.2006467503,-0.3343917071  
C,0,-1.0396947728,-4.0749925004,0.1711559552  
C,0,-1.2594130897,-3.6648045686,1.4806258289  
C,0,-2.3242601381,-2.7155814853,1.7798251078  
C,0,-1.850607245,-1.8229669018,2.8311852855  
C,0,-2.1927599375,-0.476013558,2.8074450664  
C,0,-1.1958972076,0.5355858764,3.1345933851  
C,0,-1.4129405131,1.6822916833,2.2611998728  
C,0,-0.3276941427,2.3944443661,1.7644780212  
C,0,3.1075231667,0.8477428016,-0.7092246385  
C,0,-1.1685780547,2.1201739665,-1.8254062272  
C,0,0.1292251124,1.9991885834,-2.3072220997  
C,0,0.4926854742,0.8590991542,-3.1397230326  
C,0,-0.4573223511,-0.1059452645,-3.4521843142  
C,0,-1.8184550325,0.0211505131,-2.9484480028  
C,0,-3.0018461092,0.9070340927,-0.9785704383  
C,0,-2.5307875883,1.7988512715,0.069804658  
C,0,-1.3980668887,2.5505659044,-0.4515714529  
C,0,-0.3196191853,2.8395637925,0.3758488727  
C,0,1.041348279,2.7139282486,-0.1298503679  
C,0,1.2607043329,2.3041599909,-1.4402447383  
C,0,1.8488025769,0.4585379877,-2.7877155985  
C,0,2.1918846807,-0.8889654288,-2.7641279939  
C,0,1.1953947133,-1.9002947034,-3.0911356529  
C,0,-0.0974539915,-1.5181174847,-3.4272249941  
C,0,-1.2355992695,-2.2644763272,-2.9079770252  
C,0,-2.3000253073,-1.3140353311,-2.6125940123  
C,0,-3.0993702855,-1.5006982637,-1.49280842  
C,0,-3.458413161,-0.3631038255,-0.6581440911  
C,0,-2.539829303,1.3765523444,1.3918902252  
C,0,-3.0214724209,0.0448039385,1.7283727177  
C,0,-3.4683374679,-0.8049183838,0.7267038459  
C,0,-3.1132711227,-2.217212197,0.7517748491  
C,0,-2.8858358801,-2.6484402806,-0.6214624358  
C,0,-1.8732096039,-3.5549881765,-0.9054414131



C, 0, -1.0277272357, -3.358332272, -2.0760016928  
C, 0, 0.3279639629, -3.7576754322, -1.7228379773  
C, 0, 1.4140909531, -3.047346301, -2.2190432673  
C, 0, 2.3199818641, 1.3495785617, -1.7366946518  
C, 0, 3.0219458666, -1.4113898801, -1.6881877213  
C, 0, -2.1638239359, 1.1068340363, -2.152754229  
C, 0, -4.9885498062, 3.8789225692, 0.2206939354  
C, 0, -5.1314582849, 3.497629923, -1.1679849004  
C, 0, -5.7825082439, 2.2271303874, -1.5376675015  
C, 0, -6.3893418949, 1.5608364108, -0.4988559123  
C, 0, -6.2408460435, 1.9385330635, 0.8751468253  
C, 0, -5.0896227945, 2.9460931724, 2.6859092122  
C, 0, -5.6537576775, 1.4552621139, -2.7442590216  
C, 0, -5.9551315255, 0.0958923694, -2.7849026424  
C, 0, -6.4151791182, -0.6156009712, -1.6232878715  
C, 0, -6.6980773017, 0.1833342266, -0.5398251046  
C, 0, -6.7413827833, -0.3001116351, 0.809123383  
C, 0, -6.4655863793, 0.7889529123, 1.6706470434  
C, 0, -5.9412508661, 0.6367619507, 2.942398972  
C, 0, -5.3105249685, 1.822647874, 3.4719659344  
C, 0, -5.8609522822, -0.7328391951, 3.3932222619  
C, 0, -6.1156486629, -1.7979896742, 2.5400660439  
C, 0, -6.4915320506, -1.6035228062, 1.1575184548  
C, 0, -6.395131147, -2.544159413, 0.0267420801  
C, 0, -6.36363077, -2.0604485378, -1.33608218  
C, 0, -5.4843197122, 3.0021001346, 1.2966054693  
H, 0, -4.908046478, 1.8064709707, 4.4800617907  
H, 0, -5.4961883228, -0.9435811214, 4.3935970975  
H, 0, -5.9332108802, -2.80120901, 2.9104870909  
H, 0, -5.72934648, -0.4461384844, -3.6972387954  
H, 0, -5.2086258625, 1.901610509, -3.6272720847  
H, 0, -4.517580993, 3.7620281531, 3.1148813496  
C, 0, -4.5434533597, 4.3164239035, -2.1490407889  
C, 0, -3.8456185728, 5.4670316214, -1.8158062235  
H, 0, -4.644331038, 4.0367355896, -3.1921978276  
C, 0, -4.2758950066, 5.0536118817, 0.5218301041  
C, 0, -3.712636236, 5.8392186565, -0.4714200928  
H, 0, -3.4045291201, 6.0772879871, -2.5951055846  
H, 0, -4.1677933417, 5.3475376206, 1.5602970313  
H, 0, -3.1690762809, 6.7387800295, -0.2076298011  
C, 0, -6.1769362792, -2.9935299809, -2.3724955625  
C, 0, -6.0243019934, -4.34681062, -2.1159040145  
H, 0, -6.1524750183, -2.637926013, -3.3969306314  
C, 0, -6.235983734, -3.9243931342, 0.2501184306  
C, 0, -6.0536093143, -4.8154962757, -0.7954456971  
H, 0, -5.8814853028, -5.0407605797, -2.9358279315  
H, 0, -6.2580558082, -4.2948534745, 1.2692905639  
H, 0, -5.9334689543, -5.8728824413, -0.5912474527

### **C<sub>70</sub>@dibenzo[a,g]corannulene-1**

C, 0, 10.2472719749, 0.6034519944, -2.6654882759  
C, 0, 10.1965602185, 1.9482957198, -2.134983482  
C, 0, 10.5407596354, 2.2147122938, -0.7266390192  
C, 0, 11.0939228803, 1.1522299416, -0.051143262  
C, 0, 11.1516290081, -0.1773844946, -0.5820414866

C,0,10.3737658526,-1.937296006,-1.9696008937  
C,0,10.142368445,3.3114784163,0.1141258483  
C,0,10.1608974404,3.2198665404,1.503998176  
C,0,10.5795450373,2.0229472728,2.1826850625  
C,0,11.1127234586,1.059271286,1.3591546216  
C,0,11.1821744708,-0.3284125477,1.7092501102  
C,0,11.2107484847,-1.0795542889,0.5085308319  
C,0,10.7843489125,-2.3934030861,0.4276139141  
C,0,10.4424963283,-2.8277231955,-0.9066844652  
C,0,10.4772797112,-2.9996726753,1.7019770291  
C,0,10.4383427483,-2.2565605044,2.874000748  
C,0,10.7151560423,-0.8375310363,2.8947567769  
C,0,10.3347969508,0.1706661144,3.9004107532  
C,0,10.2723781912,1.5734089788,3.5525199937  
C,0,10.6524201413,-0.5273367595,-1.8112932462  
H,0,10.1340596659,-3.855722332,-1.068786507  
H,0,10.1714651212,-4.0405950845,1.7358969853  
H,0,10.0978836351,-2.749916192,3.7782429405  
H,0,9.744500714,4.0453590031,2.0717285955  
H,0,9.7124934477,4.2036070259,-0.3291076802  
H,0,10.0085549305,-2.3083106714,-2.9214072433  
C,0,9.7192202683,2.9772370264,-2.9669364134  
C,0,9.3067203919,2.7309897718,-4.2672322205  
H,0,9.6803981731,3.9886279814,-2.5768017749  
C,0,9.8155231122,0.3892210953,-3.9872236821  
C,0,9.3548649432,1.4282104603,-4.7807812652  
H,0,8.9472091585,3.5456515418,-4.8847399293  
H,0,9.8513029126,-0.6163184709,-4.392345483  
H,0,9.0325144991,1.2320002755,-5.7965550663  
C,0,9.8190850486,2.4834333406,4.5246832218  
C,0,9.440805094,2.0679497536,5.7919004058  
H,0,9.7716939187,3.5372070916,4.2718219243  
C,0,9.9378995822,-0.2159254459,5.1935879722  
C,0,9.5002803774,0.7091274097,6.1285766059  
H,0,9.0992330346,2.7938963185,6.5203014802  
H,0,9.9826560617,-1.2658707958,5.4621496176  
H,0,9.2046541237,0.3807452642,7.1180083035  
C,0,7.0333399361,1.8018862422,2.1757135652  
C,0,6.2280252096,2.8168439034,1.5244202272  
C,0,7.7813007138,0.912150817,1.4135225842  
C,0,6.2096488668,2.9077380812,0.1453535777  
C,0,4.9537223829,3.161963541,-0.5469616889  
C,0,3.7546353206,3.4158635268,0.1654729779  
C,0,2.548764098,3.1178166405,-0.517554664  
C,0,7.0932131075,-0.9453544271,2.8723751273  
C,0,6.306931895,-0.0129987414,3.6582494215  
C,0,7.8134860385,-0.4969467579,1.7712169776  
C,0,6.277924568,1.3257951995,3.3186951672  
C,0,5.0217751531,2.0610574884,3.3774225074  
C,0,3.8351136674,1.4612719396,3.8694737136  
C,0,2.6163356056,2.0171436319,3.4053953011  
C,0,3.7742342435,3.3189219072,1.6362936988  
C,0,4.9913544675,2.9758244974,2.2771840606  
C,0,2.5863889535,2.9317131806,2.3060528985  
C,0,7.092251348,-2.4586514839,0.4725460858  
C,0,6.3338393755,-2.9159571405,1.621607656

C, 0, 7.8135169183, -1.2718086351, 0.5411597698  
C, 0, 6.3344407958, -2.178917412, 2.7904347549  
C, 0, 5.0975748657, -2.0095051385, 3.5405349608  
C, 0, 3.9015824815, -2.6645105825, 3.152600837  
C, 0, 2.692452985, -2.0531295348, 3.5691946801  
C, 0, 3.865703007, 0.0328701477, 4.2315217994  
C, 0, 5.0804859071, -0.6809483507, 4.0722673671  
C, 0, 2.6748877181, -0.7250987693, 4.1000350152  
C, 0, 7.0321905679, -0.643520712, -1.707119021  
C, 0, 6.2737033167, -1.8784939032, -1.7676619261  
C, 0, 7.7822065443, -0.3422328131, -0.5761403396  
C, 0, 6.3028228312, -2.7625408531, -0.7060604986  
C, 0, 5.0770072688, -3.4244323924, -0.2813392244  
C, 0, 3.8621463345, -3.2594362003, -0.9931660691  
C, 0, 2.6719181323, -3.4679517715, -0.2518630141  
C, 0, 3.9007737581, -3.4504986377, 1.9056747832  
C, 0, 5.0960317925, -3.5185329132, 1.1463737262  
C, 0, 2.6909346549, -3.56201339, 1.1752596524  
C, 0, 6.9956254016, 1.9884339327, -0.6546307422  
C, 0, 6.2093207388, 1.6651289443, -1.8297568333  
C, 0, 7.7619869726, 1.0076823164, -0.0359017063  
C, 0, 6.2269680296, 0.3825235154, -2.342708425  
C, 0, 4.9888037999, -0.2274634442, -2.8081137443  
C, 0, 3.7714735389, 0.4989552575, -2.8400342041  
C, 0, 2.58324242, -0.2717946884, -2.7776036997  
C, 0, 3.831247762, -2.3166153794, -2.1257455667  
C, 0, 5.0176706173, -1.6142767212, -2.4559633973  
C, 0, 2.6125625918, -1.6579684473, -2.4262809622  
C, 0, 3.7529980366, 1.8674388237, -2.2929900385  
C, 0, 4.9533430714, 2.3995417513, -1.7581434863  
C, 0, 2.5479351605, 2.355472101, -1.727810017  
C, 0, 0.581684999, -0.760738955, -1.6263726137  
C, 0, 1.3367087425, 0.2926181072, -2.2791227962  
C, 0, 1.3194323031, 1.5743791573, -1.766973531  
C, 0, -0.1582741798, -0.4863360448, -0.4811041862  
C, 0, 0.6412317747, -2.572940665, 0.5509739624  
C, 0, 1.4137151929, -2.8495360349, -0.6457538285  
C, 0, 1.3848198429, -1.9665928278, -1.7064977355  
C, 0, -0.1277347273, -1.4173616804, 0.6373845199  
C, 0, 0.642640124, -1.0622422544, 2.9481074066  
C, 0, 1.4455083574, -2.2667769366, 2.8479640333  
C, 0, 1.4447078203, -3.0028353867, 1.68013734  
C, 0, -0.1269618335, -0.6412171374, 1.8687892715  
C, 0, 0.5842648166, 1.6837045948, 2.2522155574  
C, 0, 1.3879400163, 1.2355189933, 3.3742989635  
C, 0, 1.4165565051, -0.1023334399, 3.7131785546  
C, 0, -0.1571954619, 0.7694551676, 1.5113968662  
C, 0, 0.5465940181, 1.8700363002, -0.574856588  
C, 0, 1.3209914145, 2.816943509, 0.2053912483  
C, 0, 1.3393442246, 2.7261650174, 1.5827060696  
C, 0, -0.1765488275, 0.8651830587, 0.0589902192

**C<sub>70</sub>@dibenzo[a,g]corannulene-2**

C, 0, 10.239452565, 0.8549710597, -2.5859090887

C,0,9.9872463465,2.0548743272,-1.8169843854  
C,0,10.2823222399,2.102261144,-0.3725882312  
C,0,10.9633547412,1.0125498132,0.1177409682  
C,0,11.1839088626,-0.1834658638,-0.6390244808  
C,0,10.6528358877,-1.7394540547,-2.3473819212  
C,0,9.7536692591,2.976394088,0.639856165  
C,0,9.7862461748,2.6446118927,1.9932205028  
C,0,10.3472626774,1.4053909664,2.458946817  
C,0,10.9874473002,0.6716269071,1.4882927574  
C,0,11.2107798071,-0.7397968786,1.5874952661  
C,0,11.3317597725,-1.2540372862,0.274208583  
C,0,11.0656498034,-2.5720570387,-0.0522490522  
C,0,10.8032385403,-2.7938404282,-1.4550195395  
C,0,10.8266025363,-3.4279281115,1.0860570088  
C,0,10.6967159849,-2.9170091037,2.3711030409  
C,0,10.8053878969,-1.503288178,2.6524541831  
C,0,10.3227819008,-0.7388964803,3.8174227348  
C,0,10.1071591267,0.6888197018,3.7250638831  
C,0,10.7577920978,-0.3596825539,-1.9309684356  
H,0,10.621373003,-3.8034923429,-1.8098831863  
H,0,10.6485008705,-4.4869538091,0.9280432295  
H,0,10.4162748434,-3.6019249481,3.1645562531  
H,0,9.276414094,3.3032526855,2.6886152557  
H,0,9.2192214344,3.8759451826,0.352690597  
H,0,10.353148405,-1.9723567143,-3.364033337  
C,0,9.3782493945,3.1451486635,-2.4648031098  
C,0,9.0328157274,3.0960747345,-3.8069353666  
H,0,9.1804047612,4.0472289887,-1.8957217554  
C,0,9.8839854834,0.8431276213,-3.9465155217  
C,0,9.2929382403,1.9397300774,-4.554260048  
H,0,8.5657799635,3.9535211823,-4.2769548059  
H,0,10.0771876855,-0.0513731443,-4.5290533502  
H,0,9.0295788841,1.9007082947,-5.6046725387  
C,0,9.5722233555,1.3579601909,4.8408693916  
C,0,9.2519307482,0.6850372168,6.0097527239  
H,0,9.4097397847,2.4287628732,4.7786711198  
C,0,9.9823658196,-1.3898237681,5.0174677401  
C,0,9.4570635393,-0.6983411635,6.0981281549  
H,0,8.842279231,1.2287063243,6.8528718322  
H,0,10.1410754922,-2.4600858794,5.0947852781  
H,0,9.2064899628,-1.2278444702,7.0097398737  
C,0,2.3038174806,1.2135836375,3.0721078738  
C,0,2.7644670079,2.1610721316,2.0751746201  
C,0,3.1928385726,0.6895894602,4.0052094744  
C,0,4.0891428717,2.549618535,2.0510344916  
C,0,4.779910692,2.6933162225,0.7767540655  
C,0,4.0982590797,2.5335657296,-0.4564856877  
C,0,4.8959136799,2.1563257362,-1.5664249691  
C,0,2.2125274664,-1.5479774526,3.7017473999  
C,0,1.2922619794,-0.9941663465,2.7259779701  
C,0,3.1460187444,-0.7289335632,4.3284964926  
C,0,1.3367370026,0.3509432236,2.4192394724  
C,0,1.1886954725,0.7845347693,1.036877498  
C,0,0.9037921941,-0.1381428831,-0.0008592403  
C,0,1.3049288095,0.2469291784,-1.3048089796  
C,0,2.6846433853,2.1171159173,-0.4304647985

C,0,2.0656053828,1.894576983,0.8254904428  
C,0,2.1815934337,1.3571292479,-1.5163519771  
C,0,4.874998459,-2.4572210499,4.0429006488  
C,0,3.8964197537,-3.3028662643,3.3850817128  
C,0,4.5130039443,-1.1959850594,4.5049767713  
C,0,2.5990394959,-2.8602507614,3.2195261796  
C,0,1.9000485782,-3.1177029202,1.9679300445  
C,0,2.4855942123,-3.9000827622,0.9410729318  
C,0,2.0155267242,-3.655086304,-0.3737927945  
C,0,0.8562162218,-1.574325622,0.3265030115  
C,0,1.0977694492,-1.9729585499,1.6653796556  
C,0,1.2132405024,-2.5103285863,-0.6763921511  
C,0,6.6115688139,-0.2574740128,3.6251631427  
C,0,6.9798694792,-1.5764737109,3.1427739565  
C,0,5.4056756622,-0.0657045184,4.2901807971  
C,0,6.134656303,-2.6487803533,3.3473367785  
C,0,5.9308888063,-3.6245340114,2.2842515948  
C,0,6.6574446893,-3.5571885577,1.0687233318  
C,0,6.0458652459,-4.1620569412,-0.0583840312  
C,0,3.8700624022,-4.373572243,1.1183089314  
C,0,4.5583848426,-4.0264059958,2.3083296868  
C,0,4.6736812576,-4.5641717478,-0.034019736  
C,0,5.0215586784,2.0114809346,3.0240983252  
C,0,6.2800081693,1.803261536,2.3316639814  
C,0,4.5886406614,1.0999001454,3.9817183725  
C,0,7.0478804932,0.6943170446,2.6209577171  
C,0,7.7028380315,-0.0349836472,1.5443320884  
C,0,7.6466588721,0.4180258878,0.2041919345  
C,0,7.8199008087,-0.5714770707,-0.7932641644  
C,0,7.5576146768,-2.4114501431,0.8501372218  
C,0,7.6601832503,-1.4266625806,1.8631564148  
C,0,7.7747222735,-1.9635765193,-0.4754751073  
C,0,6.8250188115,1.6003238687,-0.1081623223  
C,0,6.1236320771,2.234320734,0.9479014735  
C,0,6.2401119689,1.697536877,-1.3951378039  
C,0,6.922740375,-1.699083283,-2.6610325636  
C,0,7.2855988479,-0.395903556,-2.1363072624  
C,0,6.5166581148,0.7113299536,-2.431866951  
C,0,5.7874914986,-1.8420698363,-3.452616137  
C,0,5.1844987954,-3.8988440273,-2.2403499167  
C,0,6.3682163798,-3.7409168934,-1.415658989  
C,0,7.2124053705,-2.6682398646,-1.6186823858  
C,0,4.8950257231,-2.9724340041,-3.2369211922  
C,0,2.5226722701,-2.9895885993,-2.5803831385  
C,0,2.8340866912,-3.952623315,-1.5410887986  
C,0,4.1310200852,-4.395656291,-1.3751228817  
C,0,3.5279761374,-2.5049735577,-3.4108832291  
C,0,2.6143632226,-0.228214811,-3.2097439357  
C,0,1.5721437401,-0.7414321243,-2.3403444513  
C,0,1.5271205245,-2.0866502138,-2.0339910823  
C,0,3.575182115,-1.0864495096,-3.734262815  
C,0,5.3335450939,0.5698613187,-3.2593048188  
C,0,4.3248183628,1.4573248086,-2.7093577223  
C,0,3.0003631178,1.0685225105,-2.6857321143  
C,0,4.9715355385,-0.6765961855,-3.7607748032

## C<sub>70</sub>@2dibenzo[a,g]corannulene-1

C, 0, 10.2919355464, 0.4695734322, -2.5529806726  
C, 0, 10.177975355, 1.7757624939, -1.9420572206  
C, 0, 10.5215395585, 1.9746582929, -0.5225864411  
C, 0, 11.1353890356, 0.9038790749, 0.0839606391  
C, 0, 11.2557196833, -0.3869363686, -0.526509095  
C, 0, 10.5534284823, -2.0980702528, -2.0120657242  
C, 0, 10.0743404439, 2.9966577014, 0.3849292228  
C, 0, 10.1105153286, 2.8231548452, 1.7665107359  
C, 0, 10.5972528801, 1.6115155204, 2.3690645927  
C, 0, 11.1720937897, 0.7278130091, 1.4859415193  
C, 0, 11.315358741, -0.6730139886, 1.7514841625  
C, 0, 11.370787605, -1.3484933506, 0.5074638726  
C, 0, 11.0101134478, -2.6750859994, 0.3503113155  
C, 0, 10.6773766722, -3.0457082327, -1.0052407612  
C, 0, 10.7452725864, -3.3713163865, 1.5875332425  
C, 0, 10.6795007186, -2.7026752534, 2.8023050793  
C, 0, 10.8850785862, -1.2753149742, 2.9068875492  
C, 0, 10.4628382102, -0.3500584951, 3.9736395432  
C, 0, 10.3260045634, 1.0658185171, 3.7111269235  
C, 0, 10.7625857971, -0.6878317584, -1.7711561854  
H, 0, 10.4179990897, -4.0762565438, -1.2263595418  
H, 0, 10.4909690872, -4.4262016073, 1.5602066313  
H, 0, 10.3708441613, -3.2655887692, 3.6768372452  
H, 0, 9.6557492743, 3.5894813062, 2.3854158924  
H, 0, 9.5932585385, 3.8891918128, -0.0011474342  
H, 0, 10.196476481, -2.4294127389, -2.9814699335  
C, 0, 9.6409986649, 2.826905357, -2.7071984995  
C, 0, 9.2288498417, 2.6381706892, -4.0171428997  
H, 0, 9.554148597, 3.8096364717, -2.2563169945  
C, 0, 9.8587676237, 0.3130814311, -3.8823163333  
C, 0, 9.3380329664, 1.3726676718, -4.6085623709  
H, 0, 8.8219752933, 3.4687747246, -4.5817767911  
H, 0, 9.9415268593, -0.6632281912, -4.3475743886  
H, 0, 9.0157487676, 1.2212175642, -5.6320019653  
C, 0, 9.8359809435, 1.8918036737, 4.738897163  
C, 0, 9.490668139, 1.3825747008, 5.9810266951  
H, 0, 9.7323731618, 2.9548890696, 4.5499202705  
C, 0, 10.0977423213, -0.8329730227, 5.2435827274  
C, 0, 9.6219908612, 0.0109097109, 6.2349669898  
H, 0, 9.1188130344, 2.0452513549, 6.7535838936  
H, 0, 10.19804599, -1.8934154813, 5.4482665067  
H, 0, 9.3518999125, -0.3908155467, 7.20445157  
C, 0, 7.1525655079, -0.9978550691, -1.6519837682  
C, 0, 6.4594695312, -2.2655210928, -1.7823272664  
C, 0, 7.8961324875, -0.725490723, -0.509319102  
C, 0, 6.5446567399, -3.2085901246, -0.7757905289  
C, 0, 5.3593231475, -3.9585290662, -0.384283407  
C, 0, 4.1310429943, -3.8161924939, -1.0777523118  
C, 0, 2.9601982362, -4.131500493, -0.3432220668  
C, 0, 6.9872984832, 1.560540892, -0.4424450206  
C, 0, 6.2081286532, 1.2671343284, -1.6303602289  
C, 0, 7.8100999714, 0.5867258519, 0.1114232594  
C, 0, 6.2883312673, 0.020122589, -2.2196059608  
C, 0, 5.0797755122, -0.625648286, -2.7136514224

C,0,3.8256515351,0.0357347414,-2.6948214419  
C,0,2.6794317908,-0.7987074849,-2.6725691347  
C,0,4.0401492038,-2.8103990317,-2.1515613394  
C,0,5.1850608387,-2.0277059437,-2.4460215728  
C,0,2.7854735448,-2.2007105126,-2.4049520924  
C,0,7.0609332424,1.2071860121,2.371289263  
C,0,6.1970932337,2.2148801629,1.7872066224  
C,0,7.8478110323,0.4057698665,1.5523596421  
C,0,6.1612143896,2.3870539631,0.4162053674  
C,0,4.8875917704,2.6155158342,-0.2520479595  
C,0,3.6834302567,2.7624165057,0.4816859529  
C,0,2.488508507,2.4425476294,-0.2109876019  
C,0,3.7404831492,1.366252538,-2.0661992532  
C,0,4.9160859355,1.9281959994,-1.5071883711  
C,0,2.5161636129,1.755167362,-1.4661133979  
C,0,7.2717128917,-1.5696263318,2.9009773485  
C,0,6.4444536104,-0.7290855141,3.7462613005  
C,0,7.957205548,-1.0185552739,1.8243259335  
C,0,6.3420822947,0.6243131553,3.4883600448  
C,0,5.0497128608,1.2869417965,3.5990529196  
C,0,3.9008447515,0.5967033343,4.0616413745  
C,0,2.6497909899,1.1139127451,3.6401275839  
C,0,3.7217030304,2.5787525332,1.9441815829  
C,0,4.9610729739,2.2628922608,2.5558554339  
C,0,2.5619899599,2.0899236801,2.5969158692  
C,0,7.3278207823,-2.9343016323,0.4141883309  
C,0,6.6052115354,-3.4991849295,1.5381870505  
C,0,7.986359389,-1.7173691903,0.5497802377  
C,0,6.5780654178,-2.8346447715,2.749550211  
C,0,5.3410862897,-2.7764482623,3.5161394936  
C,0,4.1774942397,-3.4694964932,3.0967645842  
C,0,2.94149929,-2.9494531104,3.5572089099  
C,0,4.0096630422,-0.847307875,4.3367547424  
C,0,5.2587895524,-1.4847101152,4.1269712695  
C,0,2.8584463448,-1.6577696015,4.1680537268  
C,0,4.2064698443,-4.1781545683,1.804513876  
C,0,5.3964668713,-4.1367764843,1.0350817846  
C,0,2.9973420111,-4.3097478386,1.0761430292  
C,0,0.8379489927,-2.0334863286,3.0110920166  
C,0,1.7002788744,-3.1863223944,2.8330343639  
C,0,1.7274908823,-3.8508574479,1.621669721  
C,0,0.0442635726,-1.589060233,1.9597563346  
C,0,0.6301790924,0.743542626,2.4813511526  
C,0,1.4627949968,0.2725272293,3.5718690404  
C,0,1.5644087522,-1.080925828,3.8297843141  
C,0,-0.0610544637,-0.1644411806,1.6877197993  
C,0,0.5565443532,1.0968986101,-0.3323822273  
C,0,1.2843090393,2.0354403331,0.499673849  
C,0,1.3201877164,1.8632661608,1.8706749891  
C,0,-0.0987636156,0.0165153719,0.2467837033  
C,0,0.7188010501,-1.4617140918,-1.5418688916  
C,0,1.408285976,-0.3317173713,-2.1360832041  
C,0,1.3288407607,0.9153491319,-1.5468504822  
C,0,-0.0168063927,-1.2959951983,-0.373889111  
C,0,0.8935002617,-3.3982019777,0.5243123025  
C,0,1.6669356254,-3.5602624856,-0.6923078698

C, 0, 1.5816828408, -2.617198116, -1.6988431202  
C, 0, 0.0722541652, -2.2879575729, 0.6852309555  
C, 0, -2.4566392464, -1.2815608034, 4.1948290953  
C, 0, -2.5332755226, 0.1386619913, 3.9313154588  
C, 0, -2.9255288343, 0.6365542451, 2.6006260856  
C, 0, -3.3974495612, -0.3225944652, 1.7354078023  
C, 0, -3.3292292148, -1.7288379208, 2.0022052319  
C, 0, -2.3734566861, -3.6437717063, 3.0257256261  
C, 0, -2.6383806486, 1.9039985574, 1.9848468886  
C, 0, -2.6745404656, 2.0775329945, 0.6032685152  
C, 0, -3.0012117022, 0.9997617933, -0.2910181169  
C, 0, -3.4341440622, -0.1464980327, 0.3334309241  
C, 0, -3.3888518961, -1.4427094251, -0.2757817719  
C, 0, -3.3295614273, -2.4083100373, 0.7591253095  
C, 0, -2.787946276, -3.6698499876, 0.5864929229  
C, 0, -2.3840066412, -4.3178898761, 1.8122462333  
C, 0, -2.4518739258, -3.9922262271, -0.7805204626  
C, 0, -2.4994683453, -3.0390630743, -1.7886334084  
C, 0, -2.9003578663, -1.6728091787, -1.5372458153  
C, 0, -2.6274512688, -0.46178082, -2.3317772406  
C, 0, -2.681233275, 0.8487337392, -1.721856134  
C, 0, -2.7779214634, -2.2603976888, 3.1407872259  
H, 0, -1.9821285423, -5.3254634281, 1.7736589177  
H, 0, -2.0550779896, -4.9754630637, -1.0128955444  
H, 0, -2.1319245332, -3.3181537716, -2.7704515201  
H, 0, -2.3398537664, 3.0288884832, 0.2032440254  
H, 0, -2.2773909054, 2.7291230922, 2.5897996778  
H, 0, -1.9576426992, -4.1544671844, 3.8878367298  
C, 0, -2.1320369875, 1.0288783364, 4.9438409942  
C, 0, -1.6751616605, 0.5774545352, 6.1722235887  
H, 0, -2.1884408662, 2.0953709298, 4.7540791596  
C, 0, -1.9830248896, -1.7040372807, 5.4504001196  
C, 0, -1.599709022, -0.7982430266, 6.4270920131  
H, 0, -1.3760762766, 1.2884850288, 6.9333048969  
H, 0, -1.9231987446, -2.7674019904, 5.655755584  
H, 0, -1.2419380307, -1.1547250531, 7.3858167463  
C, 0, -2.326920463, 1.9641500843, -2.5022370068  
C, 0, -1.9368310957, 1.8332811189, -3.825923286  
H, 0, -2.3665837769, 2.950272976, -2.05214152  
C, 0, -2.221856593, -0.5577734924, -3.6754793791  
C, 0, -1.8834939773, 0.5637647963, -4.4164138225  
H, 0, -1.6727433975, 2.7122701654, -4.4020285776  
H, 0, -2.1795574019, -1.5369897285, -4.1400663547  
H, 0, -1.577874589, 0.457604757, -5.4506090134

### **C<sub>70</sub>@2dibenzo[a,g]corannulene-2**

C, 0, 10.5115128505, 1.4135129542, -2.3901498432  
C, 0, 10.24116652, 2.4837091405, -1.4542646095  
C, 0, 10.5277306805, 2.3200321643, -0.0166233832  
C, 0, 11.2178862819, 1.1767041101, 0.312396381  
C, 0, 11.4558258206, 0.1079817328, -0.6112527371  
C, 0, 10.9514595959, -1.182969668, -2.5350033328  
C, 0, 9.9832849058, 3.0292428489, 1.1098411512  
C, 0, 10.01161083, 2.5013853828, 2.399484867  
C, 0, 10.5840112615, 1.2129275355, 2.6812677419



C,0,11.2378232281,0.6370251936,1.6176505677  
C,0,11.4751703427,-0.7714456807,1.5086107567  
C,0,11.6090755751,-1.084534709,0.1346667016  
C,0,11.3581538152,-2.3420405408,-0.3853008138  
C,0,11.1070995709,-2.3562981927,-1.807349391  
C,0,11.1203176525,-3.3590697037,0.6118284579  
C,0,10.9775657163,-3.0452531101,1.9572842781  
C,0,11.0707064403,-1.6878861848,2.4455618869  
C,0,10.573592359,-1.1089148071,3.7071948587  
C,0,10.3442834719,0.3146698346,3.8257581844  
C,0,11.0394009627,0.1207414798,-1.918217696  
H,0,10.9366035295,-3.3038183298,-2.3088671739  
H,0,10.9526209263,-4.3843207173,0.2972367861  
H,0,10.697797484,-3.8423327947,2.6382520995  
H,0,9.4896705765,3.0443295083,3.1805345623  
H,0,9.4394440936,3.9552231807,0.9546063829  
H,0,10.659989904,-1.2657511639,-3.577035167  
C,0,9.6227842057,3.6509876117,-1.9383299535  
C,0,9.2851800161,3.7968775496,-3.2754469735  
H,0,9.4105717655,4.4565523538,-1.2435132539  
C,0,10.1636052171,1.5988475894,-3.7400720028  
C,0,9.5630224291,2.7666436425,-4.1834678844  
H,0,8.8097438677,4.7088508883,-3.6168500609  
H,0,10.3696760014,0.8019297445,-4.4466376527  
H,0,9.3051321794,2.8800851918,-5.2298361477  
C,0,9.7963286892,0.8061311436,5.0245091911  
C,0,9.476041638,-0.0353891368,6.0784523952  
H,0,9.622866203,1.8727243951,5.1201189612  
C,0,10.2325749324,-1.9335362543,4.7950340749  
C,0,9.6942381665,-1.4146521024,5.9623769832  
H,0,9.0555354327,0.373625937,6.9895750077  
H,0,10.4008553137,-3.0020402682,4.7138140915  
H,0,9.4430047361,-2.0758111809,6.7833420197  
C,0,2.5447216946,0.8167437722,3.2330473328  
C,0,2.9925550678,1.9180826953,2.4012885638  
C,0,3.4376467697,0.1626239619,4.0751358035  
C,0,4.3122647506,2.3225841582,2.4435384936  
C,0,5.0021295196,2.6742515255,1.2095025383  
C,0,4.3237330228,2.7042299514,-0.0359728627  
C,0,5.127542582,2.5169703978,-1.1893165462  
C,0,2.4891115372,-2.0128911138,3.414082054  
C,0,1.5687044638,-1.3222234966,2.5314302846  
C,0,3.409159184,-1.29128803,4.1679629987  
C,0,1.5978771535,0.0532735519,2.4431575035  
C,0,1.4452604247,0.6973855506,1.148996438  
C,0,1.1745507954,-0.0520992443,-0.0207817494  
C,0,1.5671669717,0.5423588108,-1.2457140273  
C,0,2.91498744,2.2721719655,-0.0810137257  
C,0,2.2982048439,1.8455986162,1.122061721  
C,0,2.4230172508,1.6866084823,-1.2766022886  
C,0,5.1616145604,-2.9302273668,3.6154261949  
C,0,4.1955287705,-3.6748248569,2.8292854168  
C,0,4.7822456077,-1.7626175309,4.2709946182  
C,0,2.8919648154,-3.2287535187,2.7313752325  
C,0,2.1963184252,-3.2957683629,1.4528792541  
C,0,2.7940769292,-3.8961091909,0.3163191046

C,0,2.3230315069,-3.4502380338,-0.9460452998  
C,0,1.1424194687,-1.5199180857,0.0735260899  
C,0,1.3849513674,-2.1228989806,1.3312617279  
C,0,1.5132484537,-2.2795388934,-1.0641646449  
C,0,6.8692068565,-0.6691434666,3.5576297413  
C,0,7.2557347446,-1.8898440298,2.8732072289  
C,0,5.659909585,-0.6009262696,4.2410078659  
C,0,6.4242918436,-2.9918013402,2.9017764106  
C,0,6.235340464,-3.7892973049,1.6968645228  
C,0,6.9618442537,-3.5197990815,0.5098240061  
C,0,6.359831295,-3.945900125,-0.7013424453  
C,0,4.1855716047,-4.3714854954,0.420162515  
C,0,4.8681528798,-4.2083463564,1.6526483134  
C,0,4.9934106263,-4.3647878253,-0.7456914393  
C,0,5.2504719253,1.6470523131,3.3207781584  
C,0,6.5119020253,1.5669222473,2.6075661364  
C,0,4.828337953,0.588489277,4.1198699296  
C,0,7.2941227661,0.4356545952,2.7194097019  
C,0,7.9595516822,-0.1046736428,1.5425604747  
C,0,7.8990594285,0.5547930059,0.2913241332  
C,0,8.0864054206,-0.261222808,-0.8502172804  
C,0,7.8467503247,-2.3421948809,0.478901635  
C,0,7.9353469106,-1.5298900806,1.6359209544  
C,0,8.0592195753,-1.6863949503,-0.7579530998  
C,0,7.0623190281,1.761366521,0.1683656449  
C,0,6.3519124916,2.210893398,1.3095896099  
C,0,6.4775951737,2.0543462225,-1.0887807979  
C,0,7.2069315058,-1.0888616104,-2.8765038232  
C,0,7.5517758372,0.1188762229,-2.150181072  
C,0,6.7680714209,1.2488273569,-2.2680129738  
C,0,6.0742848929,-1.1189756245,-3.6846238099  
C,0,5.4979347888,-3.3502890466,-2.8169369398  
C,0,6.6779587447,-3.3097382267,-1.9732559283  
C,0,7.5080434367,-2.2074276571,-2.0006840539  
C,0,5.1971808382,-2.2807963055,-3.6546939582  
C,0,2.8243290973,-2.4335033773,-3.0179194711  
C,0,3.1480743077,-3.5459503706,-2.1431820898  
C,0,4.4503042145,-3.9930951788,-2.0457965572  
C,0,3.823990901,-1.8098634323,-3.7575167402  
C,0,2.8792581424,0.3943221198,-3.1998310034  
C,0,1.843038916,-0.2641593549,-2.4261161108  
C,0,1.8164483767,-1.6417861421,-2.3373224861  
C,0,3.8524763513,-0.3568067003,-3.8509352145  
C,0,5.5881212082,1.2256096073,-3.1116782203  
C,0,4.5671904306,2.0017129855,-2.4315960575  
C,0,3.2481925855,1.5963615159,-2.4740616113  
C,0,5.2433262744,0.0699962105,-3.8065079454  
C,0,-1.0090475414,0.334340292,4.2093086426  
C,0,-1.0889053928,1.5124029035,3.3711915447  
C,0,-1.5792029003,1.4194764974,1.9835424752  
C,0,-2.104401341,0.197614061,1.6353560339  
C,0,-2.0193978046,-0.9672052777,2.4647442367  
C,0,-1.0161203093,-2.3024722439,4.1461206664  
C,0,-1.3571820541,2.307097665,0.873199203  
C,0,-1.5002651422,1.887362658,-0.4478168447  
C,0,-1.8735662374,0.5392823107,-0.7811318944

C, 0, -2.2447176076, -0.2295470706, 0.2965059361  
C, 0, -2.2391010902, -1.6621110398, 0.2880866881  
C, 0, -2.1024654552, -2.1048171491, 1.6257690734  
C, 0, -1.567802762, -3.3348328748, 1.965668922  
C, 0, -1.0939806359, -3.4211907599, 3.3266918903  
C, 0, -1.3193834532, -4.2066756302, 0.8409785684  
C, 0, -1.4500911543, -3.7658991231, -0.4694219498  
C, 0, -1.8478709431, -2.4134892907, -0.7901565601  
C, 0, -1.6548528481, -1.6550068348, -2.0392610184  
C, 0, -1.6686066104, -0.208242268, -2.0354140921  
C, 0, -1.4074144079, -0.9866116187, 3.6916953414  
H, 0, -0.6952565796, -4.3619871749, 3.6931938664  
H, 0, -0.9296547004, -5.2043129509, 1.0170081256  
H, 0, -1.1495503438, -4.4397617805, -1.2648476374  
H, 0, -1.2143071513, 2.5794729559, -1.2329721864  
H, 0, -0.9684650183, 3.3048478949, 1.0474154436  
H, 0, -0.553825946, -2.4186799704, 5.1207246636  
C, 0, -0.5830628631, 2.7247821558, 3.8739487392  
C, 0, -0.0191286999, 2.8116062716, 5.1374909476  
H, 0, -0.637193481, 3.6115964615, 3.2516696824  
C, 0, -0.4316866972, 0.4599975292, 5.4857332901  
C, 0, 0.0562448935, 1.6718945013, 5.9491676011  
H, 0, 0.3639997096, 3.760029442, 5.4952689105  
H, 0, -0.3674702097, -0.4182343513, 6.1191147052  
H, 0, 0.4977336237, 1.7360747626, 6.9367127699  
C, 0, -1.3934481717, 0.4652478838, -3.2398869768  
C, 0, -1.1211126605, -0.2205712122, -4.4137589342  
H, 0, -1.4002698614, 1.5500969688, -3.2443016957  
C, 0, -1.3698290761, -2.3177602581, -3.2476079712  
C, 0, -1.1102079334, -1.6214975893, -4.4179433744  
H, 0, -0.9153448289, 0.327572615, -5.3256433509  
H, 0, -1.3588142386, -3.4025072491, -3.2580164554  
H, 0, -0.8964281502, -2.1610781089, -5.3330489758

### **C<sub>60</sub>@dibenzo[a,g]corannulene+4ethyl**

C, 0, -0.2108939019, 0.495827636, 3.3772115883  
C, 0, 1.1727265836, 0.6172870233, 2.9845326982  
C, 0, 1.5364907403, 0.9806583914, 1.6032380715  
C, 0, 0.4798754286, 1.3380216731, 0.7960906398  
C, 0, -0.8936402479, 1.2271808372, 1.1928325208  
C, 0, -2.6588959062, 0.2545974741, 2.449539117  
C, 0, 2.7663109279, 0.7371162473, 0.8992779639  
C, 0, 2.8172593261, 0.666939699, -0.490349815  
C, 0, 1.6427713308, 0.8333875426, -1.3042154326  
C, 0, 0.5321520179, 1.2651424753, -0.6154267488  
C, 0, -0.8086382862, 1.1129997713, -1.0993379742  
C, 0, -1.6775451001, 1.0991919187, 0.0196524979  
C, 0, -2.919107404, 0.486067032, 0.0022794612  
C, 0, -3.4368542894, 0.1455746793, 1.3059891081  
C, 0, -3.3446515035, 0.0328427891, -1.2999380249  
C, 0, -2.4867486988, 0.0421412038, -2.3911349954  
C, 0, -1.1236616376, 0.5136189676, -2.293362214  
C, 0, 0.0270294546, 0.1889391022, -3.1522387396  
C, 0, 1.3793450603, 0.3388060322, -2.668203601  
C, 0, -1.2945249843, 0.7309026678, 2.4087561453

H, 0, -4.4221561195, -0.3028083681, 1.3867907318  
H, 0, -4.3254532177, -0.418845648, -1.4122497883  
H, 0, -2.833652397, -0.4093267805, -3.3145728827  
H, 0, 3.7553533627, 0.3707486981, -0.9480195368  
H, 0, 3.667084349, 0.4905402617, 1.4516755884  
H, 0, -3.0690418506, -0.1190188049, 3.3817387623  
C, 0, 2.1510842186, 0.2189358553, 3.9081316688  
C, 0, 1.8523846508, -0.3067911427, 5.1614982043  
H, 0, 3.1965483437, 0.2939035098, 3.6196139304  
C, 0, -0.488927138, 0.0116923795, 4.6649088942  
C, 0, 0.4966581836, -0.3962853933, 5.5580406037  
H, 0, -1.5269995644, -0.072275507, 4.9744529586  
C, 0, 2.4195546318, -0.145316145, -3.4768372789  
C, 0, 2.2095644767, -0.7628736059, -4.7067634622  
H, 0, 3.442152934, -0.0466942093, -3.1207032677  
C, 0, -0.1602049459, -0.4071010962, -4.4087282185  
C, 0, 0.8854446433, -0.8821855648, -5.1939037343  
H, 0, -1.1732369679, -0.5114959735, -4.7870248019  
C, 0, 2.9963060894, -0.825145451, 6.0085869897  
H, 0, 3.7673245242, -0.0493969386, 6.0897387769  
H, 0, 2.6614505791, -1.0392407675, 7.026838154  
C, 0, 3.6205951122, -2.0931434069, 5.3982470452  
H, 0, 4.014624622, -1.8888819895, 4.3975257542  
H, 0, 4.4390303004, -2.4680648198, 6.0192217162  
H, 0, 2.8715363129, -2.8854927045, 5.2981458928  
C, 0, 0.0747962126, -0.9839754867, 6.8870275378  
H, 0, 0.7285206058, -0.633478685, 7.6924782252  
H, 0, -0.9304065901, -0.6214467047, 7.1277516549  
C, 0, 0.0609158932, -2.5213490232, 6.856652837  
H, 0, -0.269526808, -2.932393079, 7.8147959349  
H, 0, -0.6169860626, -2.878149095, 6.0738810894  
H, 0, 1.0567113028, -2.9197920161, 6.6372488268  
C, 0, 3.4098398975, -1.3164829757, -5.4477539203  
H, 0, 4.1843415688, -0.5420923889, -5.5050845803  
H, 0, 3.1463126405, -1.568621304, -6.4783586723  
C, 0, 3.9947477629, -2.5576945168, -4.7514823433  
H, 0, 4.8586423605, -2.944504409, -5.2993867314  
H, 0, 4.3137274219, -2.3165370132, -3.7325419826  
H, 0, 3.2467175117, -3.3536873681, -4.6763539034  
C, 0, 0.5649141029, -1.5401248875, -6.5189482246  
H, 0, 1.2529842927, -1.1911991403, -7.2967229855  
H, 0, -0.4359428971, -1.2240202285, -6.8321187301  
C, 0, 0.6041971341, -3.0749760753, -6.4414128788  
H, 0, 0.3465460876, -3.5230486059, -7.405282094  
H, 0, 1.5982869656, -3.4309132781, -6.1544852959  
H, 0, -0.1060925447, -3.4346848611, -5.6908039405  
C, 0, 1.6495227388, -6.4607034134, 3.5524021754  
C, 0, 0.2172798113, -6.5347266899, 3.8105811097  
C, 0, -0.5512764594, -7.5094555067, 3.1869533654  
C, 0, 0.0745187663, -8.4570942146, 2.2743554542  
C, 0, 1.4397258697, -8.3864811784, 2.0281192713  
C, 0, 2.2460315783, -7.3646981034, 2.6825176907  
C, 0, 2.0287883472, -5.0547909556, 3.51597832  
C, 0, 0.830095325, -4.2599213413, 3.7508002416  
C, 0, -0.2894342706, -5.1746934675, 3.9343537676  
C, 0, -1.5418006583, -4.8509132053, 3.4255488758

C, 0, -1.8636825073, -7.1702864477, 2.6535127205  
C, 0, -0.8514714593, -8.7038908704, 1.1770857741  
C, 0, -0.369304441, -8.8691356462, -0.115107851  
C, 0, 1.0624616146, -8.7950527187, -0.3732719017  
C, 0, 1.9452578099, -8.5595112449, 0.6728525389  
C, 0, 3.0639477624, -7.6444238725, 0.4896093016  
C, 0, 3.2495675977, -6.9059452006, 1.7315822527  
C, 0, 3.6107405857, -5.5649203523, 1.6952100194  
C, 0, 2.9866454569, -4.6165955396, 2.6088869127  
C, 0, 0.6448806879, -3.0628937564, 3.070130082  
C, 0, 1.6482955065, -2.6079437842, 2.1160661586  
C, 0, 2.7939791764, -3.3618777057, 1.8934593469  
C, 0, 3.2987112141, -3.5363048122, 0.5361353845  
C, 0, 3.803939785, -4.8971138812, 0.4147363574  
C, 0, 3.6266308467, -5.601765291, -0.7700710551  
C, 0, 3.2475456785, -7.0076622849, -0.7311350067  
C, 0, 2.3219417244, -7.2551625, -1.8290512016  
C, 0, 1.255225083, -8.1275028083, -1.6538525699  
C, 0, -2.04931329, -7.9087595867, 1.4115822344  
C, 0, -1.4405810915, -5.7985548733, -2.6365527793  
C, 0, -2.3981021451, -6.2358014329, -1.7294308501  
C, 0, -3.0249482511, -5.2883888745, -0.8167456703  
C, 0, -2.665196375, -3.9469868369, -0.8534664494  
C, 0, -1.6600284576, -3.4893372784, -1.8053091093  
C, 0, 0.3697731004, -4.3177939406, -2.9369600763  
C, 0, 0.8768184702, -5.6791087096, -3.0565995029  
C, 0, -0.2422485467, -6.5936185582, -2.8705907204  
C, 0, -0.0574133857, -7.7888817771, -2.1869341463  
C, 0, -1.0613441597, -8.2471106152, -1.2359417596  
C, 0, -2.2032342718, -7.4884950643, -1.0123545775  
C, 0, -3.2168206055, -5.9553260406, 0.4640326911  
C, 0, -3.0393889135, -5.2503865102, 1.6485375216  
C, 0, -2.6646829523, -3.8430557581, 1.6116018707  
C, 0, -2.4801540828, -3.2081713898, 0.3893276187  
C, 0, -1.3577637336, -2.2981692787, 0.2058741004  
C, 0, -0.8523770849, -2.4735658676, -1.1470604472  
C, 0, 0.5111113908, -2.4066433749, -1.393179037  
C, 0, 1.1389304812, -3.3436110039, -2.3129985985  
C, 0, 2.1289591406, -6.0023277566, -2.5472659175  
C, 0, 2.9358470671, -4.9807081931, -1.8920111605  
C, 0, 2.4511023233, -3.6840506352, -1.7757475686  
C, 0, 2.6365316793, -2.9459313349, -0.533469376  
C, 0, 1.4331810404, -2.1617649539, -0.2970972719  
C, 0, 0.9526440644, -1.9950428987, 0.992869831  
C, 0, -0.4760416359, -2.0654129477, 1.2513975016  
C, 0, -0.6690862774, -2.7272336299, 2.5348887685  
C, 0, -1.7385973126, -3.5952253818, 2.7115540538  
C, 0, -2.7090619688, -7.3153111493, 0.3429993716  
C, 0, -2.3467744598, -5.8727869062, 2.769381884  
C, 0, -1.0635176593, -4.3916719767, -2.6782517631

### **C<sub>60</sub>@dibenzo[a,g]corannulene+8ethyl**

C, 0, -0.3619274782, -0.5757500493, 3.3194384469  
C, 0, 1.0498042471, -0.5776725705, 2.9777861797

C,0,1.5188781177,-0.1803314159,1.6450824504  
C,0,0.5414068775,0.3157257654,0.8234047934  
C,0,-0.8462432093,0.3367232562,1.1554947085  
C,0,-2.8543189984,-0.1607334511,2.3105718152  
C,0,2.7531516393,-0.5009630085,0.9786098259  
C,0,2.8698173295,-0.464130667,-0.4072375439  
C,0,1.7610859701,-0.1076550454,-1.2527451839  
C,0,0.6578847931,0.3447123461,-0.5801624294  
C,0,-0.6571547828,0.3742352052,-1.1340964271  
C,0,-1.5729394765,0.411600562,-0.0595947246  
C,0,-2.9180768461,0.143280645,-0.1738093053  
C,0,-3.5937003131,0.0625637372,1.1311267743  
C,0,-3.3567828892,-0.0980076679,-1.5475310758  
C,0,-2.4371933786,-0.1307959287,-2.6214490537  
C,0,-0.9927466044,-0.0060739333,-2.4092878  
C,0,0.1856294577,-0.4130523391,-3.236843877  
C,0,1.5202534722,-0.4385554859,-2.6634075897  
C,0,-1.3853094725,-0.1248846886,2.3303311751  
H,0,3.7981416028,-0.8149816684,-0.8450546447  
H,0,3.5966080464,-0.878481093,1.5467097376  
C,0,1.9703294,-1.105815586,3.8948376898  
C,0,1.6109583872,-1.6841229229,5.1051538417  
H,0,3.0239730701,-1.0854613323,3.6287536915  
C,0,-0.6842179738,-1.13241031,4.5734422475  
C,0,0.2419891835,-1.6987023282,5.44694943  
H,0,-1.7133558726,-1.1661664865,4.8911168551  
C,0,2.5833378897,-0.9309029041,-3.4346785981  
C,0,2.4357854062,-1.4516573605,-4.7135457396  
H,0,3.5771441376,-0.9257305461,-2.9946597725  
C,0,0.0787926322,-0.9300424913,-4.5438013737  
C,0,1.1419765332,-1.4556468198,-5.2758816038  
H,0,-0.8841808186,-0.9675758389,-5.0252363855  
C,0,2.7006269662,-2.2952244788,5.9626683952  
H,0,3.4815466131,-1.5428108157,6.1287396948  
H,0,2.3142329429,-2.5636811054,6.9495351818  
C,0,3.3345827152,-3.5363046742,5.3099319945  
H,0,3.7068487196,-3.3029595236,4.3065303926  
H,0,4.1712135168,-3.9083837317,5.9079154761  
H,0,2.6012928123,-4.3406325865,5.2056865045  
C,0,-0.2720906068,-2.3913117995,6.6897315721  
H,0,0.3551345775,-2.1611723253,7.557368528  
H,0,-1.2725691837,-2.0099789885,6.9214699117  
C,0,-0.3468095439,-3.9144958675,6.4863159743  
H,0,-0.7382288421,-4.4168962612,7.3754252386  
H,0,-1.0012745888,-4.1485729641,5.6392452117  
H,0,0.6422462459,-4.3285125456,6.265015745  
C,0,3.6592387115,-2.0129583714,-5.4099242891  
H,0,4.4432759935,-1.2455630821,-5.4159942669  
H,0,3.4399192296,-2.2393504021,-6.4567771259  
C,0,4.2039965414,-3.2762672203,-4.7207252684  
H,0,5.1292519812,-3.6121735611,-5.1972356077  
H,0,4.4127642755,-3.0858090638,-3.6624995134  
H,0,3.4768335787,-4.0914811393,-4.7665858205  
C,0,0.8489619384,-2.0875993434,-6.6190549307  
H,0,1.6035362886,-1.801781627,-7.3595865831  
H,0,-0.1081659224,-1.7051084461,-6.9904289634

C, 0, 0.7725470945, -3.6203090521, -6.5137364438  
H, 0, 0.5509920322, -4.0754190578, -7.4832678591  
H, 0, 1.7172534922, -4.0355327005, -6.147770734  
H, 0, -0.0128487788, -3.9088066264, -5.8071800523  
C, 0, -2.9508147151, -0.2858642382, -4.0445380133  
H, 0, -2.2593945915, 0.237021075, -4.7091514231  
H, 0, -3.8959847764, 0.2513871398, -4.1577197021  
C, 0, -4.7974235752, -0.5188785722, -1.790277958  
H, 0, -5.0897126715, -0.3557209263, -2.8289624009  
H, 0, -5.4853428024, 0.0807244531, -1.1937942266  
C, 0, -5.063101324, 0.4838415303, 1.2439155539  
H, 0, -5.2973665937, 1.0899253234, 0.3659140325  
H, 0, -5.1269481144, 1.1870261884, 2.0826724867  
C, 0, -6.1613639289, -0.5739556832, 1.4335559667  
H, 0, -6.0293081472, -1.1296923683, 2.364703793  
H, 0, -7.1386906455, -0.082700339, 1.4764004341  
H, 0, -6.1855001288, -1.2955045398, 0.6169719778  
C, 0, -5.0054629041, -2.0071607177, -1.4520921322  
H, 0, -6.066224511, -2.2755478053, -1.490799616  
H, 0, -4.4655113587, -2.6401184731, -2.157897267  
H, 0, -4.6238779431, -2.2371724739, -0.4509213227  
C, 0, -3.1407956, -1.7444775552, -4.5056546053  
H, 0, -3.176072657, -1.8111657422, -5.5983465205  
H, 0, -2.3227937026, -2.3820818499, -4.1516118504  
H, 0, -4.0749536368, -2.1578546399, -4.1179645456  
C, 0, -3.6186036394, -0.4610347365, 3.5856425645  
H, 0, -3.1084241223, -0.0251099409, 4.4482014582  
H, 0, -4.6028386161, 0.010467331, 3.5658135502  
C, 0, -3.8102414392, -1.9806730144, 3.766577055  
H, 0, -4.3453676322, -2.2064747442, 4.6947527216  
H, 0, -4.3803071803, -2.3884125293, 2.9259751916  
H, 0, -2.8510306616, -2.5069700779, 3.7853217589  
C, 0, 2.012252017, -7.4875439907, 2.4974350008  
C, 0, 0.695893263, -7.7394043387, 3.0693528875  
C, 0, -0.1193992145, -8.724799891, 2.5271669568  
C, 0, 0.3416647841, -9.5062318592, 1.3872636849  
C, 0, 1.5966608914, -9.2662413824, 0.8424353686  
C, 0, 2.4518953638, -8.2332185094, 1.4107338019  
C, 0, 2.2564452078, -6.0523735641, 2.5438432816  
C, 0, 1.0893907832, -5.4170464322, 3.1428956407  
C, 0, 0.1259232809, -6.459664727, 3.4697128106  
C, 0, -1.2338812217, -6.2237858527, 3.3057487721  
C, 0, -1.5449128329, -8.4778566238, 2.3565815667  
C, 0, -0.7987316628, -9.7429114818, 0.5125166194  
C, 0, -0.6311736678, -9.7285772846, -0.8664003944  
C, 0, 0.6850223594, -9.4770920806, -1.4378520813  
C, 0, 1.7723489061, -9.2510839641, -0.6037156197  
C, 0, 2.7360921737, -8.2086152002, -0.9296079708  
C, 0, 3.1559319012, -7.5796796163, 0.3155072918  
C, 0, 3.3879956493, -6.2107675575, 0.357915208  
C, 0, 2.9274892863, -5.4288074503, 1.498304222  
C, 0, 0.6496356814, -4.1861094252, 2.6710078959  
C, 0, 1.352290857, -3.5391170487, 1.572112135  
C, 0, 2.4675193089, -4.1384930905, 1.002885259  
C, 0, 2.6432541857, -4.1237423956, -0.4459442324  
C, 0, 3.2118046981, -5.4044238047, -0.8433033432

C, 0, 2.8120923939, -6.0041704356, -2.0319327892  
C, 0, 2.5674913493, -7.4395911942, -2.0745011773  
C, 0, 1.4272301962, -7.6766818175, -2.9498336625  
C, 0, 0.5084235189, -8.6710089317, -2.6384618865  
C, 0, -1.9647615889, -9.107156282, 1.1114918648  
C, 0, -2.5223155144, -6.5591121164, -2.6822784907  
C, 0, -3.1948766422, -7.1827319415, -1.638733366  
C, 0, -3.6551468956, -6.4008878257, -0.4987968033  
C, 0, -3.4216389819, -5.0322330823, -0.4554661771  
C, 0, -2.7123073154, -4.3820085805, -1.5486180547  
C, 0, -0.9631836171, -4.8711502525, -3.2125789515  
C, 0, -0.3934933201, -6.151767492, -3.6105612286  
C, 0, -1.3570549027, -7.1946267663, -3.2823733207  
C, 0, -0.9172140234, -8.4243414796, -2.8088858248  
C, 0, -1.6214442949, -9.0779757796, -1.7139105873  
C, 0, -2.7330742052, -8.4716510236, -1.1426553378  
C, 0, -3.4796369702, -7.206759903, 0.7015679099  
C, 0, -3.0786407229, -6.6054496136, 1.8883413868  
C, 0, -2.837657998, -5.1693983382, 1.9349544914  
C, 0, -3.0051745699, -4.3997236098, 0.789468792  
C, 0, -2.0440614281, -3.3525247185, 0.4636491876  
C, 0, -1.8646335972, -3.3414166311, -0.9826243322  
C, 0, -0.6099107852, -3.1058654609, -1.5278398849  
C, 0, -0.1480328434, -3.8836819004, -2.6717247914  
C, 0, 0.9666146466, -6.387328256, -3.4490160331  
C, 0, 1.8210447592, -5.353785096, -2.8799807307  
C, 0, 1.2782148627, -4.1308312974, -2.5022072038  
C, 0, 1.6962936933, -3.5088164627, -1.2533847654  
C, 0, 0.5291539686, -2.8767999613, -0.6525490165  
C, 0, 0.3612962807, -2.8909892402, 0.723504857  
C, 0, -0.954327428, -3.1329315988, 1.2969698876  
C, 0, -0.776188904, -3.9391250526, 2.4988232917  
C, 0, -1.6958672246, -4.9338527314, 2.8097986783  
C, 0, -2.9089128624, -8.4866495635, 0.3038052134  
C, 0, -2.0885284082, -7.2568405555, 2.7359115495  
C, 0, -2.2791415041, -5.1237925171, -2.6389686232

### **C<sub>70</sub>@dibenzo[a,g]corannulene+4ethyl**

C, 0, -0.2765098858, 0.5924401821, 3.0939006286  
C, 0, 1.1437949407, 0.5464066522, 2.8384201908  
C, 0, 1.68052695, 0.8647553449, 1.5034197323  
C, 0, 0.7716400862, 1.4088414811, 0.6259502696  
C, 0, -0.6353585972, 1.4769838546, 0.8918626538  
C, 0, -2.6364670895, 0.7302517691, 1.9234561984  
C, 0, 2.9093142914, 0.4331074414, 0.8954513313  
C, 0, 3.080948239, 0.4162134533, -0.4876550855  
C, 0, 2.0413402, 0.8309251841, -1.3903287662  
C, 0, 0.9498716985, 1.401430257, -0.7757883487  
C, 0, -0.3446930881, 1.480985395, -1.3854636116  
C, 0, -1.3103383333, 1.5239802383, -0.3516888485  
C, 0, -2.6209286767, 1.1117825343, -0.5209634522  
C, 0, -3.3065009039, 0.7925147445, 0.7087358919  
C, 0, -2.9771021694, 0.8104408962, -1.8870005826  
C, 0, -2.0248619098, 0.7623670226, -2.8974697345



C, 0, -0.6254736487, 1.0192397835, -2.6465294576  
C, 0, 0.5497389293, 0.607521449, -3.4332941639  
C, 0, 1.8491719349, 0.4907893489, -2.8126208837  
C, 0, -1.2200667212, 0.9955388634, 2.0364179567  
H, 0, -4.3512308999, 0.4995344773, 0.6757078732  
H, 0, -3.9960863347, 0.5169247554, -2.1196600475  
H, 0, -2.3412117657, 0.4260780259, -3.8795423604  
H, 0, 3.9923228852, -0.0242174226, -0.8787638903  
H, 0, 3.6955598407, 0.0057036378, 1.5093272269  
H, 0, -3.1877202902, 0.3838212135, 2.7914722608  
C, 0, 1.9780241663, 0.0652316801, 3.857678819  
C, 0, 1.5038697794, -0.3968982137, 5.0820632927  
H, 0, 3.0499990447, 0.0374982659, 3.677470603  
C, 0, -0.7326193687, 0.1390876769, 4.3409370209  
C, 0, 0.1110797167, -0.3597358537, 5.3297929935  
H, 0, -1.7998629183, 0.1648772028, 4.5434228227  
C, 0, 2.8894765438, -0.0579402999, -3.5773593439  
C, 0, 2.7298770945, -0.4879672098, -4.8931135356  
H, 0, 3.8710092008, -0.1581813059, -3.1202233884  
C, 0, 0.4187186581, 0.2022932861, -4.7691464129  
C, 0, 1.4660170951, -0.3366490582, -5.5105531043  
H, 0, -0.5518466154, 0.3009203572, -5.2478667279  
C, 0, 2.5103034046, -0.9527858985, 6.0697514663  
H, 0, 3.3102139452, -0.2156518807, 6.2108526685  
H, 0, 2.0515873058, -1.1039443674, 7.0504615466  
C, 0, 3.1298348408, -2.2762925507, 5.5882766389  
H, 0, 3.5749007427, -2.1601975487, 4.5941919111  
H, 0, 3.9095236464, -2.617062123, 6.2752716988  
H, 0, 2.3698983936, -3.0591865143, 5.5154898117  
C, 0, -0.5031023828, -0.9079817843, 6.5989052028  
H, 0, 0.0764222628, -0.6057782284, 7.4773724205  
H, 0, -1.5006334353, -0.4733401755, 6.7239387836  
C, 0, -0.6229645133, -2.4406049772, 6.5532832422  
H, 0, -1.099548036, -2.8282977323, 7.4580809886  
H, 0, -1.2212228033, -2.7469825783, 5.687933036  
H, 0, 0.3621040217, -2.9081951747, 6.4568499086  
C, 0, 3.9170178665, -1.1250626084, -5.5877689951  
H, 0, 4.7822523245, -0.4564062904, -5.5007558729  
H, 0, 3.7227768302, -1.2427357061, -6.6569303382  
C, 0, 4.2800990488, -2.4926426922, -4.9840882754  
H, 0, 5.1497063381, -2.9241976936, -5.4876427081  
H, 0, 4.5116840738, -2.3996608057, -3.9183398141  
H, 0, 3.4449070088, -3.1946569348, -5.0767215641  
C, 0, 1.1895424487, -0.8056457757, -6.9218894551  
H, 0, 2.0131105055, -0.5375902554, -7.591655416  
H, 0, 0.304123796, -0.2828453056, -7.2991717532  
C, 0, 0.9411152489, -2.3217434602, -6.9757682022  
H, 0, 0.717715225, -2.6522076, -7.9941367203  
H, 0, 1.8143976479, -2.8767036151, -6.617979598  
H, 0, 0.0955013429, -2.5867104593, -6.3318805398  
C, 0, -1.6416448808, -4.8896916533, 3.4409984635  
C, 0, -1.9760151376, -3.6753100535, 2.7180577874  
C, 0, -0.3358803199, -5.1187404047, 3.8632881393  
C, 0, -0.9953459028, -2.7418184147, 2.44694049  
C, 0, -0.9565029834, -2.0917168749, 1.1430841579  
C, 0, -1.9634957418, -2.3175226247, 0.1728258971

C, 0, -1.5858920571, -2.1044588766, -1.1751567561  
C, 0, -0.4989727139, -7.4660212506, 3.1400792795  
C, 0, -1.8583275666, -7.2181958554, 2.6987538743  
C, 0, 0.2509019358, -6.4413306367, 3.7077644347  
C, 0, -2.4149104423, -5.9629034996, 2.844564628  
C, 0, -3.2356085257, -5.4054774246, 1.7784260517  
C, 0, -3.5591834422, -6.1608208504, 0.6229295971  
C, 0, -3.866207656, -5.4158869116, -0.5435705125  
C, 0, -3.0110178594, -3.3127627733, 0.4619557617  
C, 0, -2.966217554, -4.0028488776, 1.6997022806  
C, 0, -3.5958953099, -4.0138670791, -0.6228581846  
C, 0, 2.2177186551, -7.1394521157, 2.4009862833  
C, 0, 1.4264438646, -8.2029461933, 1.8102610506  
C, 0, 1.6462618065, -6.2734013638, 3.3277170334  
C, 0, 0.1032650259, -8.3618530562, 2.1703316627  
C, 0, -0.8906854152, -8.6800612142, 1.1548153238  
C, 0, -0.520073839, -8.926564881, -0.1910576436  
C, 0, -1.5212234659, -8.6900206575, -1.1663286778  
C, 0, -2.9644495464, -7.5003612125, 0.4669356119  
C, 0, -2.0939539351, -7.9778794419, 1.478736129  
C, 0, -2.7245266529, -7.9880017565, -0.8424088661  
C, 0, 2.7547241374, -4.3612489728, 2.2440284236  
C, 0, 3.3417356326, -5.2706999583, 1.2776402755  
C, 0, 1.922343974, -4.8475145994, 3.2472354889  
C, 0, 3.0804819345, -6.6244192525, 1.3550127319  
C, 0, 2.8355007601, -7.3848787244, 0.1372307346  
C, 0, 2.9531719744, -6.7884389257, -1.1436470871  
C, 0, 2.2052642883, -7.3950911742, -2.1841842238  
C, 0, 0.8925850854, -8.7567449495, -0.5755308448  
C, 0, 1.8214528879, -8.3539950922, 0.4167999691  
C, 0, 1.1909088689, -8.3640631841, -1.9044410213  
C, 0, 0.369187986, -2.9704648115, 2.8879544613  
C, 0, 1.2391448331, -2.4795747794, 1.8353741573  
C, 0, 0.6964748995, -4.1330455752, 3.5764014106  
C, 0, 2.404886459, -3.1492485772, 1.5252502975  
C, 0, 2.7968987685, -3.3104685683, 0.1300560974  
C, 0, 2.0619333356, -2.7048322339, -0.9202637069  
C, 0, 2.1662323351, -3.3199011837, -2.1923567556  
C, 0, 3.2336516521, -5.3438275581, -1.2262072474  
C, 0, 3.3733335777, -4.6107228048, -0.0203583212  
C, 0, 2.7429893906, -4.6207563806, -2.3427146258  
C, 0, 0.8190992743, -1.9879212662, -0.5852285769  
C, 0, 0.4123981015, -1.9304121458, 0.7693356223  
C, 0, -0.2174027432, -1.9401615192, -1.548088863  
C, 0, 1.0624289782, -4.3874876287, -3.9838101295  
C, 0, 1.1232512527, -3.1678292984, -3.1994648301  
C, 0, -0.0404561058, -2.4966749294, -2.8825687535  
C, 0, -0.1614865569, -4.8800983671, -4.4266651154  
C, 0, 0.5261694009, -7.1660069423, -3.8259737705  
C, 0, 1.7987140316, -6.6448200153, -3.3643253675  
C, 0, 2.0604170224, -5.2910260498, -3.4405907514  
C, 0, -0.4371333232, -6.3062295991, -4.3435537141  
C, 0, -2.1901389715, -7.4928045364, -3.0868985773  
C, 0, -1.1781962928, -8.3821228858, -2.5477516473  
C, 0, 0.1449200193, -8.2228900432, -2.9077022614  
C, 0, -1.8325167762, -6.4741546705, -3.9642008279

C, 0, -3.3322425949, -4.9172095536, -2.7882730016  
C, 0, -3.6961261126, -5.9836331147, -1.8742525959  
C, 0, -3.1397804634, -7.2386696491, -2.0201385312  
C, 0, -2.4197897573, -5.1515376952, -3.8119839001  
C, 0, -1.3221659816, -2.9963050698, -3.3452862072  
C, 0, -2.2757101726, -2.7653119867, -2.2738590303  
C, 0, -3.2563548698, -3.6979699777, -2.0046950556  
C, 0, -1.3867364574, -4.1654154211, -4.0974584368

### **C<sub>70</sub>@dibenzo[a,g]corannulene+8ethyl-1**

C, 0, -0.1352113334, -0.243522666, 3.1834355789  
C, 0, 1.1670008234, 0.2193929333, 2.7300252665  
C, 0, 1.3764831756, 0.704762626, 1.3595016231  
C, 0, 0.2335223764, 0.7634580004, 0.605059834  
C, 0, -1.0366783746, 0.2734774336, 1.0278001538  
C, 0, -2.6383807757, -0.8916361459, 2.3273318969  
C, 0, 2.5915997058, 0.8780960289, 0.6081341897  
C, 0, 2.5967067463, 0.9335374736, -0.7849660239  
C, 0, 1.3860552954, 0.820785319, -1.5514878333  
C, 0, 0.2411713542, 0.8086933863, -0.8003643693  
C, 0, -1.0182729765, 0.3239213968, -1.2667819014  
C, 0, -1.8009375332, 0.0149945929, -0.1370312155  
C, 0, -2.9447402274, -0.7505814421, -0.1663753601  
C, 0, -3.4565630574, -1.0410282401, 1.1876794372  
C, 0, -3.3139041403, -1.2000503418, -1.5118247513  
C, 0, -2.5013311917, -0.9210290925, -2.6412058928  
C, 0, -1.265310252, -0.141103328, -2.5329396602  
C, 0, -0.1315301805, 0.1202658055, -3.4760232909  
C, 0, 1.1678650641, 0.534504217, -2.976635013  
C, 0, -1.3002388057, -0.2849222224, 2.250834074  
H, 0, 3.5577007881, 0.9781206167, -1.2867594522  
H, 0, 3.5500193783, 0.8790777616, 1.1166409914  
C, 0, 2.2652958985, 0.0995016621, 3.5949548075  
C, 0, 2.191043306, -0.45666853, 4.8664749852  
H, 0, 3.2343537659, 0.4419557688, 3.2405505693  
C, 0, -0.1827679746, -0.7341871648, 4.5015861059  
C, 0, 0.9257115692, -0.8691931264, 5.3337892464  
H, 0, -1.1242095245, -1.0566790314, 4.9143423012  
C, 0, 2.2373977961, 0.6355558202, -3.8762935388  
C, 0, 2.1205960244, 0.3976336723, -5.240886309  
H, 0, 3.2096814164, 0.9255811754, -3.4856683308  
C, 0, -0.230566217, -0.0256789147, -4.8715154023  
C, 0, 0.841386461, 0.0968993819, -5.7537600498  
H, 0, -1.1904552016, -0.2522613153, -5.3112433001  
C, 0, 3.4682137473, -0.6292296933, 5.6615264862  
H, 0, 4.0044431543, 0.3271388378, 5.6935590781  
H, 0, 3.245467082, -0.8952193686, 6.6982225155  
C, 0, 4.3875885829, -1.6986657556, 5.0468954859  
H, 0, 4.6765297738, -1.4236044669, 4.0275911623  
H, 0, 5.2981464417, -1.8229327087, 5.6398514846  
H, 0, 3.8768276192, -2.6658331394, 4.9906733947  
C, 0, 0.7322913505, -1.5307762155, 6.6809098032  
H, 0, 1.3092435425, -1.0176506806, 7.4573928225

H, 0, -0.3207728363, -1.4416796829, 6.9697212154  
C, 0, 1.1181487799, -3.0192027588, 6.6402491261  
H, 0, 0.9448455971, -3.5007698023, 7.6068267399  
H, 0, 0.5261812289, -3.541499344, 5.8808118855  
H, 0, 2.1738240471, -3.1444453971, 6.3791903719  
C, 0, 3.3703889603, 0.4466435213, -6.0941545336  
H, 0, 3.9083515463, 1.3810853751, -5.8931872214  
H, 0, 3.1151047225, 0.45725069, -7.1572827327  
C, 0, 4.3042392885, -0.7416026994, -5.8012063489  
H, 0, 5.200500325, -0.700845097, -6.426459519  
H, 0, 4.6162612605, -0.7374433712, -4.752339697  
H, 0, 3.7947172869, -1.69223496, -5.9856507063  
C, 0, 0.5966441094, -0.1478470189, -7.2274880935  
H, 0, 1.1075839112, 0.6079038383, -7.8342698049  
H, 0, -0.4738968244, -0.0310614932, -7.4286045303  
C, 0, 1.0395767563, -1.552968868, -7.6677813283  
H, 0, 0.8035946261, -1.7280989657, -8.7212744429  
H, 0, 2.1173068341, -1.6857009374, -7.5339872551  
H, 0, 0.5326154569, -2.3149303316, -7.0675189504  
C, 0, -2.8797112204, -1.4896648753, -4.0017635778  
H, 0, -2.9042849959, -0.6696814656, -4.727097235  
H, 0, -3.8959780505, -1.8813910194, -3.9907875817  
C, 0, -4.5167666004, -2.1189062764, -1.6801491031  
H, 0, -5.087883983, -1.8537809948, -2.5736043635  
H, 0, -5.2085789177, -1.9830035968, -0.856476411  
C, 0, -4.9412022516, -1.3407270072, 1.3813340046  
H, 0, -5.4823018659, -0.9085295544, 0.5379123237  
H, 0, -5.2995416169, -0.7712579554, 2.2445248286  
C, 0, -5.3363684033, -2.8154157313, 1.565052034  
H, 0, -5.0725803484, -3.171139854, 2.5643044457  
H, 0, -6.4160644288, -2.9442539515, 1.4400488477  
H, 0, -4.8290111539, -3.4603945688, 0.8429992878  
C, 0, -4.1316092062, -3.6065532188, -1.7294886738  
H, 0, -5.0233747157, -4.2411011164, -1.7104148662  
H, 0, -3.561007146, -3.8455373148, -2.6291673832  
H, 0, -3.5075251206, -3.8638626794, -0.8666611146  
C, 0, -1.9499895497, -2.6113393049, -4.5052699493  
H, 0, -2.1418052018, -2.8205202293, -5.5631956655  
H, 0, -0.8950562274, -2.3515848832, -4.3966236434  
H, 0, -2.1166470663, -3.5342771583, -3.9455352866  
C, 0, -3.166242345, -1.3659714748, 3.6709509615  
H, 0, -2.8711580153, -0.6629770236, 4.4548129185  
H, 0, -4.2567803499, -1.3599468634, 3.682017162  
C, 0, -2.6985479154, -2.7936160644, 4.0140327787  
H, 0, -3.0758958824, -3.1030841851, 4.9943653984  
H, 0, -3.0602683486, -3.5005857977, 3.2618983256  
H, 0, -1.6082501246, -2.8714241324, 4.0243324074  
C, 0, 0.271577272, -2.7101807764, 0.8520779146  
C, 0, -0.7241172175, -3.4461737445, 0.0972650252  
C, 0, 1.3722854595, -2.1629468251, 0.2056888353  
C, 0, -0.580088009, -3.5996671453, -1.2690510299  
C, 0, -0.8772130244, -4.8862362683, -1.8835804814  
C, 0, -1.4161058029, -5.9626662837, -1.1348461763  
C, 0, -1.1765530899, -7.2614806538, -1.6497571415  
C, 0, 2.8441966234, -2.9101037848, 2.0308200671  
C, 0, 1.6923629828, -3.488226989, 2.7002282077

C,0,2.6910998489,-2.266106344,0.8095174929  
C,0,0.4424233586,-3.3951812455,2.1200723651  
C,0,-0.458150616,-4.5378838869,2.1471479646  
C,0,-0.1239949845,-5.7270366857,2.8413674642  
C,0,-0.7582702553,-6.9114822984,2.3877535491  
C,0,-1.5709478295,-5.7978956388,0.321723725  
C,0,-1.1765618254,-4.5687094374,0.9088513809  
C,0,-1.4699710095,-6.9465144796,1.1478186186  
C,0,4.7248202279,-3.3526932284,-0.0465360776  
C,0,4.8726931551,-4.0348616978,1.2257608101  
C,0,3.6568915288,-2.4866971026,-0.2553696699  
C,0,3.9555840299,-3.8207818407,2.2355941564  
C,0,3.4937568677,-4.9386590242,3.0461292166  
C,0,4.0325362728,-6.2403421348,2.8843513038  
C,0,3.19767047,-7.3145365124,3.2824608827  
C,0,1.2125147155,-5.831776449,3.4548240422  
C,0,2.1048274477,-4.7361445662,3.3282372177  
C,0,1.8092161803,-7.1131767538,3.5624063594  
C,0,3.3167841272,-3.4186321405,-2.5075627719  
C,0,4.42537634,-4.3271516029,-2.2776063055  
C,0,2.9345531145,-2.5175022136,-1.5187743344  
C,0,5.1118648988,-4.2945277921,-1.0797037958  
C,0,5.5169391449,-5.5390423491,-0.4412942881  
C,0,5.3081201221,-6.7935492152,-1.0673161044  
C,0,5.2215594452,-7.914394306,-0.2036183753  
C,0,5.0097571922,-6.4697399344,1.804829698  
C,0,5.3697076208,-5.3796592482,0.9729318799  
C,0,5.0740917851,-7.7548696801,1.210232376  
C,0,0.5612944021,-3.0194309191,-1.9514170583  
C,0,0.9710603244,-3.9657154974,-2.9741983885  
C,0,1.5214366682,-2.3170415104,-1.2314281136  
C,0,2.3108958164,-4.1587181128,-3.2477680757  
C,0,2.8129219249,-5.5049291858,-3.4890315759  
C,0,1.9415212741,-6.6217444501,-3.551352945  
C,0,2.5179283187,-7.8816911123,-3.2517522469  
C,0,4.5754934598,-6.8293875374,-2.3456615614  
C,0,4.1103150669,-5.6077632177,-2.8952641448  
C,0,3.8151059075,-7.9841253287,-2.6582032363  
C,0,0.5118185051,-6.4151190954,-3.2611636102  
C,0,0.0705789033,-5.1092034107,-2.9315872445  
C,0,-0.2281131902,-7.4844521917,-2.696801874  
C,0,2.5223121362,-9.7932782614,-1.8677504998  
C,0,1.7096290127,-8.9899566789,-2.7618851795  
C,0,0.3698976089,-8.7960808491,-2.4910514231  
C,0,1.9581927598,-10.3682062466,-0.7337162238  
C,0,3.9305624897,-9.7235693402,0.5899187762  
C,0,4.510221275,-9.1227000432,-0.596835967  
C,0,3.8239745086,-9.1565182228,-1.7942116648  
C,0,2.6815922479,-10.33244027,0.528708053  
C,0,2.0508801782,-9.2819662034,2.6637544778  
C,0,3.3547553966,-8.6476694673,2.7180311503  
C,0,4.2702608419,-8.8627208447,1.7074503764  
C,0,1.7161516724,-10.10549857,1.5941588241  
C,0,-0.5189860511,-9.0800509606,1.4879602669  
C,0,-0.1602682977,-8.2219025692,2.6017424144  
C,0,1.0920770935,-8.3200868427,3.1744110526

C, 0, 0.3960135487, -10.0015449253, 0.9901082379  
C, 0, -0.2275872337, -9.3957181765, -1.31239986  
C, 0, -1.1765868974, -8.433197109, -0.7846720935  
C, 0, -1.3188118296, -8.2791710367, 0.5798095352  
C, 0, 0.5458126026, -10.1638752935, -0.4485623028

### **C<sub>70</sub>@dibenzo[a,g]corannulene+8ethyl-2**

C, 0, -2.8766118139, 3.8812159602, -1.0039565398  
C, 0, -2.571525783, 3.4493303173, -2.3578561059  
C, 0, -3.0275892756, 2.1502956993, -2.8703867579  
C, 0, -3.8373209799, 1.4618989308, -2.0070696067  
C, 0, -4.1548178065, 1.8815621602, -0.6841971723  
C, 0, -4.0409874771, 3.1140224999, 1.3278095638  
C, 0, -2.563850313, 1.3726001031, -3.9876641185  
C, 0, -2.7767281384, -0.002511528, -4.0616993349  
C, 0, -3.4827674164, -0.7199713494, -3.0335449535  
C, 0, -4.0711481868, 0.0803525153, -2.0918422585  
C, 0, -4.5497603619, -0.3692064607, -0.8260885773  
C, 0, -4.6285274031, 0.7556553683, 0.029859609  
C, 0, -4.7565570117, 0.6925543339, 1.4018951741  
C, 0, -4.5182827914, 1.9973848774, 2.05138244  
C, 0, -5.0229388179, -0.6820837117, 1.8801823047  
C, 0, -4.8696880992, -1.8024120496, 1.0290559957  
C, 0, -4.5156672953, -1.6666897335, -0.3893071648  
C, 0, -4.0003216227, -2.6230653769, -1.4165257055  
C, 0, -3.481900252, -2.1464520794, -2.6883294903  
C, 0, -3.7133856759, 3.0365227542, -0.0988795296  
H, 0, -2.3139600641, -0.5408032077, -4.8822712819  
H, 0, -1.9464479718, 1.8299589389, -4.7535359463  
C, 0, -1.6981764814, 4.222578235, -3.1371760765  
C, 0, -1.0638953845, 5.3698775131, -2.6783388103  
H, 0, -1.4866420977, 3.8885638397, -4.1498445432  
C, 0, -2.2202195784, 5.052416169, -0.5772455087  
C, 0, -1.3353871332, 5.7916267031, -1.3588203268  
H, 0, -2.3706417397, 5.4107596021, 0.4279425793  
C, 0, -2.8554170845, -3.0572119632, -3.5507524984  
C, 0, -2.6706145863, -4.4010022782, -3.2522519804  
H, 0, -2.4629338515, -2.6816808395, -4.4923250399  
C, 0, -3.8682511623, -4.0059546221, -1.1888577799  
C, 0, -3.2094720573, -4.887624609, -2.0429589085  
H, 0, -4.2754448693, -4.4367391478, -0.2899520619  
C, 0, -0.0841153168, 6.0747478223, -3.5936547991  
H, 0, -0.575171443, 6.2811731713, -4.5525543219  
H, 0, 0.2049538827, 7.0436219566, -3.178054576  
C, 0, 1.178204504, 5.2334139049, -3.8486454147  
H, 0, 0.9205526214, 4.2738273098, -4.3082680758  
H, 0, 1.8714144746, 5.7560232463, -4.5137796133  
H, 0, 1.6977205306, 5.0170176922, -2.9095434687  
C, 0, -0.6605046306, 6.9965372512, -0.73912954

H, 0, -0.6429979556, 7.8346261681, -1.4440889248  
H, 0, -1.2543245946, 7.3302123949, 0.1189430425  
C, 0, 0.767693644, 6.6798782133, -0.2676584578  
H, 0, 1.2407144844, 7.5584875805, 0.1803020743  
H, 0, 0.7477022081, 5.8780272363, 0.4771995684  
H, 0, 1.391856142, 6.3407136809, -1.1009260949  
C, 0, -1.8647715506, -5.2521654315, -4.2108037161  
H, 0, -2.2866061417, -5.1580803211, -5.2190179202  
H, 0, -1.9328767481, -6.3097471942, -3.9426269139  
C, 0, -0.3866238281, -4.8259470111, -4.2432900704  
H, 0, 0.1896497709, -5.4488653894, -4.9331971017  
H, 0, -0.2900527695, -3.7831772407, -4.5620247442  
H, 0, 0.062703264, -4.905945242, -3.2480114819  
C, 0, -3.0306542397, -6.322048035, -1.5956606161  
H, 0, -3.2016141216, -7.0158412783, -2.4256245588  
H, 0, -3.7880387645, -6.5534418787, -0.838561174  
C, 0, -1.6331409641, -6.5562233682, -0.9972540628  
H, 0, -1.5185983314, -7.5860418325, -0.6472696001  
H, 0, -0.8505557165, -6.3561221924, -1.7362297472  
H, 0, -1.4676272816, -5.8813076327, -0.1506519589  
C, 0, -5.1441112734, -3.190215571, 1.5868953829  
H, 0, -5.6398080144, -3.7886477171, 0.8164982888  
H, 0, -5.8690245493, -3.128848234, 2.4007654344  
C, 0, -5.6184673373, -0.904383224, 3.2717183457  
H, 0, -6.5846450719, -1.4092204865, 3.1415031307  
H, 0, -5.8711932789, 0.0624019667, 3.6909179181  
C, 0, -4.7031618947, 2.1364065871, 3.5543097871  
H, 0, -5.7036872272, 1.8039575125, 3.8402658517  
H, 0, -4.6616808912, 3.1803544977, 3.8587315133  
C, 0, -3.6255348366, 1.3689046513, 4.3429684288  
H, 0, -2.7103945114, 1.9616181021, 4.4169565825  
H, 0, -3.9611913801, 1.1316451574, 5.3572670255  
H, 0, -3.3593140611, 0.4356270182, 3.8407127403  
C, 0, -4.7981363175, -1.6858818974, 4.3232361526  
H, 0, -5.0409178764, -1.3281871568, 5.3283931903  
H, 0, -5.0099067925, -2.7567722417, 4.2964279127  
H, 0, -3.7225456358, -1.5588884437, 4.1764027156  
C, 0, -3.8905002639, -3.9256258765, 2.1007463081  
H, 0, -4.1581783014, -4.9137371829, 2.4904717004  
H, 0, -3.1457570112, -4.0578089743, 1.313028212  
H, 0, -3.4060937752, -3.3597803204, 2.8989623216  
C, 0, -3.8967265939, 4.4600666237, 2.023938663  
H, 0, -4.0047933395, 5.2472597817, 1.2752320795  
H, 0, -4.7355170681, 4.6206393643, 2.705918991  
C, 0, -2.575397, 4.6273807865, 2.7940773031  
H, 0, -2.4618347613, 5.6507426776, 3.166041188  
H, 0, -2.5375265171, 3.9488223835, 3.6510062163  
H, 0, -1.7140675177, 4.3941154884, 2.1592088248  
C, 0, 2.6703713107, 2.1672650377, -2.6236315089  
C, 0, 1.2499268948, 1.8759743363, -2.54818789  
C, 0, 3.5558918765, 1.2209536368, -3.1290027211  
C, 0, 0.7749827099, 0.6531201274, -2.9795347134  
C, 0, -0.2510457379, -0.0374813819, -2.2121485978  
C, 0, -0.8535119499, 0.5628524673, -1.0793799252  
C, 0, -1.4068807051, -0.3282001927, -0.1285381117  
C, 0, 5.1470689909, 1.7232880048, -1.3197404453

C,0,4.2166676594,2.7061146349,-0.796516481  
C,0,4.8279536426,0.9927510113,-2.4594677612  
C,0,3.0096881684,2.9225192439,-1.4313970638  
C,0,1.7985057661,3.1150358033,-0.6447130617  
C,0,1.8415295816,3.1746103987,0.7717519897  
C,0,0.6459017492,2.8197277853,1.4466910519  
C,0,-0.3464307613,1.8663623483,-0.6181909441  
C,0,0.7189803314,2.4729804469,-1.3292652368  
C,0,-0.4321356693,2.1749510851,0.7614899105  
C,0,5.6974318701,-1.055526516,-1.4059382498  
C,0,6.0228157012,-0.2867432182,-0.219146262  
C,0,5.1104597979,-0.4345197159,-2.5037973889  
C,0,5.7547414799,1.0668398516,-0.1771341324  
C,0,5.2168203584,1.6618170065,1.0382375047  
C,0,5.0468242909,0.8998890996,2.2214771507  
C,0,4.0635528419,1.3683585445,3.1286135614  
C,0,3.1290143088,2.9418515531,1.4497834246  
C,0,4.2726910944,2.6668857728,0.6581967278  
C,0,3.1193336133,2.3733952106,2.748710371  
C,0,3.5613207139,-2.3293720529,-2.7632450284  
C,0,4.1754343304,-2.9679310036,-1.6143161934  
C,0,4.0139541638,-1.0891061624,-3.201033761  
C,0,5.2167258739,-2.3472181263,-0.9532764541  
C,0,5.2705989833,-2.3770284478,0.501751965  
C,0,4.3269484478,-3.1131505847,1.2617326839  
C,0,4.1166123586,-2.6701991102,2.5918108134  
C,0,5.3324235816,-0.5453557262,2.1766731988  
C,0,5.7656324644,-1.1129042191,0.9522008555  
C,0,4.6118970223,-1.406176703,3.0422919915  
C,0,1.6912222723,-0.3376196926,-3.5147842686  
C,0,1.2272574847,-1.6339159753,-3.0533098882  
C,0,3.0526932849,-0.0658905868,-3.5873125205  
C,0,2.1384016901,-2.6054846209,-2.6893293336  
C,0,1.8874178598,-3.4277311536,-1.5131677329  
C,0,0.6749635821,-3.3251968804,-0.7832078834  
C,0,0.7331822234,-3.7209877059,0.5777945017  
C,0,3.2158455345,-3.776196837,0.5557717561  
C,0,3.1374555247,-3.6502053269,-0.8541599461  
C,0,1.9835281827,-3.9432948094,1.2364380115  
C,0,-0.2982330586,-2.2907627339,-1.1744856578  
C,0,0.0191737135,-1.4396748482,-2.263435586  
C,0,-1.1330986574,-1.731792568,-0.1749338556  
C,0,0.4660499894,-3.1159647873,2.8436745255  
C,0,-0.2070892486,-3.2001580687,1.5605621769  
C,0,-1.1153017872,-2.2275973101,1.1925740977  
C,0,0.200120183,-2.0586561191,3.7078543461  
C,0,2.6028011913,-1.8422719089,4.2010997754  
C,0,2.8713433542,-2.9431537951,3.2958222982  
C,0,1.8302581837,-3.5635396722,2.6338934933  
C,0,1.2979684584,-1.4039136934,4.4034398092  
C,0,2.0534230816,0.9370726268,4.2872762079  
C,0,3.4104431364,0.4707720001,4.0711778984  
C,0,3.6779596559,-0.8827766179,4.029372207  
C,0,1.0162049425,0.0235452744,4.4472069911  
C,0,-0.4211848128,1.3799032171,2.981297071  
C,0,0.6659534824,2.3261577147,2.8169527631



C,0,1.8723696939,2.109715636,3.4532895279  
C,0,-0.2551184896,0.251826434,3.7784113639  
C,0,-1.4061099188,-1.1235411819,2.0909769057  
C,0,-1.571497395,0.0586484492,1.2650394043  
C,0,-1.0958037651,1.2804874233,1.6998477479  
C,0,-0.7616480607,-1.0350713669,3.3211896223
